# Supplementary material for: Colquhounia Root Tablet Promotes Autophagy and Inhibits Apoptosis in Diabetic Nephropathy by Suppressing CD36 Expression In Vivo and In Vitro
Source: Hindawi journal article supplement (doi:10.1155/2023/4617653), 2023-08-16
Supplement: f1 [file 4617653.f1.pdf]

**Table 1 The primer sequences for PCR**

| <b>Gene Name</b> | <b>Primers Sequence (5' to 3')</b> |
|------------------|------------------------------------|
| Rat Cd36 F       | GCAAAACGACTGCAGGTCAA               |
| Rat Cd36 R       | CCCGGTCACTTGGTTTCTGA               |
| Human CD36 F     | CAGGTCAACCTATTGGTCAAGCC            |
| Human CD36 R     | GCCTTCTCATCACCAATGGTCC             |

**Fig. 1 Heatmap analysis of differential genes between the DN and CRT groups**

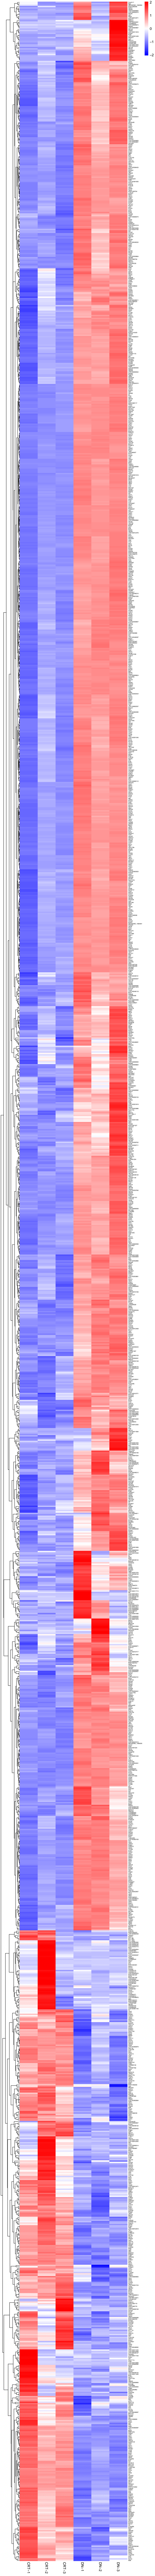

Table 2 Heatmap analysis of differential genes between the DN and CRT groups

| GeneID    | CRT-1     | CRT-2     | CRT-3     | DN-1      | DN-2      | DN-3      |
|-----------|-----------|-----------|-----------|-----------|-----------|-----------|
| Alcf      | 0.7561102 | 0.7799323 | 0.7579239 | 1.510054  | 1.5281989 | 1.5083485 |
| Pkhd1     | 0.3093695 | 0.3493171 | 0.3701307 | 0.9519353 | 1.0127604 | 1.0429634 |
| Itgal     | 0.6271543 | 0.6331084 | 0.5349356 | 1.3772974 | 1.3507974 | 1.4028619 |
| Osbp18    | 0.7688011 | 0.8585477 | 0.7791445 | 1.5439159 | 1.5220364 | 1.5515818 |
| Lrrc58    | 0.7702499 | 0.7007294 | 0.7659296 | 1.6095856 | 1.6823704 | 1.6166649 |
| Mib1      | 0.5093989 | 0.5105946 | 0.4860531 | 1.2203541 | 1.1806881 | 1.1580436 |
| Zbed6     | 0.2927156 | 0.443318  | 0.3589451 | 1.1346889 | 1.0585995 | 1.1087747 |
| Col4a3    | 0.9212613 | 0.8801931 | 0.89387   | 1.5360676 | 1.5305597 | 1.5456785 |
| Dmx11     | 0.5465414 | 0.6328796 | 0.6109435 | 1.1923468 | 1.1840716 | 1.1977022 |
| Cep350    | 0.3286436 | 0.3474233 | 0.3287584 | 0.8417787 | 0.8316422 | 0.8628433 |
| Hipk2     | 0.8496439 | 0.8658792 | 0.8497076 | 1.4434653 | 1.4525007 | 1.4287359 |
| Cpd       | 0.8194903 | 0.9008458 | 0.8542296 | 1.4419827 | 1.4425097 | 1.4870131 |
| Uhmk1     | 0.6270104 | 0.6887043 | 0.7150927 | 1.3202295 | 1.3096301 | 1.3000442 |
| Mbn11     | 0.7723243 | 0.8430837 | 0.8583634 | 1.4538551 | 1.4274577 | 1.4595883 |
| Lcor      | 0.2781639 | 0.3242123 | 0.3022028 | 0.7810243 | 0.7488595 | 0.766211  |
| Zfp704    | 0.3831332 | 0.4279692 | 0.4573315 | 0.9275515 | 0.8975292 | 0.9569822 |
| Eeal      | 0.6172119 | 0.701961  | 0.6406328 | 1.204728  | 1.2075077 | 1.2429296 |
| Zbtb20    | 0.1913549 | 0.1857744 | 0.1344689 | 0.803026  | 0.7576714 | 0.815544  |
| Mob1b     | 0.5469738 | 0.6242541 | 0.5048868 | 1.263301  | 1.238776  | 1.2264569 |
| Dennd4c   | 0.4911127 | 0.5755417 | 0.5182385 | 1.0593199 | 1.023943  | 1.0586462 |
| Secisbp21 | 0.7103569 | 0.7495944 | 0.7740021 | 1.297407  | 1.2574305 | 1.2908917 |
| Med13     | 0.5119937 | 0.5945157 | 0.5490375 | 1.1214127 | 1.0654129 | 1.0819141 |
| Nbeal1    | 0.196098  | 0.23741   | 0.2237624 | 0.6726997 | 0.6406797 | 0.7177897 |
| Lifr      | 0.8563268 | 0.8048057 | 0.8890632 | 1.4922978 | 1.5406188 | 1.4385608 |
| Zygl1b    | 0.6752454 | 0.7197748 | 0.7099902 | 1.2185764 | 1.1806849 | 1.2416394 |
| Slco4c1   | 0.5487309 | 0.5445363 | 0.5832289 | 1.2137147 | 1.2138132 | 1.270591  |
| Shroom4   | 0.5643034 | 0.5822022 | 0.5789751 | 1.104117  | 1.1149584 | 1.0545489 |
| Cd2ap     | 1.043032  | 1.192065  | 1.1048816 | 1.7262364 | 1.7063672 | 1.6939361 |
| Myo9a     | 0.4953148 | 0.6470362 | 0.5282174 | 1.0907778 | 1.1342945 | 1.1869611 |
| Kmt2c     | 0.4775802 | 0.4871418 | 0.5135291 | 0.9524745 | 0.9692179 | 0.9230396 |
| Ubr1      | 0.3978646 | 0.5094825 | 0.5047671 | 1.02018   | 1.0216574 | 1.0372097 |
| Xiap      | 0.7057337 | 0.8037366 | 0.7783552 | 1.3239689 | 1.2424992 | 1.3323039 |
| Birc6     | 0.8352467 | 0.898302  | 0.859442  | 1.361871  | 1.3418207 | 1.3611097 |
| Vps13a    | 0.6222489 | 0.7055128 | 0.6421839 | 1.1602516 | 1.1415112 | 1.1493903 |
| ND4L      | 3.163038  | 3.1646938 | 3.1901911 | 3.7660423 | 3.6799291 | 3.7429068 |
| Tnks      | 0.3769844 | 0.4587612 | 0.4696317 | 0.9763485 | 0.974422  | 1.019411  |
| Fcho2     | 0.8647989 | 0.9641336 | 0.9409973 | 1.4569802 | 1.4179006 | 1.4396799 |
| Nf1       | 0.3482444 | 0.4201638 | 0.4020917 | 0.8650172 | 0.8281411 | 0.8380064 |
| Taok1     | 0.6458624 | 0.7102997 | 0.6541143 | 1.1890557 | 1.1675456 | 1.2114222 |
| At13      | 0.7088831 | 0.8178451 | 0.7757969 | 1.2919576 | 1.2867234 | 1.3029378 |
| Slc5a3    | 0.4102504 | 0.51523   | 0.3780256 | 1.2757147 | 1.2382017 | 1.0898345 |
| Lmbrd2    | 0.2750264 | 0.3400412 | 0.2886003 | 1.0023911 | 0.9263963 | 0.960152  |
| Fam126b   | 0.6490506 | 0.7026722 | 0.6555841 | 1.3009055 | 1.1996027 | 1.1701626 |
| Pappa     | 0.1910647 | 0.3425669 | 0.2819942 | 0.959497  | 0.9642667 | 0.8249807 |
| Mga       | 0.3301136 | 0.4362737 | 0.4381069 | 0.8611378 | 0.8383788 | 0.8990996 |
| Ralgapa2  | 0.5357615 | 0.5887942 | 0.5679859 | 0.9967525 | 0.991155  | 1.0042482 |
| Arfgef3   | 0.3669516 | 0.2303476 | 0.2279533 | 0.9359323 | 0.8222121 | 0.9556924 |
| Zdhhc21   | 0.2915468 | 0.3244786 | 0.2769506 | 0.9422656 | 0.9058869 | 0.9901153 |
| Macf1     | 0.8139077 | 0.8662722 | 0.8331836 | 1.3061059 | 1.2565318 | 1.2941569 |
| Ncoa2     | 0.6180293 | 0.6562459 | 0.6481519 | 1.0685707 | 1.0890728 | 1.0744802 |

|         |           |           |           |           |           |           |
|---------|-----------|-----------|-----------|-----------|-----------|-----------|
| Ddx3    | 0.8623617 | 0.9236886 | 0.9458554 | 1.4169474 | 1.3464788 | 1.4129741 |
| Lrp6    | 0.7053395 | 0.7756228 | 0.7625439 | 1.1971351 | 1.196274  | 1.1846934 |
| Cpeb2   | 0.4201555 | 0.4632594 | 0.425148  | 0.8771543 | 0.8833263 | 0.8341631 |
| Atrx    | 0.5549001 | 0.6004748 | 0.5939493 | 0.9926466 | 0.9639962 | 1.0052729 |
| Nfib    | 0.4426713 | 0.5778881 | 0.4995895 | 1.0283057 | 1.0156167 | 1.0335192 |
| Smg1    | 0.6682038 | 0.7606074 | 0.7141466 | 1.1566343 | 1.1324803 | 1.1598724 |
| Ash11   | 0.684733  | 0.7521805 | 0.7239806 | 1.1733758 | 1.1379934 | 1.1495118 |
| Zkscan1 | 0.711677  | 0.8325905 | 0.7886171 | 1.2914424 | 1.2644016 | 1.2962374 |
| Vcpip1  | 0.5266061 | 0.5229955 | 0.539903  | 1.0467533 | 0.9850848 | 1.0823486 |
| Usp34   | 0.6089015 | 0.6740985 | 0.673269  | 1.1187948 | 1.0607957 | 1.086042  |
| Mtr     | 0.6489659 | 0.5560138 | 0.5686339 | 1.1054136 | 1.0696232 | 1.1415285 |
| Vps13c  | 0.5181428 | 0.6714849 | 0.5618279 | 1.0668868 | 1.0855322 | 1.063421  |
| Sim1    | 0.548587  | 0.5683034 | 0.5386812 | 0.9995132 | 1.0078504 | 0.9440919 |
| Dmx12   | 0.7594219 | 0.838216  | 0.8083977 | 1.2378243 | 1.2269251 | 1.2224788 |
| Pnizr   | 1.3253103 | 1.4206171 | 1.3875184 | 1.837865  | 1.8244784 | 1.8729609 |
| Phip    | 0.3765615 | 0.5093281 | 0.4184383 | 0.9080376 | 0.8399243 | 0.903155  |
| Itpr1   | 1.0883776 | 1.0839483 | 1.0580286 | 1.51232   | 1.4891151 | 1.5168325 |
| Ptprd   | 0.8639969 | 0.950058  | 0.8910609 | 1.4038612 | 1.3782689 | 1.316118  |
| Alg10   | 0.3803059 | 0.4145616 | 0.4369002 | 1.0746679 | 0.9825075 | 1.0835393 |
| Arhgap5 | 0.7905112 | 0.9073225 | 0.8524001 | 1.288135  | 1.2717779 | 1.3581845 |
| Rictor  | 0.3967854 | 0.5127898 | 0.4949558 | 0.881847  | 0.8818555 | 0.903938  |
| Tmf1    | 0.8312061 | 0.9443048 | 0.9053476 | 1.3525943 | 1.3206134 | 1.3430235 |
| Trove2  | 0.1974719 | 0.2425756 | 0.2242602 | 0.7887564 | 0.7590984 | 0.8249092 |
| Plcb1   | 0.6033367 | 0.5933337 | 0.5616928 | 1.0399509 | 0.9907944 | 1.0216865 |
| Rif1    | 0.2247587 | 0.3479068 | 0.3180244 | 0.7330754 | 0.7402943 | 0.8070974 |
| Kmt2a   | 0.4211256 | 0.4967841 | 0.4656896 | 0.8245032 | 0.7809419 | 0.8367541 |
| Lyst    | 0.2122928 | 0.2817861 | 0.2718684 | 0.6446314 | 0.5969405 | 0.6530111 |
| Son     | 1.2113442 | 1.315391  | 1.3121391 | 1.7166608 | 1.7040258 | 1.7525445 |
| Ar      | 0.157182  | 0.1860783 | 0.2273008 | 0.7249485 | 0.7519723 | 0.7616357 |
| Larp4   | 0.5925335 | 0.6302164 | 0.6395802 | 1.0909738 | 1.1135182 | 1.1507126 |
| Fnbp11  | 0.923038  | 1.0472697 | 1.0297274 | 1.4648623 | 1.5018492 | 1.4807302 |
| Esrrg   | 0.7752654 | 0.816948  | 0.8404133 | 1.1745578 | 1.2239547 | 1.2616927 |
| Chm     | 0.4656299 | 0.5516509 | 0.5308553 | 1.0467252 | 0.9699086 | 1.0519559 |
| Pik3c2a | 0.5421827 | 0.6505605 | 0.6439331 | 1.1383435 | 1.0065339 | 1.0547012 |
| Kat6a   | 0.5745912 | 0.6575762 | 0.6019098 | 0.9936642 | 0.9992961 | 0.986181  |
| Clcn5   | 0.6364282 | 0.5975538 | 0.5702068 | 1.1557016 | 1.1559181 | 1.1142109 |
| Cpeb4   | 1.1912763 | 1.2425364 | 1.1669938 | 1.7183107 | 1.7272165 | 1.6078778 |
| Slc16a7 | 1.2193508 | 1.1378003 | 1.2373883 | 1.6182014 | 1.664506  | 1.694977  |
| Cmtm4   | 0.9016302 | 0.976516  | 1.0050155 | 1.4399339 | 1.4641151 | 1.4863618 |
| Pdpr    | 1.0561035 | 1.0568229 | 1.0957924 | 1.4841091 | 1.4953311 | 1.4887812 |
| Ino80d  | 0.3351385 | 0.4250115 | 0.3527578 | 0.7390626 | 0.7475903 | 0.733183  |
| Ttc14   | 0.6723926 | 0.7404166 | 0.739473  | 1.225326  | 1.141793  | 1.2735968 |
| Ube3a   | 0.7098758 | 0.8201073 | 0.7429069 | 1.2142191 | 1.1570085 | 1.2082616 |
| Hnf4g   | 0.6379461 | 0.7616008 | 0.6255032 | 1.1085149 | 1.2059767 | 1.213271  |
| Ranbp2  | 1.3262286 | 1.4213532 | 1.4005092 | 1.8098108 | 1.7733671 | 1.8706278 |
| Zbtb41  | 0.5043226 | 0.5487021 | 0.5161928 | 0.9465228 | 0.8836495 | 0.9014308 |
| Thoc2   | 0.6580794 | 0.7934868 | 0.7162097 | 1.1497482 | 1.1130966 | 1.1779493 |
| Usp9x   | 1.0066049 | 1.0555585 | 1.0087429 | 1.4477352 | 1.3936648 | 1.4334477 |
| Pikfyve | 0.7488561 | 0.7807201 | 0.7672181 | 1.199758  | 1.1418786 | 1.1465207 |
| Kmt2d   | 0.5759349 | 0.6013845 | 0.615125  | 0.9415552 | 0.9451664 | 0.9451474 |
| Mdn1    | 0.2525402 | 0.2513964 | 0.2528644 | 0.5424512 | 0.5143354 | 0.5537905 |

|              |           |           |           |           |           |           |
|--------------|-----------|-----------|-----------|-----------|-----------|-----------|
| Fnip1        | 0.5856749 | 0.6546064 | 0.6030799 | 1.0505494 | 0.9791457 | 1.0055075 |
| Acadsb       | 1.0714763 | 1.0503621 | 1.0770224 | 1.4333076 | 1.5320742 | 1.5596004 |
| RGD130710C   | 0.6538013 | 0.7296359 | 0.7821103 | 1.1681361 | 1.1132438 | 1.1377733 |
| Apc          | 0.6374143 | 0.6854343 | 0.6580046 | 1.0400219 | 1.0286287 | 1.0041128 |
| Ptpn4        | 0.3945808 | 0.4957605 | 0.4835222 | 0.859689  | 0.8099597 | 0.8398185 |
| Atp11c       | 0.4073114 | 0.4660182 | 0.4261    | 0.8348635 | 0.7925545 | 0.8450025 |
| Klhl24       | 1.1178626 | 1.2435921 | 1.1489127 | 1.6303098 | 1.6152712 | 1.5844744 |
| Lig4         | 0.6219424 | 0.7727472 | 0.720993  | 1.1375337 | 1.1217254 | 1.1545776 |
| Kif1b        | 0.7479041 | 0.8274469 | 0.8505314 | 1.1822312 | 1.2233641 | 1.2149441 |
| Lats1        | 0.704941  | 0.793251  | 0.7638559 | 1.1330755 | 1.1262918 | 1.1731085 |
| Hook1        | 0.960035  | 1.032171  | 0.9556601 | 1.4202738 | 1.3745423 | 1.3882044 |
| Pank3        | 0.8439727 | 0.9752214 | 0.9091186 | 1.3351469 | 1.3745135 | 1.3130355 |
| Zfp192       | 0.167355  | 0.1996583 | 0.2043025 | 0.5412045 | 0.5196577 | 0.5467242 |
| Fgd4         | 0.2789341 | 0.3269621 | 0.3255749 | 0.8034001 | 0.7970071 | 0.7620074 |
| Aff4         | 0.7643899 | 0.8592952 | 0.854417  | 1.2545558 | 1.189948  | 1.2308327 |
| Kdm7a        | 0.3804741 | 0.4506176 | 0.3792978 | 0.7948492 | 0.7553899 | 0.7605415 |
| Bmpr2        | 0.8133587 | 0.9182061 | 0.881295  | 1.3262522 | 1.2499025 | 1.2756573 |
| Klhl11       | 0.3514774 | 0.4088582 | 0.2895592 | 0.9629012 | 0.9846372 | 0.9802066 |
| Tmem245      | 0.7148066 | 0.7890784 | 0.7480983 | 1.1259192 | 1.1245422 | 1.1066537 |
| Megf9        | 0.6402633 | 0.6133116 | 0.5837201 | 1.1231263 | 1.0705043 | 1.0610967 |
| LOC102551515 | 0.2613871 | 0.2855672 | 0.3045956 | 0.8268114 | 0.7739767 | 0.8248104 |
| Fam135a      | 0.5613071 | 0.6215223 | 0.6082508 | 0.9859662 | 0.9363971 | 1.0208868 |
| Zfc3h1       | 0.6627831 | 0.7548351 | 0.6992621 | 1.0997788 | 1.0603854 | 1.082822  |
| Lpp          | 0.7360984 | 0.8468877 | 0.8161835 | 1.1889273 | 1.2044757 | 1.1763576 |
| Scai         | 0.1145228 | 0.179866  | 0.1563262 | 0.5750023 | 0.5462085 | 0.620146  |
| Insr         | 0.6976437 | 0.7490388 | 0.7512291 | 1.0986234 | 1.1587524 | 1.1047986 |
| Fras1        | 0.3771672 | 0.4733392 | 0.4431826 | 0.7848438 | 0.8387983 | 0.7588324 |
| Clock        | 0.7172009 | 0.7993159 | 0.740947  | 1.1819333 | 1.1132272 | 1.1309222 |
| LOC102546515 | 0.8458157 | 0.9892086 | 0.939395  | 1.3872473 | 1.3595392 | 1.3193532 |
| Xpr1         | 0.8869787 | 0.8563497 | 0.8657951 | 1.3165584 | 1.2666273 | 1.305777  |
| Zfp292       | 0.3469918 | 0.4903826 | 0.4588611 | 0.8338364 | 0.8145668 | 0.8573905 |
| Pcml         | 0.8222499 | 0.8796772 | 0.8667975 | 1.2253099 | 1.2335333 | 1.2238474 |
| Ankrd10      | 0.9491519 | 0.9479066 | 0.929593  | 1.306766  | 1.304877  | 1.3812059 |
| Epm2aip1     | 0.8242252 | 0.8538891 | 0.8844319 | 1.2308231 | 1.1965663 | 1.3041695 |
| Bdp1         | 0.371889  | 0.4747761 | 0.4279778 | 0.7916699 | 0.7859345 | 0.8182042 |
| Nufip2       | 0.6277111 | 0.7815132 | 0.6905098 | 1.1583688 | 1.0832504 | 1.1303633 |
| Tulp4        | 0.4251697 | 0.4254893 | 0.4345495 | 0.808407  | 0.7481696 | 0.825051  |
| Clmn         | 1.0515559 | 1.0949144 | 1.0946011 | 1.4521008 | 1.4630231 | 1.4691151 |
| Fndc3b       | 0.8415857 | 0.901748  | 0.8497757 | 1.2533708 | 1.2201272 | 1.234002  |
| Tead1        | 0.8814997 | 0.9463633 | 0.9367361 | 1.2796414 | 1.2684626 | 1.306817  |
| Tnpol        | 0.869364  | 0.9528735 | 0.9351526 | 1.3185805 | 1.2810136 | 1.2901299 |
| Nfat5        | 0.9032958 | 1.0540116 | 1.0251597 | 1.4229341 | 1.4018715 | 1.4226423 |
| Jmjd1c       | 0.7721993 | 0.8379963 | 0.8196447 | 1.1752326 | 1.1985868 | 1.1656718 |
| Braf         | 0.3982961 | 0.4634259 | 0.4397816 | 0.7726941 | 0.7679306 | 0.7777817 |
| Slc8a1       | 0.7712574 | 0.8036295 | 0.7421558 | 1.1545249 | 1.1881356 | 1.1123365 |
| Dync1h1      | 0.950063  | 1.013821  | 1.024163  | 1.3517509 | 1.3560479 | 1.3808683 |
| Gc           | 1.1972615 | 1.1298615 | 1.1496787 | 0.5525095 | 0.6156914 | 0.578547  |
| Edem3        | 0.7692747 | 0.8482032 | 0.7931847 | 1.2394068 | 1.1614356 | 1.1653335 |
| Akap9        | 0.6219275 | 0.7206603 | 0.669069  | 1.0197719 | 1.028614  | 1.0319149 |
| Fam208a      | 0.6394592 | 0.7799046 | 0.728143  | 1.0997863 | 1.100158  | 1.1047451 |
| Asx12        | 0.5388199 | 0.5623502 | 0.4977232 | 0.917442  | 0.8578443 | 0.8853014 |

|            |           |           |           |           |           |           |
|------------|-----------|-----------|-----------|-----------|-----------|-----------|
| Baz2b      | 0.5678646 | 0.6866492 | 0.6175077 | 0.9815542 | 0.9914108 | 0.9890849 |
| Atf2       | 0.8353304 | 0.8618411 | 0.8823931 | 1.301069  | 1.3082323 | 1.3018997 |
| Gstp1      | 2.6551209 | 2.574793  | 2.5038534 | 2.0874864 | 1.8679992 | 2.124194  |
| Ankrd12    | 0.426746  | 0.4988792 | 0.4650633 | 0.8205273 | 0.8161442 | 0.7738269 |
| Chd9       | 0.3359277 | 0.3946692 | 0.3658666 | 0.7440531 | 0.6317205 | 0.7204207 |
| Rev3l      | 0.3866734 | 0.4390749 | 0.4483874 | 0.7654585 | 0.714885  | 0.7686491 |
| Fat1       | 0.9325009 | 0.9585072 | 0.968994  | 1.2755954 | 1.2878303 | 1.3277726 |
| Bmpr1a     | 0.9731478 | 1.0541933 | 1.0167791 | 1.367796  | 1.3640247 | 1.3975937 |
| Xrn1       | 0.5287662 | 0.5990331 | 0.5690156 | 0.9260231 | 0.8730441 | 0.922527  |
| Utrn       | 0.630683  | 0.7617506 | 0.7352701 | 1.0709621 | 1.0650494 | 1.1319834 |
| Ralgap1    | 0.7401827 | 0.8413354 | 0.7599083 | 1.1672014 | 1.1367637 | 1.1361298 |
| Nipbl      | 0.7617258 | 0.8251245 | 0.8018189 | 1.1578888 | 1.1230771 | 1.1503362 |
| Clk4       | 1.098508  | 1.1939994 | 1.1873253 | 1.5582717 | 1.5116056 | 1.5568176 |
| Itgb8      | 1.11517   | 1.2214105 | 1.1253157 | 1.6180799 | 1.5127241 | 1.5628321 |
| Tjp1       | 0.8438052 | 0.9454748 | 0.9006329 | 1.2938595 | 1.231469  | 1.2900995 |
| Efr3a      | 0.8070884 | 0.9427523 | 0.9410562 | 1.3013336 | 1.2766984 | 1.3038433 |
| Ccdc50     | 0.8728877 | 1.0136676 | 0.948151  | 1.3987874 | 1.3045046 | 1.3605843 |
| Phf2011    | 0.9032633 | 1.0126932 | 1.0060795 | 1.3493561 | 1.3290859 | 1.3941532 |
| Tcp1l1l1   | 0.3327582 | 0.3828897 | 0.2920692 | 0.879538  | 0.7872171 | 0.8066407 |
| Atm        | 0.3982752 | 0.4625915 | 0.407418  | 0.7632653 | 0.6934573 | 0.7840265 |
| RGD1561161 | 0.6188974 | 0.6087749 | 0.5767555 | 0.955189  | 0.9330065 | 1.0091014 |
| Trpm7      | 1.0066831 | 1.0984018 | 1.0845183 | 1.4716228 | 1.3987365 | 1.4444685 |
| Ccdc141    | 0.9366322 | 0.9023332 | 0.9118411 | 1.3524634 | 1.2392068 | 1.3143208 |
| Usp25      | 0.6234405 | 0.6719426 | 0.6114016 | 0.9724896 | 0.9801857 | 1.0193909 |
| Atxn1      | 0.2611113 | 0.3147365 | 0.2119072 | 0.738994  | 0.7589783 | 0.7557028 |
| Gnl3l      | 0.9826491 | 1.0091995 | 1.0884379 | 1.4261717 | 1.424286  | 1.4766155 |
| Iqgap2     | 1.1501606 | 1.2836152 | 1.2054387 | 1.6554349 | 1.5926779 | 1.5901356 |
| Rc3h1      | 0.5700606 | 0.6711929 | 0.6410454 | 1.0219467 | 0.9594412 | 0.9532033 |
| Ptar1      | 0.2324949 | 0.2784616 | 0.2384242 | 0.8544082 | 0.919349  | 0.8945107 |
| Camsap2    | 0.5994638 | 0.6485135 | 0.6411848 | 0.9723778 | 0.9374229 | 0.9596019 |
| RGD1305704 | 0.440905  | 0.4709855 | 0.4382627 | 0.8857421 | 0.837348  | 0.8766566 |
| RGD1305938 | 0.6556539 | 0.7794692 | 0.73811   | 1.1129601 | 1.0661712 | 1.1210198 |
| Cpsf6      | 0.6237672 | 0.7293154 | 0.6524828 | 1.0138852 | 0.9890647 | 1.0283965 |
| Map3k2     | 0.2208793 | 0.1230308 | 0.1176597 | 0.8042321 | 0.7643823 | 0.7544241 |
| Srek1      | 0.9053465 | 0.9832215 | 0.9751435 | 1.3353356 | 1.2886235 | 1.3196151 |
| Lrp2       | 2.0830474 | 2.0730397 | 2.0459155 | 2.4522949 | 2.4580414 | 2.4383214 |
| Dcaf17     | 0.7561855 | 0.8311373 | 0.7740316 | 1.1821318 | 1.139672  | 1.1698163 |
| Erbin      | 1.204733  | 1.3504579 | 1.2575987 | 1.6838247 | 1.6144101 | 1.7054471 |
| Slc30a1    | 1.1612641 | 1.1584762 | 1.1577196 | 1.4675925 | 1.5401576 | 1.5778934 |
| Tbcl1d8b   | 0.5994875 | 0.6950829 | 0.6651834 | 1.0139826 | 0.9895537 | 1.0253746 |
| Avl9       | 0.7895386 | 0.8235769 | 0.8243785 | 1.1606929 | 1.1166943 | 1.1525733 |
| Prkaa2     | 1.2045002 | 1.2273004 | 1.1697731 | 1.6161762 | 1.5701177 | 1.5404423 |
| Man1a2     | 0.8160254 | 0.8426564 | 0.8338351 | 1.191362  | 1.1747821 | 1.191154  |
| Kitlg      | 0.8167305 | 0.9030336 | 0.8312134 | 1.2453206 | 1.1545116 | 1.2440552 |
| Usf3       | 0.5463274 | 0.5823876 | 0.5766199 | 0.915241  | 0.8453002 | 0.8692577 |
| N4bp2      | 0.4066528 | 0.4905433 | 0.4551621 | 0.7465296 | 0.7625105 | 0.8176507 |
| Tet2       | 0.4519276 | 0.5031393 | 0.5159263 | 0.7795903 | 0.7996094 | 0.8297178 |
| Sogal      | 0.2061372 | 0.2294298 | 0.2214502 | 0.6302357 | 0.657597  | 0.7272664 |
| Pdzd2      | 0.6144201 | 0.6609771 | 0.6130563 | 0.931738  | 0.9358296 | 0.9770078 |
| Hipk3      | 0.9928519 | 1.0791487 | 1.0463994 | 1.4099733 | 1.4058988 | 1.3704749 |
| Erbp4      | 0.1995957 | 0.2366748 | 0.2809716 | 0.6363825 | 0.7775451 | 0.8278564 |

|            |           |           |           |           |           |           |
|------------|-----------|-----------|-----------|-----------|-----------|-----------|
| Zc3h12c    | 0.4079382 | 0.3919761 | 0.3904442 | 0.9366454 | 0.8195299 | 0.7722337 |
| Clgalt1    | 1.1974993 | 1.3075512 | 1.2172914 | 1.6485019 | 1.6087689 | 1.6012946 |
| Zfp266     | 0.6269973 | 0.7247924 | 0.7440877 | 1.0104394 | 1.0504984 | 1.1047615 |
| Rock2      | 0.8831679 | 1.0140403 | 0.9440916 | 1.3358584 | 1.2969969 | 1.308919  |
| Uba6       | 0.5499864 | 0.677722  | 0.6488873 | 0.9706681 | 0.9680815 | 1.0179192 |
| Myef2      | 0.8247786 | 0.9044507 | 0.8660591 | 1.234076  | 1.2348382 | 1.2391718 |
| Fam179b    | 0.5680851 | 0.6533422 | 0.6143519 | 0.9917549 | 0.9174664 | 0.9749865 |
| Rps6ka3    | 0.8403988 | 0.875845  | 0.8564579 | 1.1769004 | 1.1635653 | 1.1860234 |
| Crebrf     | 0.9612565 | 1.0250602 | 0.9976706 | 1.3714386 | 1.3422343 | 1.3132834 |
| Hectd1     | 1.028915  | 1.1195374 | 1.0804833 | 1.4287802 | 1.4082328 | 1.4209734 |
| Amn        | 2.3811855 | 2.2179225 | 2.2736188 | 1.8726932 | 1.9016699 | 1.867327  |
| Magt1      | 1.0530216 | 1.1309622 | 1.1382108 | 1.4901507 | 1.5450671 | 1.5489935 |
| Itsn2      | 0.9180784 | 0.923054  | 0.9567207 | 1.2687145 | 1.2454209 | 1.2902702 |
| Abcb7      | 0.8714614 | 0.8726329 | 0.8603705 | 1.2576579 | 1.2566811 | 1.2584623 |
| Dync2h1    | 0.3727634 | 0.4244468 | 0.4219181 | 0.6666459 | 0.6871863 | 0.7153183 |
| Cacnb4     | 0.4677961 | 0.4599584 | 0.4186153 | 0.8403648 | 0.7247552 | 0.8064384 |
| Ab12       | 0.3254762 | 0.3411851 | 0.3477632 | 0.7073482 | 0.6529109 | 0.6866372 |
| Ric1       | 0.6600155 | 0.7172729 | 0.6705763 | 1.0261616 | 1.0191774 | 0.9881988 |
| Zfp654     | 0.5784979 | 0.6677482 | 0.6355092 | 1.0139769 | 0.9657853 | 0.9750228 |
| Akap11     | 0.9594817 | 1.0061872 | 0.9973242 | 1.3141828 | 1.2959264 | 1.3256732 |
| RGD1309995 | 1.0176438 | 1.1220613 | 1.0589186 | 1.4943378 | 1.3688008 | 1.4738987 |
| Kdm5a      | 0.7958756 | 0.8579827 | 0.8238847 | 1.148554  | 1.1239501 | 1.1592577 |
| Mtpn       | 1.4072628 | 1.4966498 | 1.4924761 | 1.8639877 | 1.8133263 | 1.8202238 |
| Aplp1      | 1.5399447 | 1.5140992 | 1.5593481 | 1.1818643 | 1.2237491 | 1.2191494 |
| Ahctf1     | 0.7694374 | 0.8431923 | 0.8408423 | 1.1269607 | 1.1337429 | 1.1781706 |
| Lin7c      | 1.0015732 | 1.0582982 | 1.1129886 | 1.5748907 | 1.652058  | 1.6285978 |
| Wdfy3      | 1.0772404 | 1.076283  | 1.0829619 | 1.4237781 | 1.4058346 | 1.4020819 |
| Phc3       | 0.5386194 | 0.6586615 | 0.6067721 | 0.9071759 | 0.9034586 | 0.9707653 |
| Rbm25      | 0.8809676 | 0.9988407 | 0.9431323 | 1.2809524 | 1.2617074 | 1.3318047 |
| Polr2e     | 2.2065426 | 2.1926638 | 2.2188982 | 1.8331565 | 1.9026825 | 1.8450364 |
| Gcc2       | 0.8036069 | 0.9003549 | 0.8643822 | 1.188444  | 1.1629068 | 1.2157813 |
| Sema3d     | 0.1933235 | 0.2818897 | 0.2800459 | 0.6566107 | 0.7673996 | 0.7079176 |
| Ubr3       | 0.916567  | 0.9677367 | 0.9112141 | 1.2676711 | 1.2459724 | 1.2564096 |
| Arpc4      | 1.7506047 | 1.8034403 | 1.7983819 | 1.4364984 | 1.4720994 | 1.4854317 |
| Tp53inp1   | 1.0344297 | 1.1755882 | 1.1977998 | 1.5053915 | 1.6134814 | 1.5697238 |
| Wnk1       | 1.4133604 | 1.5300528 | 1.4091136 | 1.8402894 | 1.7985801 | 1.8527671 |
| Bclaf1     | 1.1216389 | 1.2239299 | 1.2154008 | 1.5253302 | 1.5267919 | 1.5517034 |
| Atp7a      | 0.3720209 | 0.4381942 | 0.3498687 | 0.7328196 | 0.7186255 | 0.7660943 |
| Prkdc      | 0.3612414 | 0.4051663 | 0.3926918 | 0.7053918 | 0.6170794 | 0.7073052 |
| Dgkh       | 0.2344495 | 0.2558126 | 0.1888322 | 0.5500991 | 0.458472  | 0.5287036 |
| Ftl1       | 3.7318381 | 3.6631122 | 3.6188945 | 3.2903446 | 3.3170528 | 3.2634649 |
| Islr       | 1.490935  | 1.4021342 | 1.5085486 | 1.0807758 | 1.0855986 | 1.1479576 |
| Ubn2       | 0.5166624 | 0.5307714 | 0.4734355 | 0.8092095 | 0.7755669 | 0.8255216 |
| Tgfbr3     | 0.7511315 | 0.8317853 | 0.7984088 | 1.1040382 | 1.1652081 | 1.1736628 |
| Ccdc88a    | 0.4448082 | 0.455357  | 0.4634654 | 0.7726634 | 0.7008966 | 0.8646343 |
| Arid2      | 0.5838068 | 0.6415182 | 0.5942987 | 0.9317751 | 0.9129192 | 0.9011987 |
| Sp3        | 0.5390775 | 0.7232697 | 0.5878151 | 1.029054  | 1.0300961 | 1.0784293 |
| Btbd7      | 0.8145347 | 0.886338  | 0.8462137 | 1.1992205 | 1.1610304 | 1.1678791 |
| Rapgef6    | 0.2943367 | 0.3751286 | 0.3870921 | 0.7192755 | 0.7308063 | 0.7683442 |
| Ogt        | 1.2380021 | 1.383863  | 1.3433853 | 1.7086288 | 1.6701615 | 1.6934004 |
| RGD1307235 | 0.7437359 | 0.8002979 | 0.7700168 | 1.0893029 | 1.0685768 | 1.1127335 |

|            |           |           |           |           |           |           |
|------------|-----------|-----------|-----------|-----------|-----------|-----------|
| Spag9      | 1.1441129 | 1.1846209 | 1.1683329 | 1.5138646 | 1.4738787 | 1.4923433 |
| Rpl14      | 2.5803931 | 2.6385598 | 2.595557  | 2.2868094 | 2.2892987 | 2.2534157 |
| Kif21a     | 0.9197338 | 0.9527547 | 0.9310982 | 1.2735908 | 1.2713338 | 1.2412687 |
| Tmem72     | 1.0337187 | 1.0572393 | 1.1514413 | 1.3888491 | 1.5023312 | 1.5457787 |
| Plxna2     | 0.491724  | 0.5606048 | 0.515407  | 0.8035338 | 0.8073636 | 0.8279403 |
| Prpf4b     | 0.9361667 | 1.0493814 | 1.0054562 | 1.3674954 | 1.3186466 | 1.3430867 |
| Fbxl17     | 0.9657043 | 1.0035709 | 1.0158324 | 1.3522919 | 1.3449527 | 1.3601425 |
| Ep300      | 0.7643179 | 0.8273279 | 0.8135585 | 1.096701  | 1.1185476 | 1.1254224 |
| Sptal      | 0.7084157 | 0.5507671 | 0.6357662 | 1.0194374 | 1.0834026 | 1.0062453 |
| Nr2c2      | 0.5857446 | 0.6899429 | 0.6527891 | 1.0716523 | 1.062432  | 1.1094373 |
| Luc7l3     | 1.3040623 | 1.3873639 | 1.3345592 | 1.7075007 | 1.6594262 | 1.7022629 |
| Ptch1      | 0.5690115 | 0.5996059 | 0.6344862 | 0.9188966 | 1.0517664 | 0.9851088 |
| Vps13d     | 0.748699  | 0.7757561 | 0.7600489 | 1.0520362 | 1.0584332 | 1.0587623 |
| RGD156514E | 0.1993383 | 0.135198  | 0.1797525 | 0.6853516 | 0.6779555 | 0.6141986 |
| Trps1      | 0.6139271 | 0.7934202 | 0.6776766 | 1.0433198 | 1.0505382 | 1.0906354 |
| Zscan26    | 0.7810267 | 0.9000427 | 0.8712025 | 1.179246  | 1.1659388 | 1.2067967 |
| Ago3       | 0.1951005 | 0.2118772 | 0.1753913 | 0.5302609 | 0.5240762 | 0.5185204 |
| Lrba       | 0.9168221 | 1.0041061 | 1.0033    | 1.285668  | 1.3181798 | 1.3046801 |
| Dach1      | 0.6616617 | 0.7259486 | 0.6977586 | 1.0871156 | 0.9651598 | 1.0497217 |
| Rblcc1     | 0.7432739 | 0.8164556 | 0.818329  | 1.1062632 | 1.0785348 | 1.1249952 |
| Kif5b      | 1.1632986 | 1.3232434 | 1.2463409 | 1.6246815 | 1.590924  | 1.6178515 |
| Ipo7       | 1.0604763 | 1.2142228 | 1.1137832 | 1.512991  | 1.4970377 | 1.4804395 |
| Cyp2d1     | 1.9508665 | 1.8946337 | 1.9653414 | 1.290222  | 1.4279473 | 1.603349  |
| Cygb       | 1.622853  | 1.6589038 | 1.6338915 | 1.3493633 | 1.2654841 | 1.3321534 |
| Ptprb      | 0.735725  | 0.814141  | 0.8146312 | 1.1353408 | 1.0784618 | 1.102754  |
| Sdsl       | 1.2249401 | 1.2956521 | 1.1703253 | 0.7030796 | 0.742971  | 0.7470419 |
| Agt        | 1.6422732 | 1.5048818 | 1.6375134 | 1.1713843 | 1.2176938 | 1.2754598 |
| Synj1      | 0.6505816 | 0.6795948 | 0.6925279 | 1.0188363 | 0.9601072 | 1.000041  |
| Prrg4      | 0.7211982 | 0.5805418 | 0.688427  | 1.3128066 | 1.1788101 | 1.1332756 |
| Agps       | 0.4908816 | 0.5678891 | 0.532288  | 1.014577  | 0.987931  | 1.1012445 |
| I112rb2    | 0.4469693 | 0.5506618 | 0.5116082 | 0.8380412 | 0.8949452 | 0.9172109 |
| Ppplr9a    | 0.2914575 | 0.2950057 | 0.3154828 | 0.5914012 | 0.5998695 | 0.6185442 |
| Cd99       | 2.131078  | 2.0677179 | 2.1297271 | 1.7040721 | 1.8090211 | 1.7537512 |
| Ahnak      | 0.9202018 | 1.081955  | 1.0015363 | 1.3368301 | 1.3313679 | 1.4096584 |
| Zfp462     | 0.3215713 | 0.3250641 | 0.374764  | 0.6245694 | 0.6229803 | 0.6186821 |
| Emilin1    | 1.3013042 | 1.284626  | 1.2283068 | 0.9674656 | 0.93153   | 0.9903517 |
| Peg3       | 0.5188891 | 0.5779562 | 0.5459877 | 0.8105804 | 0.8388904 | 0.8776    |
| Tmed5      | 0.7003826 | 0.9099595 | 0.8289561 | 1.3349614 | 1.2498609 | 1.2868927 |
| Rsbnl      | 0.4423481 | 0.5463236 | 0.4977645 | 0.8498135 | 0.8245762 | 0.8620345 |
| Zeb2       | 0.506117  | 0.629496  | 0.5539496 | 0.9383637 | 0.8439873 | 0.9611369 |
| Ccnt2      | 0.6253679 | 0.7209237 | 0.7169522 | 1.0134246 | 0.9805925 | 1.0131311 |
| LOC103690C | 0.4412194 | 0.6555447 | 0.575673  | 1.108072  | 1.0472246 | 1.1676814 |
| Map11c3a   | 2.0205924 | 1.9326012 | 1.9465857 | 1.624171  | 1.6178894 | 1.6529387 |
| Eef1g      | 2.4936138 | 2.567897  | 2.5178477 | 2.1515351 | 2.2411041 | 2.1762941 |
| Myo5a      | 0.7677989 | 0.7512055 | 0.7003683 | 1.1305718 | 1.0092748 | 1.1300334 |
| Mfap3l     | 1.4463231 | 1.5078115 | 1.5363879 | 1.8281908 | 1.8128875 | 1.836899  |
| Slk        | 0.9333246 | 1.0453309 | 1.0125697 | 1.3075282 | 1.3238718 | 1.351279  |
| Hcfc1      | 0.3549701 | 0.3696403 | 0.4002858 | 0.6813153 | 0.6551909 | 0.6732065 |
| Rbm25l1    | 0.6062707 | 0.6736118 | 0.6501832 | 1.047529  | 0.984528  | 1.0413926 |
| Akap13     | 0.7325352 | 0.7991571 | 0.7708633 | 1.077884  | 1.0584143 | 1.0638209 |
| Ids        | 0.7706223 | 0.9213433 | 0.8884724 | 1.255617  | 1.1921693 | 1.2260497 |



|            |           |           |           |           |           |           |
|------------|-----------|-----------|-----------|-----------|-----------|-----------|
| Phldb2     | 0.9393392 | 1.0346983 | 1.1070236 | 1.3713002 | 1.3861368 | 1.4202767 |
| Kras       | 1.0180474 | 1.1227186 | 1.0492471 | 1.4192292 | 1.3746203 | 1.396707  |
| Pcf11      | 0.4744733 | 0.5469349 | 0.5654596 | 0.8335074 | 0.7966839 | 0.8320837 |
| Slc5a8     | 1.1737624 | 1.305968  | 1.173313  | 1.7234079 | 1.8588375 | 1.5750649 |
| Fryl       | 0.4426004 | 0.5084445 | 0.4709855 | 0.7535699 | 0.7273315 | 0.7387288 |
| Cdc14b     | 0.5606176 | 0.632405  | 0.6179691 | 0.9789139 | 0.9797526 | 1.0380619 |
| Kansl11    | 0.5957324 | 0.6595138 | 0.6616605 | 0.971592  | 0.9095799 | 1.0539283 |
| Orc4       | 0.7507401 | 0.8160071 | 0.8442397 | 1.1499941 | 1.1125468 | 1.1727169 |
| Zfyve16    | 0.5814147 | 0.6779184 | 0.637231  | 0.9410119 | 0.9307586 | 0.9636561 |
| Pbrml      | 0.7121088 | 0.8139415 | 0.7605896 | 1.0827088 | 1.0496439 | 1.0737656 |
| Lgr4       | 1.2278119 | 1.2741241 | 1.3144823 | 1.5886004 | 1.6194751 | 1.5993994 |
| Jmy        | 0.5681888 | 0.5592919 | 0.5556751 | 0.8445843 | 0.8116224 | 0.8227281 |
| Pign       | 1.2604068 | 1.1861023 | 1.2515527 | 1.5930618 | 1.5355956 | 1.5938659 |
| Suco       | 0.8366844 | 0.9367866 | 0.9025068 | 1.1959147 | 1.1972962 | 1.2182285 |
| Stag2      | 1.0366435 | 1.1600857 | 1.0986946 | 1.4269365 | 1.3981114 | 1.4786596 |
| Acs14      | 0.8784307 | 0.9976715 | 0.9714352 | 1.348529  | 1.3573184 | 1.2439318 |
| Herc1      | 0.7465743 | 0.7515651 | 0.7854769 | 1.0279943 | 1.0386086 | 1.0705949 |
| Herc2      | 0.626533  | 0.6713485 | 0.6461599 | 0.9711578 | 0.9090754 | 0.9271087 |
| Atp13a3    | 0.4001782 | 0.2977076 | 0.316973  | 1.0675452 | 1.0828187 | 1.0217851 |
| Syne2      | 1.0430085 | 1.0892291 | 1.0304338 | 1.398978  | 1.3194585 | 1.4084854 |
| Sox6       | 0.3159157 | 0.3809435 | 0.3719312 | 0.6334481 | 0.6241578 | 0.625418  |
| Col4a5     | 0.9208105 | 0.9891285 | 0.9820188 | 1.3165897 | 1.2525967 | 1.279632  |
| Clic5      | 1.0782544 | 1.1383739 | 1.078204  | 1.4404153 | 1.4169652 | 1.3906186 |
| Dock4      | 0.2627079 | 0.3024536 | 0.2883392 | 0.6081694 | 0.6233155 | 0.7252467 |
| NEWGENE_1E | 0.5077923 | 0.5184307 | 0.4822036 | 0.8628407 | 0.8995168 | 0.8893243 |
| Mysm1      | 0.5195805 | 0.6608847 | 0.5618678 | 0.9061317 | 0.8878727 | 0.9474225 |
| Usp45      | 0.3112912 | 0.4136116 | 0.3043936 | 0.7733711 | 0.6855685 | 0.77892   |
| Uprrt      | 0.2191104 | 0.3053767 | 0.2879466 | 0.783834  | 0.7760581 | 0.7571047 |
| Dapk3      | 1.7484106 | 1.6509499 | 1.6606407 | 1.3475619 | 1.3640494 | 1.3690583 |
| Nup153     | 0.848961  | 0.9132008 | 0.869399  | 1.2063529 | 1.1720167 | 1.1602639 |
| Pfkfb2     | 0.8714768 | 0.8595502 | 0.8822728 | 1.1865411 | 1.1867698 | 1.1495456 |
| Ankrd26    | 0.296395  | 0.3139138 | 0.2888496 | 0.6933068 | 0.6395187 | 0.6661066 |
| Zdhhc17    | 0.6357309 | 0.7318591 | 0.7224289 | 1.0555989 | 1.0231341 | 1.052991  |
| Gan        | 0.2619162 | 0.2784515 | 0.2548658 | 0.6276953 | 0.6419394 | 0.5968315 |
| Ppp2r3a    | 0.855176  | 0.9318019 | 0.9533473 | 1.2120903 | 1.2049616 | 1.2502469 |
| Igip       | 0.5376744 | 0.5869363 | 0.5504475 | 0.8666808 | 0.8091104 | 0.825957  |
| Pde3b      | 0.6960018 | 0.7158911 | 0.7511339 | 1.1219369 | 1.1263952 | 0.9951616 |
| Sesn3      | 1.1794867 | 1.1819516 | 1.1728336 | 1.574562  | 1.4314146 | 1.5444106 |
| LOC100360C | 1.5890218 | 1.503562  | 1.4545518 | 1.1124638 | 1.0768757 | 1.0920151 |
| Tnrc6b     | 0.592114  | 0.6658811 | 0.6392132 | 0.9237776 | 0.930544  | 0.8913496 |
| Pdzd8      | 0.6316964 | 0.7051461 | 0.630267  | 0.9365047 | 0.9456638 | 0.9672299 |
| Bod111     | 0.4842408 | 0.5172783 | 0.4940795 | 0.7635065 | 0.7702509 | 0.7624455 |
| Prpf40a    | 0.961831  | 1.0745726 | 1.0283953 | 1.3465629 | 1.3093969 | 1.3706684 |
| Diaph2     | 0.1675263 | 0.1765313 | 0.2066653 | 0.5225272 | 0.5385161 | 0.5669404 |
| Cdk6       | 0.3103696 | 0.3927898 | 0.3169311 | 0.7067214 | 0.7485725 | 0.7068743 |
| ND5        | 3.2751185 | 3.245556  | 3.3124455 | 3.6798894 | 3.6054978 | 3.6072627 |
| Wsb1       | 1.2961185 | 1.3425085 | 1.2981395 | 1.7701651 | 1.5818666 | 1.7014906 |
| Ndufb10    | 2.3651737 | 2.3128699 | 2.2745228 | 1.9633087 | 2.0265823 | 1.9580552 |
| Qser1      | 0.5515178 | 0.6440444 | 0.5938611 | 0.9587899 | 0.9038535 | 0.8728005 |
| Rsf1       | 0.4931273 | 0.5553178 | 0.4665989 | 0.805181  | 0.7566347 | 0.7952858 |
| Sgms2      | 0.9769694 | 0.9564403 | 0.962813  | 1.3463095 | 1.2532446 | 1.3347951 |

|            |           |           |           |           |           |           |
|------------|-----------|-----------|-----------|-----------|-----------|-----------|
| Wwp1       | 1.4707835 | 1.5566813 | 1.4643601 | 1.8185023 | 1.792304  | 1.8485171 |
| Palm       | 2.0477277 | 1.9188335 | 1.990195  | 1.6449036 | 1.6693963 | 1.6500693 |
| Pdpk1      | 1.0092833 | 1.0701756 | 1.0825881 | 1.3516902 | 1.3593961 | 1.3748484 |
| Zfp445     | 0.7870703 | 0.8829764 | 0.8364484 | 1.1077195 | 1.1142409 | 1.1893155 |
| Eif3f      | 2.0466557 | 2.0650052 | 2.0913882 | 1.7717361 | 1.7847207 | 1.7772807 |
| Trip11     | 0.8226355 | 0.8608619 | 0.8131758 | 1.1351452 | 1.0990363 | 1.1345172 |
| Rfx7       | 0.4148482 | 0.4950633 | 0.4269941 | 0.7764368 | 0.7191984 | 0.7516261 |
| Ptbp3      | 1.0338354 | 1.1930725 | 1.1046929 | 1.4660613 | 1.4133459 | 1.4749954 |
| Zfp281     | 0.3607547 | 0.4572541 | 0.4106342 | 0.8430151 | 0.8545672 | 0.8636645 |
| Hmbox1     | 0.944648  | 0.9450898 | 0.9446684 | 1.2309001 | 1.2490284 | 1.2345765 |
| Stam2      | 0.8384051 | 0.9409799 | 0.9433077 | 1.2882292 | 1.2870487 | 1.2960699 |
| Mybl1      | 0.555739  | 0.6883709 | 0.598295  | 1.0255586 | 0.8805826 | 1.0849239 |
| Lcor1      | 0.2554603 | 0.3688483 | 0.3033018 | 0.6929746 | 0.6511479 | 0.678228  |
| Ascc3      | 0.5690037 | 0.6654706 | 0.5886814 | 0.9322807 | 0.8660998 | 0.9261682 |
| Atp2b4     | 0.744563  | 0.761446  | 0.7527566 | 1.0668664 | 0.9776569 | 1.0984152 |
| Reps2      | 0.7977746 | 0.8578635 | 0.7594642 | 1.2133708 | 1.0871532 | 1.1229905 |
| Slc13a1    | 1.9706266 | 2.0576758 | 2.1217096 | 2.4042573 | 2.4331094 | 2.6735977 |
| Mycbp2     | 0.7656815 | 0.8362258 | 0.8296386 | 1.1102725 | 1.0849719 | 1.1044362 |
| Ildr2      | 0.4592582 | 0.4251161 | 0.4414798 | 0.7875922 | 0.7501767 | 0.8876409 |
| Brwd1      | 0.5678216 | 0.66006   | 0.6558198 | 0.9043327 | 0.8917507 | 0.9313519 |
| Itch       | 1.2008361 | 1.3000827 | 1.2650464 | 1.5947044 | 1.519271  | 1.6133339 |
| Piga       | 0.3040839 | 0.4455839 | 0.4013539 | 0.870655  | 0.8719403 | 0.7891504 |
| Arhgef12   | 1.1721099 | 1.1899873 | 1.2129821 | 1.5149541 | 1.4858874 | 1.4834473 |
| Mecp2      | 0.6040599 | 0.6988569 | 0.6627574 | 0.9170899 | 0.9290226 | 0.9510064 |
| Tmem33     | 1.165016  | 1.2733552 | 1.1743033 | 1.5696947 | 1.5028449 | 1.5389648 |
| Rpl18      | 2.5537552 | 2.4856388 | 2.5003619 | 2.1684841 | 2.2343248 | 2.1943101 |
| Nr3c1      | 0.9619533 | 1.072523  | 0.9992298 | 1.3435331 | 1.3071795 | 1.3294205 |
| Mdm4       | 0.9775823 | 1.080278  | 1.0358605 | 1.3627702 | 1.3117656 | 1.3583697 |
| Ythdf3     | 0.9665369 | 1.0931694 | 1.0309967 | 1.3539404 | 1.3225692 | 1.3759325 |
| Pdpf       | 2.0748286 | 2.090676  | 2.1031203 | 1.7332463 | 1.8184901 | 1.8062471 |
| S100a16    | 1.7911711 | 1.8826946 | 1.7833315 | 1.4751705 | 1.5359796 | 1.519795  |
| Creb3l2    | 0.7621978 | 0.8415413 | 0.7965714 | 1.0898707 | 1.1104768 | 1.181976  |
| Tgfbr1     | 0.6847673 | 0.8667245 | 0.8002527 | 1.1581111 | 1.0753434 | 1.1763874 |
| Crim1      | 1.0838598 | 1.2359246 | 1.1839335 | 1.4791655 | 1.5028926 | 1.5136957 |
| Npat       | 0.3660086 | 0.4909026 | 0.4518977 | 0.7588113 | 0.7286222 | 0.804847  |
| Ggt1       | 3.001954  | 3.0305649 | 3.0100616 | 2.7075649 | 2.6985339 | 2.7607792 |
| LOC1025485 | 0.3835737 | 0.4798716 | 0.5073638 | 0.8236962 | 0.8107486 | 0.8408564 |
| Cdk15      | 0.1890043 | 0.1512453 | 0.2291719 | 0.5891516 | 0.6264869 | 0.7481874 |
| Far1       | 0.8020563 | 0.917139  | 0.8462585 | 1.1978581 | 1.1691067 | 1.2612651 |
| Mgat5      | 0.585774  | 0.6304259 | 0.602038  | 1.045034  | 0.9587414 | 1.0017316 |
| Dst        | 1.1435353 | 1.1908172 | 1.1944867 | 1.4488087 | 1.5003803 | 1.489999  |
| Gsk3b      | 1.1697737 | 1.231523  | 1.1961293 | 1.5121559 | 1.4736028 | 1.5183542 |
| Slc9a3r1   | 2.80926   | 2.7811    | 2.7746001 | 2.4625587 | 2.5127624 | 2.4679209 |
| Usp33      | 1.0051199 | 1.1215568 | 1.0610428 | 1.4049887 | 1.339672  | 1.3860781 |
| Chd6       | 0.5765641 | 0.6032147 | 0.6229466 | 0.8559982 | 0.8395815 | 0.8772693 |
| Itgav      | 0.9813678 | 1.1079643 | 1.1131715 | 1.4177304 | 1.4252596 | 1.3702577 |
| Slc10a5    | 0.4646374 | 0.5246934 | 0.5887269 | 1.0625375 | 1.0668792 | 1.1129179 |
| Slf2       | 0.4279014 | 0.5369015 | 0.4830694 | 0.8182241 | 0.7873426 | 0.7959799 |
| Bbx        | 0.1432193 | 0.2101111 | 0.2114855 | 0.6464695 | 0.5828656 | 0.6600356 |
| Cdc42bpa   | 0.7201403 | 0.7889602 | 0.7409776 | 1.0155916 | 1.0219788 | 1.0631207 |
| Aplg1      | 1.1385395 | 1.2266447 | 1.2102124 | 1.4777699 | 1.5107769 | 1.5134022 |

|            |           |           |           |           |           |           |
|------------|-----------|-----------|-----------|-----------|-----------|-----------|
| Rbm26      | 0.8230537 | 0.9263285 | 0.8859073 | 1.1704613 | 1.156888  | 1.2063011 |
| Acvr1c     | 0.2443424 | 0.2475135 | 0.2510195 | 0.7564932 | 0.7721819 | 0.7530549 |
| Ptov1      | 1.98475   | 1.9324248 | 1.9475839 | 1.6608607 | 1.6727109 | 1.6326187 |
| Fam91a1    | 1.3778628 | 1.55644   | 1.5176417 | 1.8666004 | 1.8253217 | 1.8293058 |
| Rock1      | 0.8241563 | 0.9952298 | 0.9178087 | 1.2624558 | 1.2216876 | 1.257792  |
| Dlg1       | 0.9759743 | 1.0165466 | 0.9738534 | 1.327251  | 1.266128  | 1.2977909 |
| Fndc3a     | 0.8391464 | 0.9234895 | 0.8541277 | 1.1733918 | 1.141067  | 1.1765693 |
| Usp31      | 0.1091802 | 0.1758059 | 0.1480151 | 0.5364918 | 0.5178639 | 0.4902898 |
| Exosc5     | 1.915013  | 1.8480267 | 1.9242789 | 1.5606665 | 1.6138864 | 1.5995989 |
| Coll2a1    | 0.7175834 | 0.7291738 | 0.732633  | 1.0495405 | 0.9433447 | 1.1052218 |
| Slc25a36   | 1.3562931 | 1.3761151 | 1.4100761 | 1.7207988 | 1.6427813 | 1.7117435 |
| Prpf39     | 0.7523945 | 0.9061888 | 0.9103117 | 1.2106595 | 1.1886691 | 1.2624768 |
| Zfp148     | 0.7288105 | 0.7934879 | 0.7576864 | 1.0469497 | 1.0273264 | 1.0296165 |
| Slc35a3    | 1.1352256 | 1.1388548 | 1.080937  | 1.4129446 | 1.4551046 | 1.4690814 |
| Otud4      | 0.8883277 | 0.9855936 | 0.9211027 | 1.2361401 | 1.2103842 | 1.2341784 |
| Gnb2       | 2.1254819 | 2.077974  | 2.1012124 | 1.7882018 | 1.8251238 | 1.8225718 |
| Zbtb44     | 0.5870172 | 0.5963275 | 0.5693388 | 0.8867866 | 0.8386207 | 0.8705111 |
| Loxl1      | 1.4852769 | 1.4830097 | 1.4692113 | 1.2266651 | 1.0534888 | 1.1292997 |
| Snx13      | 0.9947201 | 1.0866553 | 1.0572341 | 1.3828289 | 1.3469959 | 1.338257  |
| C5         | 1.5436806 | 1.4970876 | 1.5807541 | 1.9025706 | 1.8036653 | 1.9272458 |
| Slc4a4     | 1.940176  | 1.9018281 | 1.9262571 | 2.3501762 | 2.2531106 | 2.2253412 |
| Mbd3       | 2.129838  | 2.029555  | 2.1015573 | 1.7246557 | 1.8085294 | 1.7401205 |
| Klf12      | 0.4094036 | 0.481131  | 0.5172337 | 0.7837411 | 0.7939636 | 0.7263516 |
| Fam199x    | 0.0516141 | 0.0573542 | 0.1042114 | 0.6864263 | 0.6197952 | 0.6109499 |
| Flnb       | 0.7793459 | 0.879678  | 0.861679  | 1.1638675 | 1.1778772 | 1.1103467 |
| Fam208b    | 0.5450004 | 0.6057567 | 0.5749645 | 0.8319976 | 0.8210075 | 0.8947953 |
| Ankib1     | 0.8517124 | 0.934883  | 0.8936315 | 1.1901021 | 1.1756104 | 1.1769559 |
| Bptf       | 0.586358  | 0.6811808 | 0.6358092 | 0.8964123 | 0.9073445 | 0.9008129 |
| Gxylt1     | 0.5638521 | 0.6573607 | 0.6094102 | 0.912416  | 0.8853594 | 0.9050626 |
| Tbllxr1    | 0.9405982 | 0.9924019 | 0.8923747 | 1.3010041 | 1.2489131 | 1.2334979 |
| Skil       | 0.8189006 | 0.8036493 | 0.7101693 | 1.1961568 | 1.0226327 | 1.2097368 |
| Asb13      | 1.2528374 | 1.2114568 | 1.2974061 | 1.5880032 | 1.5969141 | 1.5506826 |
| LOC1003610 | 0.2126201 | 0.215474  | 0.1789472 | 0.6171271 | 0.5679668 | 0.6028542 |
| Pcmt2      | 0.9129455 | 1.0082062 | 1.0087348 | 1.3022926 | 1.2736149 | 1.2656455 |
| Amer1      | 0.1453462 | 0.2015856 | 0.1369989 | 0.5487294 | 0.5759166 | 0.5844108 |
| Zfp26      | 0.2087566 | 0.3132666 | 0.2955581 | 0.6005643 | 0.5981388 | 0.6427533 |
| RGD1309079 | 0.8528163 | 0.8953601 | 0.8711023 | 1.1698555 | 1.1320478 | 1.1861449 |
| Uevld      | 0.1631044 | 0.1544964 | 0.1142226 | 0.6254218 | 0.6298531 | 0.7019671 |
| Ireb2      | 0.9707581 | 1.1115137 | 1.0681934 | 1.3799138 | 1.3382113 | 1.3873071 |
| Mbtd1      | 0.7495691 | 0.812941  | 0.8034445 | 1.1741565 | 1.0722338 | 1.0837812 |
| Rcn3       | 1.2954044 | 1.3123433 | 1.2727478 | 0.8997454 | 0.9207769 | 0.9412979 |
| Strn       | 0.7054607 | 0.820854  | 0.7546484 | 1.1168496 | 1.0460086 | 1.0507853 |
| Cers6      | 0.4960467 | 0.4917883 | 0.4891338 | 0.9312246 | 1.0024255 | 0.9123597 |
| Arhgap29   | 1.0140756 | 1.1324537 | 1.1275344 | 1.390568  | 1.3814618 | 1.4447353 |
| Syne1      | 0.8292849 | 0.9031378 | 0.8521871 | 1.1896557 | 1.1013501 | 1.1781652 |
| Usp32      | 0.7867121 | 0.8917195 | 0.8567382 | 1.1489146 | 1.1064146 | 1.1409354 |
| Spcs3      | 0.9718977 | 1.2237596 | 1.1061244 | 1.5995281 | 1.5615938 | 1.604106  |
| Deptor     | 1.0296324 | 1.1609731 | 1.0831179 | 1.3718224 | 1.4005798 | 1.4208273 |
| Spopl      | 0.812757  | 0.8821839 | 0.8250639 | 1.1567794 | 1.1020298 | 1.179133  |
| Serping1   | 1.7661532 | 1.8666576 | 1.898781  | 1.5203116 | 1.4090832 | 1.5829121 |
| Slc5a12    | 1.6782366 | 1.6367244 | 1.7082368 | 2.1618126 | 2.1268313 | 1.9423556 |

|            |           |           |           |           |           |           |
|------------|-----------|-----------|-----------|-----------|-----------|-----------|
| LOC103691C | 0.6446155 | 0.7184629 | 0.66303   | 1.0062398 | 1.025523  | 1.0964538 |
| Igsf9b     | 0.2616246 | 0.2267806 | 0.2335297 | 0.5687797 | 0.634339  | 0.6654594 |
| Zfp397     | 0.3998822 | 0.5525682 | 0.4805924 | 0.8647833 | 0.8793508 | 0.9602042 |
| Chd1       | 0.5334303 | 0.693636  | 0.6156233 | 0.9690733 | 0.9115448 | 0.9319098 |
| Nat9       | 1.4373231 | 1.4674527 | 1.3876279 | 1.153425  | 1.1425324 | 1.1051386 |
| Efcab14    | 1.0354036 | 1.1227427 | 1.0932288 | 1.397312  | 1.3600308 | 1.3754463 |
| Rasa2      | 0.4877713 | 0.4082187 | 0.4304255 | 0.9967148 | 0.9354235 | 0.8341808 |
| Cdk12      | 0.6334694 | 0.6968054 | 0.6272565 | 0.9241791 | 0.9319978 | 0.9679513 |
| Rnf152     | 1.3364553 | 1.4153357 | 1.370584  | 1.7185942 | 1.6858547 | 1.6448736 |
| Dopey1     | 0.5769091 | 0.6096479 | 0.603366  | 0.8825414 | 0.8507588 | 0.8592038 |
| Pde4d      | 0.7729053 | 0.8075609 | 0.7638132 | 1.2334749 | 1.1359199 | 1.0337997 |
| Med14      | 0.5522415 | 0.6568802 | 0.6516749 | 0.9393184 | 0.9017794 | 0.9099923 |
| Lysmd3     | 0.2509302 | 0.3521698 | 0.3601095 | 0.8981479 | 0.88524   | 0.9728107 |
| Kat2b      | 0.7688516 | 0.8893319 | 0.884732  | 1.1467815 | 1.1410884 | 1.1884757 |
| Brwd3      | 0.1296054 | 0.187395  | 0.1438222 | 0.4391169 | 0.3740518 | 0.4258427 |
| Chuk       | 1.2610543 | 1.3247533 | 1.3376501 | 1.639328  | 1.6255384 | 1.5876835 |
| Dhx36      | 0.7469983 | 0.8735483 | 0.8532582 | 1.1608724 | 1.0857579 | 1.1731449 |
| Ppp1r12a   | 0.7827619 | 0.8884035 | 0.8721385 | 1.1627816 | 1.0923487 | 1.1758885 |
| Zfp518a    | 0.2663306 | 0.4285004 | 0.3494022 | 0.6760868 | 0.6796697 | 0.7973694 |
| Epn1       | 2.2316469 | 2.1672445 | 2.1947965 | 1.873958  | 1.9390762 | 1.8852404 |
| Hspbp1     | 1.669006  | 1.6210823 | 1.6435842 | 1.2938923 | 1.3940813 | 1.3207654 |
| Trim44     | 1.0137758 | 1.1061242 | 1.0607241 | 1.4614003 | 1.4637913 | 1.437289  |
| Smarcad1   | 0.5612719 | 0.6883398 | 0.628994  | 0.9577453 | 0.8863447 | 0.9860132 |
| Rnpepl1    | 1.7314772 | 1.6521838 | 1.661533  | 1.3651474 | 1.4164804 | 1.3723123 |
| LOC689130  | 1.9354956 | 2.0487421 | 2.0361194 | 1.6432045 | 1.7544459 | 1.6591321 |
| Zfx        | 0.597322  | 0.6652878 | 0.6148698 | 0.9262946 | 0.8836893 | 0.909745  |
| Smc2       | 0.3538062 | 0.4539516 | 0.3587385 | 0.7782325 | 0.6885315 | 0.7725945 |
| NEWGENE_1E | 0.53027   | 0.6297222 | 0.6302026 | 0.8796157 | 0.8737184 | 0.9162958 |
| Btaf1      | 0.5593242 | 0.6911697 | 0.622699  | 0.9182859 | 0.8840571 | 0.9313551 |
| Nrip1      | 0.7035364 | 0.7150511 | 0.6605612 | 1.0027389 | 0.9021363 | 1.0309069 |
| Aldoa      | 2.9851823 | 2.9531967 | 2.9684294 | 2.6196606 | 2.7191465 | 2.6129588 |
| Rbm27      | 0.4998947 | 0.6019232 | 0.5815142 | 0.9175018 | 0.8893588 | 0.8897788 |
| Exoc5      | 0.9747077 | 1.0568415 | 0.9371098 | 1.3483656 | 1.299587  | 1.302661  |
| Rabgap11   | 0.6060311 | 0.7713581 | 0.6417825 | 1.0008021 | 0.97291   | 0.9893154 |
| Mast4      | 0.0123734 | 0.0210824 | 0.0120904 | 0.1359497 | 0.1637417 | 0.1412835 |
| Shprh      | 0.4405326 | 0.4807765 | 0.4703284 | 0.7578036 | 0.720956  | 0.7493631 |
| Tmtc3      | 0.3798542 | 0.4684722 | 0.420111  | 0.7924965 | 0.7110221 | 0.738973  |
| Cpeb3      | 0.570244  | 0.5949618 | 0.5991975 | 0.8884871 | 0.9095345 | 0.8171796 |
| Arpc1b     | 1.981023  | 2.0515166 | 1.9522942 | 1.7246226 | 1.7163819 | 1.6871057 |
| Gfpt1      | 1.0089613 | 1.1410913 | 1.0688805 | 1.3428704 | 1.4073982 | 1.3924917 |
| Prkaa1     | 0.6483412 | 0.7386523 | 0.7527845 | 1.0267712 | 0.9892061 | 1.0213145 |
| Ppp1r1a    | 2.2275907 | 2.126882  | 2.2073181 | 1.7517916 | 1.8459106 | 1.9431202 |
| Pls1       | 1.3410748 | 1.4352451 | 1.3595077 | 1.6653562 | 1.6381573 | 1.7880045 |
| Zym2       | 0.6968837 | 0.7826274 | 0.7568607 | 1.0387195 | 0.9728013 | 1.0440718 |
| Cdc27      | 0.7190341 | 0.827369  | 0.829093  | 1.1054774 | 1.0727051 | 1.0881051 |
| Cdh6       | 0.5831954 | 0.5157366 | 0.5610089 | 0.9809833 | 0.9930059 | 0.8551489 |
| Lad1       | 1.9564137 | 1.8648172 | 1.8833063 | 1.5926203 | 1.6124392 | 1.63318   |
| Lrrk2      | 0.6924286 | 0.8549762 | 0.7935842 | 1.0859446 | 1.0713298 | 1.0897852 |
| Mas11      | 0.0872495 | 0.1162762 | 0.053234  | 0.4786429 | 0.4565373 | 0.5003035 |
| Atox1      | 2.066114  | 1.9933985 | 2.0062583 | 1.6269084 | 1.7467125 | 1.7008482 |
| Hcfc1r1    | 1.8706017 | 1.8603322 | 1.877251  | 1.5434431 | 1.6035463 | 1.5069238 |

|            |           |           |           |           |           |           |
|------------|-----------|-----------|-----------|-----------|-----------|-----------|
| LOC103690C | 1.3731102 | 1.160845  | 1.2622037 | 1.6553061 | 1.6150986 | 1.7133582 |
| Gcat       | 1.7875874 | 1.6818642 | 1.7290357 | 1.3884548 | 1.4729902 | 1.3751559 |
| Paxbp1     | 0.8190471 | 0.8504752 | 0.8333425 | 1.1653537 | 1.0875534 | 1.1284283 |
| Park7      | 2.5245528 | 2.4085707 | 2.4471603 | 2.1627901 | 2.1608677 | 2.1630592 |
| Polr3k     | 1.5603968 | 1.6203446 | 1.6520751 | 1.2902754 | 1.3198139 | 1.3086729 |
| Raph1      | 0.2818608 | 0.3570114 | 0.2972284 | 0.6116873 | 0.6228537 | 0.6142446 |
| Fem1b      | 0.678974  | 0.7058217 | 0.6316494 | 1.0771315 | 1.0762243 | 1.0509053 |
| Cyp2d2     | 2.3601927 | 2.5245122 | 2.4407692 | 1.9423333 | 1.8478275 | 2.1776738 |
| Ndufs7     | 2.3819513 | 2.2461363 | 2.3235957 | 1.9633111 | 2.0451007 | 1.9538255 |
| Dennd5b    | 0.6090063 | 0.6056284 | 0.6167568 | 0.9603592 | 0.9377611 | 0.8931272 |
| Mob3b      | 0.560542  | 0.5029936 | 0.4831356 | 0.8275677 | 0.9736018 | 0.9649558 |
| Foxo1      | 0.7068491 | 0.7687668 | 0.7610088 | 1.0936895 | 1.0719414 | 1.0977482 |
| Rasal2     | 0.232829  | 0.2300664 | 0.1939516 | 0.5617951 | 0.5547958 | 0.5395626 |
| Dab2       | 1.9458041 | 1.8932915 | 1.8838602 | 2.2429836 | 2.1671914 | 2.2455333 |
| Taf1       | 0.5778043 | 0.7035997 | 0.6430063 | 0.9118886 | 0.9146736 | 0.9428293 |
| Sema3c     | 0.5859174 | 0.7543003 | 0.6949015 | 1.0169754 | 0.9542735 | 1.0419963 |
| 7-Mar      | 1.1142871 | 1.1955424 | 1.2436615 | 1.4924726 | 1.4788115 | 1.4866915 |
| RGD131159E | 0.5039759 | 0.492147  | 0.5041801 | 0.773341  | 0.7583752 | 0.7283818 |
| Cers4      | 0.3421164 | 0.3511099 | 0.3099068 | 0.7123355 | 0.7419061 | 0.7592883 |
| Smcr8      | 0.8532722 | 0.8427782 | 0.8170922 | 1.156401  | 1.1191319 | 1.1270146 |
| Emc10      | 1.9363157 | 1.9187279 | 1.9333311 | 1.6084525 | 1.6937266 | 1.5957244 |
| Cdc34      | 1.7302237 | 1.7019267 | 1.7182093 | 1.4175573 | 1.4614814 | 1.4026595 |
| Smchd1     | 0.4439443 | 0.6152983 | 0.5183635 | 0.8268597 | 0.8203145 | 0.8605721 |
| Pura       | 0.4921468 | 0.5183105 | 0.5239657 | 0.7644436 | 0.7333227 | 0.7487362 |
| Pclo       | 0.0721581 | 0.0736576 | 0.0885667 | 0.2613389 | 0.2363473 | 0.2946308 |
| Tsc22d2    | 0.6805862 | 0.6522204 | 0.6304333 | 0.9875182 | 0.9291089 | 0.9157663 |
| Ndufb7     | 2.271344  | 2.1815364 | 2.1905655 | 1.8971739 | 1.9513349 | 1.8728288 |
| Greb1      | 0.4241734 | 0.4782846 | 0.4014923 | 0.7565768 | 0.7593941 | 0.6842518 |
| Ttc39b     | 0.6207457 | 0.6222421 | 0.554726  | 0.9075673 | 0.9134077 | 0.9582277 |
| Fat4       | 0.024853  | 0.0307516 | 0.0364698 | 0.1525177 | 0.1499385 | 0.1971088 |
| FAM120C    | 0.4313005 | 0.4691277 | 0.4935522 | 0.7124645 | 0.6794809 | 0.7298895 |
| Lamc3      | 1.0131855 | 0.9119649 | 0.9957898 | 0.5733152 | 0.6872962 | 0.7299308 |
| Trio       | 0.6680553 | 0.7322296 | 0.7134461 | 0.9810724 | 1.0124188 | 0.9237706 |
| Col6a2     | 1.2123783 | 1.3405709 | 1.246941  | 1.034172  | 0.9260557 | 0.9739727 |
| Dzip3      | 0.1583991 | 0.2849525 | 0.2883001 | 0.608178  | 0.6390058 | 0.625214  |
| Foxn2      | 0.8424074 | 0.9799128 | 0.8836524 | 1.244484  | 1.2581181 | 1.2006225 |
| Usp37      | 0.4336953 | 0.5508776 | 0.4664827 | 0.7952224 | 0.7312827 | 0.7880795 |
| Tra2a      | 0.9520703 | 1.1551242 | 1.0434604 | 1.4265372 | 1.3586416 | 1.3870275 |
| Arid5b     | 0.4680574 | 0.5274452 | 0.5649732 | 0.8706344 | 0.9326546 | 0.8270599 |
| Eml5       | 0.1696183 | 0.1830215 | 0.2179048 | 0.4707824 | 0.4881495 | 0.5199119 |
| Aldh6a1    | 2.2838303 | 2.2122551 | 2.3251446 | 2.6028521 | 2.5928538 | 2.5779546 |
| Mtmr9      | 0.5618804 | 0.6498408 | 0.6395563 | 0.9949924 | 1.0200129 | 1.0380933 |
| Pi4k2b     | 0.9619129 | 1.0242791 | 1.0633169 | 1.3414604 | 1.3492023 | 1.3410955 |
| Orc3       | 0.6328645 | 0.681136  | 0.725542  | 0.9885969 | 0.9533842 | 1.0621766 |
| Phlpp2     | 0.42697   | 0.4821865 | 0.4781025 | 0.8187513 | 0.8340857 | 0.7707707 |
| Eps15      | 0.9960994 | 1.0668783 | 0.9775644 | 1.3156765 | 1.2597606 | 1.338731  |
| LOC679818  | 0.6758968 | 0.3730496 | 0.5982421 | 1.027618  | 1.0128037 | 1.12697   |
| Sntb2      | 0.3884873 | 0.3595662 | 0.3710913 | 0.8639858 | 0.9158129 | 0.8123628 |
| Hmg20b     | 1.6767809 | 1.5575995 | 1.6181489 | 1.2847353 | 1.3574426 | 1.3091734 |
| Atxn7      | 0.6285407 | 0.7233583 | 0.6470036 | 0.9407774 | 0.9105822 | 0.9577301 |
| Mpdz       | 0.5466408 | 0.6560626 | 0.5334111 | 0.8410918 | 0.8909492 | 0.8726529 |

|            |           |           |           |           |           |           |
|------------|-----------|-----------|-----------|-----------|-----------|-----------|
| Bri3       | 2.1349386 | 2.0280642 | 2.0801182 | 1.7682146 | 1.8221071 | 1.7628453 |
| Vps50      | 0.690977  | 0.7295537 | 0.7436705 | 1.0342149 | 1.032995  | 1.0471285 |
| Vps13b     | 0.4475614 | 0.5966559 | 0.535503  | 0.8426657 | 0.801066  | 0.7665805 |
| Pgls       | 1.4156721 | 1.2744789 | 1.3346659 | 0.962259  | 1.0749807 | 0.9782577 |
| Ago2       | 0.3475129 | 0.4283769 | 0.3655882 | 0.8474262 | 0.8276078 | 0.7669025 |
| Setbp1     | 0.2328787 | 0.3240309 | 0.2854693 | 0.5383204 | 0.4982431 | 0.5694472 |
| Tet3       | 0.3559086 | 0.3388113 | 0.357184  | 0.5655419 | 0.5686167 | 0.5838183 |
| Ppargcla   | 0.977306  | 1.0624126 | 1.1182902 | 1.3733859 | 1.3867313 | 1.3219499 |
| Fmn1       | 0.0636337 | 0.0628045 | 0.0612745 | 0.2514341 | 0.297583  | 0.2883474 |
| Npr3       | 0.8185545 | 0.8945477 | 0.7988444 | 1.1658511 | 1.0739096 | 1.1351119 |
| Wdr19      | 0.648337  | 0.660644  | 0.6544091 | 0.9180871 | 0.9118421 | 1.0064885 |
| Dis3       | 0.6019151 | 0.7098862 | 0.6613806 | 0.9626159 | 0.9671631 | 1.0036678 |
| Elov17     | 1.0907853 | 1.2396729 | 1.2294949 | 1.5383555 | 1.5826678 | 1.5631085 |
| Amdhd2     | 1.6282383 | 1.5073866 | 1.6107347 | 1.3153171 | 1.2626304 | 1.2876847 |
| Zfp771     | 1.6995209 | 1.5441364 | 1.6513942 | 1.307082  | 1.3608292 | 1.2707488 |
| Ninj1      | 2.2776768 | 2.0769466 | 2.1601111 | 1.8525441 | 1.8564954 | 1.8150184 |
| Fbxo30     | 0.643186  | 0.6709403 | 0.6636807 | 0.9709866 | 0.8992943 | 0.9973203 |
| Ccdc124    | 1.7015888 | 1.6441939 | 1.6298306 | 1.3302858 | 1.4163695 | 1.3677224 |
| Casp8ap2   | 0.2901508 | 0.3588709 | 0.3105947 | 0.5968176 | 0.6018488 | 0.6364063 |
| LOC103690  | 0.0077895 | 0.0065452 | 0.0113662 | 0.0728633 | 0.2345049 | 0.227771  |
| Xpnp3      | 0.6067409 | 0.702241  | 0.65093   | 0.9845082 | 0.954868  | 0.9775236 |
| RGD1309621 | 0.6113804 | 0.7248067 | 0.7582935 | 1.033425  | 0.9515969 | 0.9879158 |
| Neur13     | 1.3610186 | 1.4389258 | 1.3497299 | 1.0223691 | 1.1289088 | 1.0508898 |
| Bag3       | 1.5998251 | 1.4653234 | 1.4696014 | 1.2258182 | 1.2028872 | 1.234098  |
| Trim33     | 0.5675811 | 0.6549541 | 0.5935875 | 0.8964522 | 0.8071529 | 0.8887079 |
| Rfx3       | 0.2466088 | 0.3123974 | 0.2926911 | 0.5828516 | 0.5464474 | 0.5646629 |
| Rnf13      | 0.8208007 | 0.8527535 | 0.9192827 | 1.1822764 | 1.1901128 | 1.2492863 |
| Mospd2     | 0.8541848 | 0.9609844 | 0.8793286 | 1.2074434 | 1.1432982 | 1.2389732 |
| Mcoln3     | 0.9750248 | 1.1508851 | 1.092264  | 1.4949031 | 1.7451037 | 1.3862111 |
| Ypel2      | 0.7016839 | 0.7518307 | 0.5644701 | 1.1775058 | 1.0172227 | 0.9923837 |
| Lrrc40     | 0.7270338 | 0.8144516 | 0.7596302 | 1.0423153 | 1.0298246 | 1.104286  |
| Slc39a9    | 1.0881575 | 1.1296491 | 1.1654321 | 1.424173  | 1.429718  | 1.4177804 |
| Ate1       | 0.4162216 | 0.4093744 | 0.4420314 | 0.745261  | 0.7650379 | 0.787047  |
| Nbea       | 0.4272869 | 0.5167899 | 0.4832888 | 0.6980392 | 0.6825655 | 0.7884889 |
| Fbxo31     | 1.5396575 | 1.5196715 | 1.5459299 | 1.230206  | 1.3222986 | 1.2060579 |
| Cnot61     | 0.6169741 | 0.7957396 | 0.7240851 | 0.9732827 | 1.0356926 | 1.0264646 |
| Parp14     | 0.5555908 | 0.6352015 | 0.565931  | 0.9023173 | 0.782185  | 0.8958261 |
| Dmtf1      | 0.8163519 | 0.7964745 | 0.7830678 | 1.083669  | 1.0465998 | 1.0997493 |
| Shank2     | 0.2578693 | 0.2497232 | 0.2860608 | 0.458703  | 0.5728878 | 0.5368091 |
| Spata9     | 0.5075478 | 0.5768767 | 0.5806049 | 0.9903239 | 0.9872882 | 1.0201505 |
| Babaml     | 1.8487776 | 1.6863749 | 1.7848414 | 1.3847854 | 1.5230638 | 1.4165993 |
| Cltb       | 1.8064769 | 1.7621639 | 1.7807132 | 1.4416841 | 1.5614605 | 1.4584251 |
| LOC1009124 | 0.2155634 | 0.2521178 | 0.2660723 | 0.5417113 | 0.6201467 | 0.6249451 |
| Usp53      | 0.5452106 | 0.5810587 | 0.6267598 | 0.8148517 | 0.8709328 | 0.8746504 |
| Zswim6     | 0.4047414 | 0.4191404 | 0.4501861 | 0.7265816 | 0.7467817 | 0.7775673 |
| Pik3cb     | 0.7274573 | 0.8136802 | 0.81357   | 1.0739939 | 1.071104  | 1.0310595 |
| Nipal      | 0.6185187 | 0.6973593 | 0.6585255 | 1.0418982 | 0.9792198 | 1.0319203 |
| Cep851     | 0.0807939 | 0.1199974 | 0.0775061 | 0.355018  | 0.3776531 | 0.433028  |
| Ppip5k2    | 0.4431756 | 0.5029243 | 0.398319  | 0.8895651 | 0.9253746 | 0.9006854 |
| Lsm4       | 1.6054279 | 1.5390516 | 1.5349583 | 1.1836306 | 1.2828688 | 1.1647588 |
| Abi2       | 0.7307124 | 0.8214596 | 0.8015456 | 1.1050856 | 1.0313379 | 1.0739996 |

|            |           |           |           |           |           |           |
|------------|-----------|-----------|-----------|-----------|-----------|-----------|
| Ar113b     | 0.3610254 | 0.4043212 | 0.4424846 | 0.6748145 | 0.7325531 | 0.8208142 |
| Mcrip1     | 1.5767076 | 1.4802153 | 1.5782392 | 1.2256346 | 1.2723123 | 1.2568735 |
| Hhip       | 0.2742789 | 0.2467706 | 0.1976072 | 0.76275   | 0.792596  | 0.554764  |
| Shoc2      | 0.8530442 | 0.9488234 | 0.913518  | 1.1984676 | 1.2207198 | 1.2219379 |
| LOC1001348 | 2.0868667 | 2.219465  | 2.3179687 | 1.924911  | 1.7799276 | 1.9117334 |
| Lrrcc1     | 0.792749  | 0.8664722 | 0.9278995 | 1.2055308 | 1.1181537 | 1.1647417 |
| Hba2       | 2.3831667 | 2.5067178 | 2.566934  | 2.2088227 | 1.8559254 | 1.9834015 |
| Arid4b     | 0.0460947 | 0.0581089 | 0.0404671 | 0.3944566 | 0.2048952 | 0.2931254 |
| Pdxdc1     | 0.8082103 | 0.8412907 | 0.7530165 | 1.0283924 | 1.1021403 | 1.1319258 |
| Hook3      | 0.5433039 | 0.5815749 | 0.581867  | 0.9836359 | 0.8503731 | 0.9751251 |
| Ptbp2      | 0.5835124 | 0.6350646 | 0.6195308 | 0.9100462 | 0.9216543 | 0.9591018 |
| Sf3a2      | 1.3215921 | 1.2865558 | 1.3690324 | 1.0420055 | 1.039995  | 1.0446147 |
| Crybg3     | 0.2071592 | 0.3314463 | 0.2866936 | 0.5770905 | 0.5714448 | 0.5119872 |
| Ints6      | 0.7071286 | 0.8166396 | 0.6910824 | 1.0643205 | 0.9926769 | 1.024917  |
| Socs4      | 0.3397112 | 0.4157512 | 0.3446803 | 0.7897763 | 0.804284  | 0.825334  |
| Cldn20     | 0.0112177 | 0         | 0.005515  | 0.1621919 | 0.2172878 | 0.1946953 |
| Rab5a11    | 0.8851952 | 0.9124241 | 0.8723083 | 1.1795169 | 1.1730501 | 1.2317635 |
| LOC1025495 | 0.5747192 | 0.571595  | 0.5767879 | 0.9433778 | 0.9458923 | 0.9737403 |
| Esco1      | 0.7543636 | 0.8316416 | 0.7650889 | 1.1055334 | 1.0181252 | 1.0605709 |
| LOC1036909 | 0.0430577 | 0.1110949 | 0.080488  | 0.5568969 | 0.5240257 | 0.5552251 |
| Smc4       | 0.6743868 | 0.8411152 | 0.7410435 | 1.0459334 | 1.0460644 | 1.0670753 |
| Fam76b     | 0.6049992 | 0.6789663 | 0.7247121 | 1.0274827 | 0.9904697 | 1.0273604 |
| Ints2      | 0.3121089 | 0.3863057 | 0.3566769 | 0.6842349 | 0.6302972 | 0.6502521 |
| Fth1       | 3.7767729 | 3.8954411 | 3.8842852 | 3.5119447 | 3.6309624 | 3.5249582 |
| Tmem207    | 0.7621456 | 0.9900712 | 0.8907455 | 1.1746458 | 1.4513811 | 1.389535  |
| Cldn8      | 1.2710253 | 1.433047  | 1.4218635 | 1.62773   | 1.7327067 | 1.7070778 |
| Oxr1       | 0.982675  | 1.2014709 | 1.1668799 | 1.416518  | 1.4588341 | 1.4673923 |
| Ttbk2      | 0.2387385 | 0.3148881 | 0.2731505 | 0.5600457 | 0.5312023 | 0.5370798 |
| Qprt       | 1.9571271 | 1.830173  | 1.988313  | 1.6160252 | 1.6634034 | 1.5944014 |
| Rasa1      | 0.739006  | 0.8652959 | 0.7902038 | 1.1047659 | 1.0727361 | 1.1100428 |
| Sacs       | 0.0751557 | 0.0866533 | 0.0775729 | 0.2607102 | 0.2574985 | 0.2268008 |
| Creb1      | 0.480417  | 0.620045  | 0.5334491 | 0.8554174 | 0.8103917 | 0.8501265 |
| Morc3      | 0.6329486 | 0.8178431 | 0.7562005 | 1.0082514 | 1.0407992 | 1.0966192 |
| Kcnj10     | 0.6760619 | 0.5989524 | 0.5807623 | 0.9649363 | 0.971455  | 1.0577643 |
| Cd28       | 0.5192655 | 0.5805927 | 0.4720525 | 1.0207201 | 0.7943457 | 0.9778537 |
| Zfp317     | 0.5707642 | 0.6199914 | 0.6117456 | 0.8566271 | 0.8876418 | 0.9589514 |
| Ap4e1      | 0.335912  | 0.4305329 | 0.4038766 | 0.7427288 | 0.7352583 | 0.787741  |
| Pard3b     | 0.4913197 | 0.4403907 | 0.4708474 | 0.8391526 | 0.803654  | 0.7979878 |
| Rab11fip2  | 0.4283348 | 0.4664951 | 0.4664611 | 0.8822294 | 0.9023452 | 0.9298876 |
| Ythdc2     | 0.3041871 | 0.4060584 | 0.417163  | 0.6656876 | 0.6508432 | 0.6796662 |
| Senp7      | 0.4440958 | 0.5171224 | 0.4866041 | 0.7699062 | 0.7643172 | 0.804563  |
| Ocell      | 1.4692846 | 1.301413  | 1.3449252 | 1.0350737 | 1.0664119 | 1.0245576 |
| Timm13     | 2.0510983 | 1.9087642 | 1.9970066 | 1.6832431 | 1.7259648 | 1.581568  |
| Adm2       | 1.8089792 | 1.6204687 | 1.7109512 | 1.3195543 | 1.2807283 | 1.4765454 |
| Atr        | 0.3263241 | 0.365841  | 0.3701203 | 0.5961319 | 0.5783581 | 0.6349881 |
| Slc22a22   | 1.355016  | 1.4373021 | 1.4552078 | 1.741723  | 1.6140923 | 1.8330144 |
| Lhpp       | 1.9112031 | 1.8553297 | 1.8734545 | 1.5270485 | 1.6716442 | 1.5765484 |
| Mpv1712    | 1.7317472 | 1.6557237 | 1.6403727 | 1.3729381 | 1.4125284 | 1.4007972 |
| Acp5       | 1.9917381 | 1.8106169 | 1.8853204 | 1.5237675 | 1.6166889 | 1.6313274 |
| Rrm2b      | 0.699567  | 0.819096  | 0.7683412 | 1.1816263 | 1.1579001 | 1.2392608 |
| Ikzf2      | 0.0725359 | 0.1645731 | 0.1266111 | 0.3977551 | 0.3732129 | 0.4493828 |

|            |           |           |           |           |           |           |
|------------|-----------|-----------|-----------|-----------|-----------|-----------|
| Ikbkg      | 0.5332807 | 0.5722489 | 0.5688564 | 0.8191693 | 0.7750019 | 0.8561213 |
| Gtf2a1     | 0.6044234 | 0.7059825 | 0.7105513 | 1.0033908 | 0.9801282 | 0.9829832 |
| Hspa41     | 0.493801  | 0.5597305 | 0.5709676 | 0.8688617 | 0.7160424 | 0.8701702 |
| Kdm5d      | 0.5745107 | 0.7019594 | 0.6693415 | 0.9119166 | 0.8831512 | 0.9479941 |
| Mxra7      | 1.2977459 | 1.2717513 | 1.3732087 | 1.0079884 | 1.0195813 | 1.0714036 |
| Cav2       | 0.8945906 | 1.1253536 | 1.0180259 | 1.3549702 | 1.3178862 | 1.3515874 |
| Arid4a     | 0.6070913 | 0.7290598 | 0.6180196 | 0.9352283 | 0.9424216 | 0.9194531 |
| Carf       | 0.3575603 | 0.4385929 | 0.3923343 | 0.7301307 | 0.7476225 | 0.6664522 |
| Fgd6       | 0.1148659 | 0.1424483 | 0.1125187 | 0.3777672 | 0.3562012 | 0.4130425 |
| Thsd7a     | 0.1843602 | 0.2803866 | 0.2015999 | 0.5087102 | 0.5330517 | 0.4791174 |
| Scrn2      | 1.7702485 | 1.7573322 | 1.6618244 | 1.2941851 | 1.4644543 | 1.5008664 |
| Tma7       | 1.3034122 | 0.1129168 | 1.1844575 | 0.0521434 | 0.0132859 | 0.0716254 |
| Pcdh17     | 0.4644378 | 0.5955254 | 0.6413813 | 1.0219785 | 0.7783064 | 0.9321916 |
| Ccdc15     | 0.0164477 | 0.0206013 | 0.0372454 | 0.2111552 | 0.1893874 | 0.191115  |
| Ccdc85b    | 1.453696  | 1.3417727 | 1.4146577 | 1.0299924 | 1.0385947 | 1.0612075 |
| Bola1      | 1.6231039 | 1.5312212 | 1.608313  | 1.1777395 | 1.308895  | 1.2406569 |
| LOC679894  | 0.1857221 | 0.2357213 | 0.2410876 | 0.4677793 | 0.3810303 | 0.4690759 |
| Sectmlb    | 0.9370753 | 1.0185166 | 1.0449394 | 0.5500413 | 0.635318  | 0.4925288 |
| Robo2      | 0.3536165 | 0.3832264 | 0.3646241 | 0.6271958 | 0.6184976 | 0.5537045 |
| Trim23     | 0.7115573 | 0.8087729 | 0.7871744 | 1.0371762 | 1.0268174 | 1.0721057 |
| Smc5       | 0.4731476 | 0.57909   | 0.5083506 | 0.7994804 | 0.7613902 | 0.8245171 |
| Gng7       | 1.4741627 | 1.1434078 | 1.4828242 | 1.007821  | 0.7680578 | 0.987145  |
| F5         | 0.5986672 | 0.673152  | 0.8013741 | 0.9371692 | 1.0400106 | 1.0361456 |
| Mier3      | 0.4217973 | 0.5991273 | 0.5113464 | 0.8362001 | 0.7784388 | 0.8589422 |
| Yod1       | 0.3011971 | 0.2678813 | 0.3837773 | 0.8365602 | 0.9416025 | 0.8403375 |
| Atad2b     | 0.101065  | 0.1237758 | 0.1772135 | 0.4735763 | 0.4860536 | 0.5565424 |
| Srgap3     | 0.3661327 | 0.4481364 | 0.3776396 | 0.6478835 | 0.7864216 | 0.7976595 |
| Gchfr      | 2.107364  | 2.1235908 | 2.0652728 | 1.7491222 | 1.9043322 | 1.7312575 |
| Bach1      | 0.4375964 | 0.5291866 | 0.493226  | 0.8553268 | 0.822258  | 0.8235568 |
| Apoh       | 0.8461115 | 1.2523637 | 1.0653095 | 0.1792173 | 0.5221777 | 0.2082867 |
| Psd3       | 0.2237478 | 0.2515315 | 0.2015954 | 0.4758015 | 0.407182  | 0.4597312 |
| Tgfb1      | 1.3412467 | 1.3899395 | 1.2205771 | 1.0190466 | 0.9811243 | 1.0108771 |
| Pgap1      | 0.2850406 | 0.2846241 | 0.2786781 | 0.654118  | 0.5951793 | 0.6572531 |
| Zbtb6      | 0.5351057 | 0.6544828 | 0.5908466 | 0.8828337 | 0.8870353 | 0.9375916 |
| LOC680520  | 0.5456545 | 0.4855986 | 0.4971856 | 0.804892  | 0.8176375 | 0.7533227 |
| Dpy1914    | 0.4215493 | 0.5339826 | 0.4938702 | 0.806705  | 0.7835813 | 0.8162462 |
| Cidec      | 1.6916392 | 1.8279931 | 1.78159   | 1.3250739 | 1.5643472 | 1.3980095 |
| Wrn        | 0.4665915 | 0.5021562 | 0.445914  | 0.7357726 | 0.6515734 | 0.7372036 |
| Ccdc39     | 0.5085047 | 0.4884336 | 0.5212102 | 0.7831618 | 0.7717958 | 0.8892171 |
| Greb11     | 0.146951  | 0.1358644 | 0.1459318 | 0.404718  | 0.3718742 | 0.3843262 |
| Rps28      | 2.0758321 | 2.0683123 | 2.009401  | 1.7629625 | 1.8136033 | 1.6915705 |
| Bag4       | 0.5967613 | 0.6897676 | 0.7392411 | 0.9890965 | 1.1214058 | 1.0302789 |
| Sp4        | 0.1956425 | 0.2083476 | 0.2372697 | 0.5043558 | 0.5330615 | 0.6394259 |
| LOC1009105 | 1.6550229 | 1.6846398 | 1.5398363 | 1.9033357 | 1.9703549 | 1.9465292 |
| Zfp236     | 0.386635  | 0.5038348 | 0.4906993 | 0.6890599 | 0.7201432 | 0.69835   |
| Zmat1      | 0.5171656 | 0.5701963 | 0.5814084 | 0.8034377 | 0.7806652 | 0.8448851 |
| Hspa13     | 0.6060524 | 0.7680639 | 0.7305597 | 1.1070117 | 1.0607846 | 1.1364877 |
| Alms1      | 0.3410998 | 0.4117146 | 0.407803  | 0.5848667 | 0.6037588 | 0.6122709 |
| Ecml       | 1.3612362 | 1.2763153 | 1.2448446 | 1.0150692 | 0.8303906 | 1.0482185 |
| Manea      | 0.5455079 | 0.7211071 | 0.6478482 | 0.9952751 | 0.8988793 | 1.0041295 |
| Pias1      | 0.7569901 | 0.9044565 | 0.8900206 | 1.1868725 | 1.1453359 | 1.1632912 |



|            |           |           |           |           |           |           |
|------------|-----------|-----------|-----------|-----------|-----------|-----------|
| Kifc1      | 0.8832447 | 0.8295616 | 0.880274  | 0.3521292 | 0.5056332 | 0.235022  |
| LOC1036905 | 0.4021902 | 0.5006142 | 0.4615926 | 0.6909168 | 0.6592987 | 0.7411807 |
| Trappc6a   | 2.051005  | 1.8813993 | 1.9750443 | 1.6104084 | 1.7454504 | 1.566723  |
| Scand1     | 2.2620232 | 2.0581829 | 2.1611685 | 1.8015005 | 1.9222663 | 1.782112  |
| Scn1b      | 1.8407031 | 1.5033633 | 1.7148284 | 1.1975712 | 1.3179119 | 1.395785  |
| Nhs12      | 0.128975  | 0.1901996 | 0.1715943 | 0.3879166 | 0.3959768 | 0.3329818 |
| Dip2b      | 0.4673603 | 0.5341189 | 0.4745914 | 0.7206513 | 0.7443988 | 0.7516022 |
| Gprin3     | 0.1675865 | 0.2935495 | 0.289495  | 0.4820198 | 0.6538737 | 0.5908322 |
| Tmem238    | 1.3473121 | 1.2177347 | 1.2994646 | 0.9955823 | 1.038505  | 1.0005506 |
| Plce1      | 0.3539979 | 0.3933981 | 0.3930576 | 0.6266032 | 0.567391  | 0.5904834 |
| Hspb1      | 1.4821452 | 1.6103627 | 1.4580989 | 1.2360012 | 1.1385282 | 1.2316281 |
| RGD1560248 | 0.6030767 | 0.7353616 | 0.6101824 | 0.957321  | 0.8877719 | 0.9225065 |
| Tmem160    | 1.542288  | 1.4417934 | 1.4552273 | 1.1211476 | 1.1771606 | 1.1485398 |
| Gnaq       | 0.7547682 | 0.9294818 | 0.8011618 | 1.2183059 | 1.2678704 | 1.2559266 |
| Abca5      | 0.1950713 | 0.2376883 | 0.2163348 | 0.4824363 | 0.463176  | 0.4811167 |
| Folh1      | 1.1145245 | 0.9706316 | 1.0367628 | 1.3991394 | 1.275517  | 1.3385241 |
| Smoc2      | 0.9553242 | 0.9733021 | 0.8701525 | 0.5810449 | 0.5563592 | 0.692857  |
| Klh13      | 0.6486468 | 0.5764827 | 0.5974054 | 0.9728644 | 1.016323  | 1.0037693 |
| Tagln      | 2.0534138 | 2.1776002 | 1.8996244 | 1.7515393 | 1.6865201 | 1.7882328 |
| Guca2a     | 1.3273816 | 1.2540195 | 1.2742337 | 0.8080952 | 0.8276915 | 0.8194494 |
| Zbtb16     | 0.9306426 | 1.0887257 | 0.9542395 | 0.7532447 | 0.780766  | 0.6689065 |
| Cd74       | 2.8839183 | 2.8741526 | 2.5882405 | 2.4389188 | 2.3986104 | 2.5091131 |
| Nup58      | 0.7045734 | 0.7590291 | 0.766137  | 1.0741378 | 1.0905807 | 1.0127366 |
| Rbm41      | 0.0873266 | 0.1571653 | 0.1752986 | 0.4820014 | 0.4722035 | 0.5324148 |
| Ckb        | 2.4727083 | 2.2880159 | 2.4080234 | 1.9792037 | 2.1713025 | 2.0746542 |
| G2e3       | 0.1722117 | 0.2077438 | 0.1880633 | 0.4139186 | 0.4373765 | 0.4739026 |
| Bmpr1b     | 0.5438494 | 0.574467  | 0.5984223 | 0.8349893 | 0.8671103 | 0.8871141 |
| Slc25a29   | 1.2439693 | 1.0694411 | 1.2472342 | 0.8722705 | 0.8537154 | 0.9104008 |
| Hba-a1     | 1.3042231 | 1.4023396 | 1.1776048 | 0.7539339 | 0.7627098 | 0.7565366 |
| Mcurl      | 0.9702836 | 1.0110649 | 1.0170307 | 1.3016223 | 1.3767954 | 1.3549746 |
| Pggt1b     | 0.613701  | 0.732988  | 0.7222913 | 0.9813546 | 0.9537071 | 1.0504843 |
| Plagl1     | 0.188128  | 0.229619  | 0.3109122 | 0.5011674 | 0.5733073 | 0.6547579 |
| Jrkl       | 0.3820579 | 0.517325  | 0.4565356 | 0.8047675 | 0.7882593 | 0.83388   |
| Pomc       | 1.007742  | 0.9264026 | 1.0033834 | 0.4947095 | 0.5354779 | 0.5204051 |
| Arap2      | 0.3084926 | 0.3895257 | 0.3210577 | 0.6536601 | 0.5492917 | 0.6107062 |
| Zim1       | 0.0673978 | 0.0651041 | 0.1049338 | 0.297042  | 0.3408458 | 0.3271607 |
| Tlkl       | 0.2393644 | 0.2468524 | 0.292831  | 0.6217431 | 0.5369406 | 0.5634977 |
| Mapklip11  | 0.6298972 | 0.6684452 | 0.566722  | 0.9005734 | 0.9224185 | 0.9813781 |
| Phactr2    | 0.494124  | 0.5916134 | 0.5603598 | 0.8422814 | 0.7608131 | 0.8396776 |
| Apoe       | 2.9650354 | 2.8136643 | 2.8523304 | 2.6746837 | 2.4885892 | 2.4888977 |
| Glis3      | 0.7473858 | 0.805655  | 0.8072111 | 1.1336444 | 1.1880067 | 1.1471653 |
| LOC1025554 | 1.9042716 | 2.2409949 | 2.1709479 | 1.7518055 | 1.8198991 | 1.8009695 |
| Cep290     | 0.1633928 | 0.2942809 | 0.2471666 | 0.52102   | 0.4598199 | 0.5485997 |
| LOC501038  | 0.8858668 | 0.9873209 | 0.9588621 | 1.2378525 | 1.2739441 | 1.2832379 |
| Nup155     | 0.5249714 | 0.6137204 | 0.5473938 | 0.8035951 | 0.8340189 | 0.86637   |
| Dennd4a    | 0.3088811 | 0.3373972 | 0.2956632 | 0.588517  | 0.5169494 | 0.5528117 |
| P2rx4      | 1.4257306 | 1.56898   | 1.587454  | 1.3351657 | 1.0695112 | 1.1311095 |
| Trpv3      | 0.1802057 | 0.1573378 | 0.1674018 | 0.4491189 | 0.4089408 | 0.4084406 |
| Hprt1      | 0.2040437 | 0.150571  | 0.1057401 | 1.1504722 | 1.146575  | 0.2068519 |
| Tmod2      | 0.3877271 | 0.3359872 | 0.1729321 | 0.7570113 | 0.6747039 | 0.7392923 |
| Cebpb      | 1.7817716 | 1.6341675 | 1.5983441 | 1.3909854 | 1.4244954 | 1.2559002 |

|            |           |           |           |           |           |           |
|------------|-----------|-----------|-----------|-----------|-----------|-----------|
| Kdm6a      | 0.056787  | 0.1020874 | 0.1027659 | 0.3265323 | 0.3378923 | 0.3927859 |
| Gna13      | 0.7159993 | 0.8371646 | 0.8013791 | 1.2117651 | 1.1507395 | 1.1661199 |
| LOC1025485 | 0.5812974 | 0.6193284 | 0.6190145 | 0.8630328 | 0.9082338 | 0.9065477 |
| Abcc8      | 0.5552115 | 0.578695  | 0.5061276 | 0.1171623 | 0.2769158 | 0.2205222 |
| LOC1083529 | 0.0566062 | 0.1369817 | 0.0771017 | 0.4201865 | 0.3829632 | 0.3584365 |
| Sds        | 1.1401946 | 1.3493439 | 1.2567555 | 0.7910864 | 0.9702077 | 0.8446025 |
| Zbtb34     | 0.1176021 | 0.1352347 | 0.1177285 | 0.4308124 | 0.4330949 | 0.3986839 |
| Rnpc3      | 0.4720844 | 0.5356335 | 0.4509437 | 0.8477635 | 0.8015114 | 0.7943544 |
| Lnpep      | 0.0639658 | 0.0609738 | 0.0669607 | 0.3564347 | 0.2637371 | 0.1849029 |
| As1        | 2.2720389 | 2.0611364 | 2.1364478 | 1.9168639 | 1.8726215 | 1.8476547 |
| Hecw2      | 0.229633  | 0.2358841 | 0.2218846 | 0.4528467 | 0.4228684 | 0.473277  |
| Gpm6a      | 1.0741585 | 1.1502597 | 0.9560501 | 1.4552527 | 1.2318471 | 1.4912967 |
| Hnrnp3     | 0.3749793 | 0.4053026 | 0.3963403 | 0.656098  | 0.7597703 | 0.8068256 |
| Arhgef38   | 0.1776438 | 0.1334704 | 0.1636828 | 0.5329264 | 0.4864097 | 0.4808815 |
| Nhs        | 0.4334972 | 0.5571015 | 0.5406465 | 0.8652428 | 0.8344059 | 0.6641252 |
| LOC1003635 | 0.3245385 | 1.8845136 | 0.0938473 | 0.0330726 | 0         | 0.0189027 |
| LOC1003652 | 0.5042267 | 0.3990237 | 0.3926761 | 0.7359945 | 0.7559041 | 0.8245341 |
| Gabpb2     | 0.3141193 | 0.3468    | 0.3196571 | 0.6326063 | 0.5978393 | 0.645274  |
| Atp10b     | 0.0939703 | 0.1419535 | 0.1044922 | 0.3113694 | 0.3227695 | 0.405048  |
| Arsk       | 0.6648142 | 0.7108008 | 0.7465648 | 1.0121722 | 1.0883493 | 1.0819953 |
| Pde7a      | 0.3932007 | 0.5125817 | 0.4796698 | 0.7128361 | 0.7368976 | 0.7066605 |
| Flrt2      | 0.3955859 | 0.5163107 | 0.4806338 | 0.8285559 | 0.6762105 | 0.741141  |
| Tmcc3      | 0.4769933 | 0.6094722 | 0.5485582 | 0.8690711 | 0.789695  | 0.7656194 |
| Cldn3      | 1.2773686 | 1.134368  | 1.3110942 | 0.7205305 | 0.9453942 | 0.9250525 |
| Znrf3      | 0.1818817 | 0.1964605 | 0.2874967 | 0.5523958 | 0.6218249 | 0.6104292 |
| Expn5      | 0.1359712 | 0.18941   | 0.1981295 | 0.3608    | 0.4296991 | 0.3958035 |
| Rad54l2    | 0.3526605 | 0.3790582 | 0.377491  | 0.598368  | 0.5968589 | 0.6474828 |
| Orai1      | 1.4673609 | 1.3297002 | 1.4521863 | 1.0495683 | 1.1428198 | 1.1697715 |
| LOC1025506 | 0.1110158 | 0.1890533 | 0.1251529 | 0.4048225 | 0.4663987 | 0.4719128 |
| Ntmt1      | 1.371999  | 1.2478562 | 1.3002523 | 1.0242287 | 1.0345065 | 1.0048685 |
| Alcam      | 0.7251053 | 0.9503064 | 0.8310996 | 1.1477937 | 1.09512   | 1.2272903 |
| Zfp709     | 0.4778663 | 0.5011094 | 0.4790249 | 0.7374497 | 0.7177599 | 0.7874036 |
| Frem2      | 0.1310457 | 0.2244167 | 0.1797882 | 0.3659306 | 0.4244317 | 0.4317484 |
| RGD1565117 | 0.0124128 | 0.0206326 | 0.0239283 | 0.1885039 | 0.184517  | 0.2071262 |
| Hbal       | 2.8192894 | 2.8470955 | 2.9583212 | 2.681304  | 2.3348253 | 2.4618343 |
| Tsen34     | 0.9580519 | 0.2358221 | 1.1956888 | 0.2019766 | 0.2228845 | 0.183681  |
| Nfia       | 0.7142144 | 0.7806985 | 0.7454168 | 1.0480972 | 1.0641252 | 1.0507954 |
| Snrnp48    | 0.5881232 | 0.6561044 | 0.6743426 | 0.9121052 | 0.974229  | 1.0001592 |
| Calcr1     | 0.5411716 | 0.6901047 | 0.6357998 | 0.8693578 | 0.8696543 | 0.9654286 |
| Borcs6     | 1.2143553 | 1.1569968 | 1.1899671 | 0.8826868 | 0.9660785 | 0.8941877 |
| Zfp62      | 0.4669395 | 0.5577561 | 0.5362849 | 0.7623498 | 0.7386396 | 0.8258116 |
| Thy1       | 1.1352067 | 1.0341694 | 1.0037311 | 0.7557417 | 0.6966645 | 0.6944227 |
| Ubxn2b     | 0.5093405 | 0.592508  | 0.5962443 | 0.8470448 | 0.8041481 | 0.8687243 |
| Zbtb1      | 0.4921486 | 0.5327802 | 0.5162858 | 0.7894334 | 0.7559155 | 0.7225896 |
| Csmd1      | 0.1906466 | 0.2395841 | 0.1555406 | 0.4741384 | 0.3677859 | 0.3737759 |
| Pgr        | 0.0210632 | 0.048882  | 0.0402404 | 0.2662853 | 0.2161102 | 0.1801624 |
| Rsbn11     | 0.5731039 | 0.5945466 | 0.612539  | 0.865887  | 0.8549501 | 0.8723809 |
| Gda        | 0.6043882 | 0.9027445 | 0.6767915 | 1.1985024 | 1.1064089 | 1.1759956 |
| Stx19      | 0         | 0         | 0.0228837 | 0.1752066 | 0.1453869 | 0.2548517 |
| Sass6      | 0.0341599 | 0.0236418 | 0.0280064 | 0.1831057 | 0.1655378 | 0.1362596 |
| Slc7a2     | 0.0279428 | 0.0215484 | 0.0516973 | 0.1615294 | 0.1706785 | 0.2125487 |

|             |           |           |           |           |           |           |
|-------------|-----------|-----------|-----------|-----------|-----------|-----------|
| LOC691170   | 0.4870545 | 0.545219  | 0.5418545 | 0.7487632 | 0.7439944 | 0.8194908 |
| Inafm1      | 1.3632773 | 1.2218634 | 1.2776918 | 0.9010866 | 1.063116  | 0.9745406 |
| Tnfsf15     | 0.2044599 | 0.2316411 | 0.1434953 | 0.7214792 | 0.6961476 | 0.5636513 |
| Sult2b1     | 1.2964151 | 1.1624102 | 1.2181902 | 0.7480505 | 0.9362184 | 0.929312  |
| Klhl42      | 0.4478066 | 0.5506111 | 0.5055468 | 0.7988971 | 0.8067447 | 0.8061258 |
| Tspan1      | 1.2429076 | 1.2499636 | 1.0810391 | 0.9251689 | 0.9385603 | 0.8769843 |
| LOC1009098  | 0.1700301 | 0.2451996 | 0.2207553 | 0.4637417 | 0.4754867 | 0.4773606 |
| Fxr1        | 0.965996  | 1.0664304 | 0.9212398 | 1.2520893 | 1.307764  | 1.3392943 |
| Irs1        | 0.2226404 | 0.2857498 | 0.2903747 | 0.495046  | 0.5530184 | 0.5484831 |
| Abcg313     | 0.7024007 | 0.7475639 | 0.6346347 | 1.0142471 | 0.9277608 | 0.9543741 |
| Thap2       | 0.4942125 | 0.6146281 | 0.5920755 | 0.8496084 | 0.8496935 | 0.7700972 |
| Katnbl1     | 0.2113931 | 0.2661394 | 0.2565857 | 0.6035458 | 0.534125  | 0.5968538 |
| Prex2       | 0.2057251 | 0.2297831 | 0.1600873 | 0.4556442 | 0.381631  | 0.4366423 |
| Ar15b       | 0.5119187 | 0.5692233 | 0.4968465 | 0.8219442 | 0.7658676 | 0.7524165 |
| Lilrb3      | 0.4795733 | 0.6040039 | 0.2903808 | 0.9467265 | 0.8600114 | 0.8280431 |
| F2          | 1.0610505 | 1.4091634 | 1.4261868 | 0.7127384 | 1.0387224 | 0.8555957 |
| Cyb561d2    | 1.3199197 | 1.2239492 | 1.2856786 | 1.0013684 | 1.0062632 | 0.9698263 |
| RGD1310429  | 0.4546643 | 0.580856  | 0.5418232 | 0.834763  | 0.8679526 | 0.9218031 |
| LOC1025510  | 0.0432057 | 0.1306761 | 0.1642905 | 0.4787146 | 0.5437597 | 0.5891775 |
| Traf6       | 0.411865  | 0.4709732 | 0.520254  | 0.8020939 | 0.8008371 | 0.7860958 |
| LOC1036900  | 0.3786467 | 0.213496  | 0.1762999 | 0.7544422 | 0.6984536 | 0.8076698 |
| Lrrc31      | 0.2714457 | 0.3644662 | 0.3393829 | 0.5858347 | 0.5774075 | 0.6666955 |
| Magi2       | 0.1500502 | 0.1753996 | 0.1700492 | 0.4083136 | 0.4341605 | 0.4033863 |
| Zfp597      | 0.2056239 | 0.187205  | 0.2632775 | 0.5878034 | 0.5628363 | 0.6396762 |
| LOC1009116  | 0.1856061 | 0.1415925 | 0.1657683 | 0.7343154 | 1.0241051 | 0.2025127 |
| Abcb11      | 0.5695515 | 0.8279383 | 0.784058  | 0.9013883 | 1.1065553 | 1.2477027 |
| Plcb4       | 0.3371802 | 0.4235749 | 0.3855759 | 0.6074281 | 0.6092962 | 0.6213611 |
| Cyp2d5      | 1.9835738 | 1.9555855 | 2.0663516 | 1.0610927 | 1.3185377 | 1.7456527 |
| RGD1559909  | 1.7339412 | 1.56817   | 1.6294472 | 1.398935  | 1.3439035 | 1.3587369 |
| Fancm       | 0.3122378 | 0.337904  | 0.349717  | 0.560131  | 0.5451629 | 0.5867056 |
| Jund        | 2.2481836 | 1.9595004 | 2.0149768 | 1.792757  | 1.7697973 | 1.795325  |
| Aqp4        | 0.8717127 | 1.222404  | 1.0134684 | 1.3270474 | 1.4421661 | 1.4062242 |
| Nrgn        | 0.9147284 | 0.9611863 | 0.9590985 | 0.5100803 | 0.5296828 | 0.6571772 |
| Prkg1       | 0.0544306 | 0.065141  | 0.0405312 | 0.2558053 | 0.263277  | 0.3032537 |
| Slc4a7      | 0.3503396 | 0.5293236 | 0.5681275 | 0.7893573 | 0.8556604 | 0.7042392 |
| Zfp329      | 0.2788655 | 0.3425432 | 0.3426046 | 0.601634  | 0.5730134 | 0.5720943 |
| Nnat        | 0.4305616 | 0.3907008 | 0.335956  | 0.8011864 | 0.8564638 | 0.8429917 |
| LOC1025538  | 0.0211322 | 0.0315983 | 0.0158815 | 0.1030681 | 0.1219092 | 0.1469423 |
| Stc1        | 0.5325799 | 0.9127012 | 0.8313627 | 1.213602  | 1.604821  | 1.0530218 |
| LOC304239   | 0.005328  | 0.0059563 | 0.0077845 | 0.0924798 | 0.0564066 | 0.0864111 |
| LOC1036899  | 0.387206  | 0.6232872 | 0.43944   | 1.0065787 | 0.9826565 | 0.7252713 |
| LOC10369010 | 0.2499218 | 0.4856904 | 0.3405503 | 0.9153512 | 0.8357985 | 0.8536044 |
| Ston2       | 0.0984968 | 0.1026476 | 0.075719  | 0.2338402 | 0.3438121 | 0.4310158 |
| Slc10a2     | 0.3411328 | 0.5248932 | 0.4163612 | 0.7105259 | 0.7546792 | 0.717466  |
| Srebf1      | 1.5014044 | 1.2417763 | 1.414882  | 1.1436128 | 1.0746364 | 1.1605463 |
| Rex2        | 0.4856346 | 0.6022261 | 0.5142231 | 0.7786607 | 0.7464629 | 0.9028223 |
| Phlda3      | 1.0759584 | 1.1224795 | 1.0925007 | 0.7888071 | 0.7924732 | 0.7897849 |
| Zfp800      | 0.3591253 | 0.5009623 | 0.4657436 | 0.7003702 | 0.7030978 | 0.7617164 |
| Zbtb10      | 0.2738194 | 0.2831742 | 0.2465081 | 0.5387336 | 0.5812397 | 0.5301107 |
| Cep162      | 0.3132594 | 0.3917914 | 0.4303367 | 0.6158859 | 0.6238326 | 0.6816408 |
| Pdelc       | 0.5143135 | 0.527525  | 0.5107971 | 0.7395712 | 0.7524552 | 0.8437437 |

|            |           |           |           |           |           |           |
|------------|-----------|-----------|-----------|-----------|-----------|-----------|
| Phykp1     | 0.8749608 | 0.8913607 | 0.8787414 | 0.2699734 | 0.2209941 | 0.5958892 |
| Mpp7       | 0.1926489 | 0.2897518 | 0.1712044 | 0.5107868 | 0.5350985 | 0.5819093 |
| Coll10a1   | 0.0028726 | 0.0032125 | 0.0014054 | 0.0333205 | 0.0274499 | 0.0568583 |
| Spint3     | 0.0185038 | 0         | 0         | 0.1518044 | 0.1258834 | 0.0999443 |
| Mir186     | 0.3033568 | 0.4307411 | 0.4734291 | 1.102409  | 1.0749443 | 1.2602347 |
| RGD1561034 | 0.3308132 | 0.2918504 | 0.2717071 | 0.6627555 | 0.7288136 | 0.7015462 |
| Cpz        | 0.8704075 | 0.8339697 | 0.8366793 | 0.5232524 | 0.5385388 | 0.5569043 |
| Syne3      | 0.3810723 | 0.4641528 | 0.5251896 | 0.7062091 | 0.7358564 | 0.7170543 |
| LOC499229  | 0.0857955 | 0.1590566 | 0.0887927 | 0.4149628 | 0.2360976 | 0.355466  |
| Samd5      | 0.1803872 | 0.2082003 | 0.3004678 | 0.5451119 | 0.6124719 | 0.5635009 |
| Trpv5      | 0.3207335 | 0.3569068 | 0.3276724 | 0.6053954 | 0.5787623 | 0.6016013 |
| Tet1       | 0.0107866 | 0.0135327 | 0.0092359 | 0.0833322 | 0.0607398 | 0.0768851 |
| LOC1009115 | 0.3560135 | 0.3749399 | 0.3873899 | 0.6842187 | 0.5990859 | 0.6102846 |
| Palm2      | 0.0693555 | 0.0625714 | 0.0741042 | 0.2649536 | 0.2499874 | 0.3419942 |
| Fam228b    | 0.1083782 | 0.1627179 | 0.2139982 | 0.4580296 | 0.5055337 | 0.4918897 |
| Cecr2      | 0.2870684 | 0.3511078 | 0.3374483 | 0.5524668 | 0.5155341 | 0.5379066 |
| Wee2       | 0.0057465 | 0.0127539 | 0.0014103 | 0.0820896 | 0.0570212 | 0.0638462 |
| Lrrc75b    | 0.8614231 | 0.8111109 | 0.8285796 | 1.1537398 | 1.1494726 | 1.290731  |
| LOC1025515 | 0.416493  | 0.528462  | 0.4495714 | 0.7513113 | 0.6935694 | 0.7663347 |
| Zfp385a    | 1.0146454 | 0.8866042 | 1.0155521 | 0.6863261 | 0.6991262 | 0.7208407 |
| Kcnj2      | 0.4973012 | 0.4741491 | 0.5137545 | 0.8118247 | 0.7107647 | 0.7167246 |
| Klh128     | 0.2622185 | 0.3216675 | 0.2671439 | 0.5505351 | 0.5100737 | 0.5398818 |
| Bloc1s3    | 1.2451143 | 1.0670319 | 1.2107925 | 0.8138667 | 0.9379331 | 0.9090373 |
| Adrala     | 0.6170109 | 0.5145201 | 0.5302509 | 0.899666  | 0.8416502 | 0.7920919 |
| Snta1      | 1.8707606 | 1.5441392 | 1.6813625 | 1.4161315 | 1.428735  | 1.3954355 |
| Faap20     | 1.2166931 | 1.114845  | 1.0896849 | 0.7995907 | 0.8725924 | 0.8894598 |
| Klkc2      | 0.0214601 | 0         | 0.0106137 | 0.010447  | 0.5368914 | 0.8327475 |
| LOC1003605 | 0.2706268 | 0.4193437 | 0.3105969 | 0.574734  | 0.5755234 | 0.5956651 |
| Seli       | 0.4938849 | 0.573186  | 0.5491718 | 0.8286221 | 0.8487393 | 0.833376  |
| Herc6      | 0.2824467 | 0.4176987 | 0.3621628 | 0.7084344 | 0.5733533 | 0.7044004 |
| Dnajb14    | 0.6276405 | 0.6783644 | 0.6349606 | 0.9752122 | 0.9829224 | 0.9595341 |
| RGD1561931 | 0.1341653 | 0.1199271 | 0.1391814 | 0.2523784 | 0.2796166 | 0.3393401 |
| LOC1025550 | 0.0557915 | 0.0464953 | 0.0704763 | 0.1993648 | 0.252947  | 0.2938041 |
| Fam126a    | 0.2445917 | 0.3189027 | 0.2599593 | 0.6430968 | 0.5822247 | 0.6605157 |
| Stk32a     | 0.427907  | 0.4018524 | 0.375439  | 0.7632168 | 0.7383403 | 0.8530665 |
| Kpna5      | 0.4247712 | 0.5409703 | 0.4619458 | 0.7680471 | 0.7232091 | 0.7868613 |
| Usp2       | 1.3846003 | 1.5751783 | 1.6514682 | 1.22343   | 1.3628452 | 1.1907461 |
| Zfp524     | 1.2904561 | 1.2785116 | 1.2938144 | 0.9626844 | 1.0658722 | 0.9508311 |
| Man2b2     | 1.5780151 | 1.6377666 | 1.3687206 | 1.2015434 | 1.3463521 | 1.1674766 |
| Sycp3      | 0.353902  | 0.3698466 | 0.3627469 | 0.7719684 | 0.8245319 | 0.7078423 |
| Tff3       | 2.7582472 | 2.3000529 | 2.2799027 | 1.8505033 | 1.702561  | 2.1827244 |
| LOC1009095 | 1.0424938 | 1.2847804 | 1.1447567 | 1.7202624 | 1.3607473 | 1.4494351 |
| Cdhr2      | 1.5672419 | 1.5128831 | 1.4858208 | 1.0779992 | 1.3700862 | 1.0234196 |
| RGD1310262 | 1.0624473 | 1.0245555 | 1.0412192 | 0.7642306 | 0.8082224 | 0.746191  |
| Bmt2       | 0.5935705 | 0.6137476 | 0.4740828 | 0.9830756 | 0.9279239 | 0.9401821 |
| RGD1566235 | 1.5249669 | 1.4067428 | 1.4002043 | 1.1531561 | 1.2079193 | 1.1109447 |
| Ralgps1    | 0.3304111 | 0.398914  | 0.4240408 | 0.6149092 | 0.7350154 | 0.7484683 |
| LOC1009115 | 0.0970529 | 0.0569322 | 0.0731509 | 0.1040787 | 0.4782245 | 0.6810402 |
| Sult4a1    | 1.0690048 | 1.2075714 | 1.1701309 | 0.4239594 | 0.8145724 | 0.8231099 |
| Itga4      | 0.0598693 | 0.1480488 | 0.0691603 | 0.3402829 | 0.2639675 | 0.311517  |
| Zscan30    | 0.4898166 | 0.6324863 | 0.570209  | 0.8069465 | 0.7973278 | 0.8532198 |

|            |           |           |           |           |           |           |
|------------|-----------|-----------|-----------|-----------|-----------|-----------|
| Ptgds      | 1.9348163 | 1.0385996 | 1.6721515 | 1.0570377 | 0.9714685 | 1.1152226 |
| Cfap97     | 0.5363252 | 0.6034439 | 0.5117274 | 0.8339507 | 0.8513221 | 0.8510838 |
| Agbl3      | 0.3065609 | 0.3504982 | 0.345843  | 0.5540427 | 0.5114283 | 0.5776707 |
| LOC1025502 | 0.0017122 | 0         | 0.0033388 | 0.0378796 | 0.0384101 | 0.0252151 |
| LOC1025530 | 0.1890893 | 0.2321627 | 0.196504  | 0.4971994 | 0.4035509 | 0.5147999 |
| Fam149a    | 1.3840474 | 1.4378134 | 1.1130093 | 1.6573955 | 1.5644855 | 1.7212485 |
| Nkap       | 0.729801  | 0.8923572 | 0.760438  | 1.1356283 | 1.139132  | 1.1398109 |
| Tpm2       | 1.3911638 | 1.5547831 | 1.2988882 | 1.1645553 | 1.0384294 | 1.2172489 |
| Mfap3      | 0.5721748 | 0.5646931 | 0.5253904 | 0.8277304 | 0.8774896 | 0.9082003 |
| Micu3      | 0.4171006 | 0.4575594 | 0.466691  | 0.7393332 | 0.6781112 | 0.6847041 |
| Akap17b    | 0.3245526 | 0.3811925 | 0.3407875 | 0.5952507 | 0.5243991 | 0.6560615 |
| Elmod2     | 0.2669871 | 0.2199405 | 0.2223436 | 0.5058703 | 0.514905  | 0.52142   |
| Card6      | 0.4134923 | 0.4886195 | 0.4405665 | 0.7175663 | 0.6139506 | 0.7051951 |
| Tab3       | 0.304971  | 0.3550778 | 0.3512526 | 0.5420152 | 0.5157866 | 0.5424445 |
| Zfp758     | 0.3631001 | 0.4950233 | 0.4359727 | 0.686366  | 0.6611203 | 0.7420695 |
| Sorcs1     | 0.3965811 | 0.4256926 | 0.4237707 | 0.6303206 | 0.5862354 | 0.7304603 |
| Slc26a2    | 0.1690284 | 0.1724763 | 0.1232214 | 0.3701859 | 0.3254427 | 0.4613374 |
| Duox2      | 0.0332581 | 0.6383494 | 0.0284093 | 0.0142111 | 0.0138481 | 0.0032366 |
| LOC1009107 | 0.1166723 | 0.1810377 | 0.140229  | 0.394128  | 0.4773508 | 0.2588977 |
| Tmem170b   | 0.2516819 | 0.1658493 | 0.313914  | 0.717493  | 0.6493065 | 0.6278763 |
| Pik3ap1    | 0.84557   | 1.0642022 | 0.9929016 | 1.2152946 | 1.125978  | 1.4331326 |
| Fam129a    | 0.387596  | 0.5401524 | 0.3655096 | 0.8202277 | 0.6411075 | 0.7797562 |
| Lcn2       | 0.7013903 | 1.7076829 | 1.2083123 | 0.7583375 | 0.5895942 | 0.6060447 |
| Slc4a8     | 0.125624  | 0.0856689 | 0.0915526 | 0.2535932 | 0.2920839 | 0.3986653 |
| Dbp        | 2.0543654 | 1.8884634 | 2.1515917 | 1.4392897 | 1.6886867 | 1.8589878 |
| Ammecr1    | 0.0691417 | 0.103905  | 0.0651434 | 0.2607488 | 0.2769158 | 0.3058287 |
| Melk       | 0.7610136 | 0.6445201 | 0.7948687 | 0.4544365 | 0.460971  | 0.4037685 |
| Ss1811     | 0.8152522 | 0.8410979 | 0.9008235 | 1.1442586 | 1.1711622 | 1.1398017 |
| B3galt2    | 0.2513784 | 0.1964428 | 0.1661663 | 0.5969776 | 0.3826169 | 0.4623887 |
| Ubxn7      | 0.1093247 | 0.1703654 | 0.1017729 | 0.3744142 | 0.3986181 | 0.3693529 |
| LOC1025485 | 0.0075876 | 0.0063753 | 0.0236438 | 0.0849375 | 0.0931709 | 0.0910909 |
| Nrtn       | 1.2608535 | 1.0735657 | 1.2064917 | 0.7081513 | 0.9184975 | 0.8264421 |
| Wasf3      | 0.4952536 | 0.52989   | 0.4822493 | 0.7734773 | 0.7460566 | 0.7611502 |
| Zfp507     | 0.4357757 | 0.4672663 | 0.475595  | 0.6715684 | 0.7249196 | 0.7591846 |
| Pdk4       | 0.6891938 | 0.9426295 | 0.7259018 | 1.1498377 | 1.3962491 | 1.0324011 |
| Gcnt6      | 0.5698198 | 0.5627284 | 0.6230843 | 0.8380748 | 0.7849633 | 0.9179191 |
| Naaladl2   | 0.1046434 | 0.1400219 | 0.109094  | 0.3168916 | 0.2065328 | 0.3223427 |
| Capg       | 1.3389908 | 1.7509266 | 1.4669822 | 1.138382  | 1.2050504 | 1.3102235 |
| Alkbh2     | 1.2226342 | 1.1539535 | 1.1873188 | 0.8943788 | 0.9041869 | 0.8886803 |
| Csgalnact2 | 0.472864  | 0.4778405 | 0.4485133 | 0.7478938 | 0.7210023 | 0.7268704 |
| Mrgbp      | 0.1227326 | 0.4673606 | 0.442136  | 0.0432223 | 0.047146  | 0.0969226 |
| Mbd5       | 0.3475826 | 0.3640652 | 0.3741351 | 0.5733554 | 0.5579676 | 0.575041  |
| Cacng5     | 1.7509079 | 1.1611982 | 1.450717  | 0.8874925 | 0.7789223 | 1.2263922 |
| Pou2f1     | 0.326652  | 0.3300062 | 0.328278  | 0.5286218 | 0.5306266 | 0.648246  |
| LOC1009096 | 0.0128661 | 0.0103117 | 0.028219  | 0.1359265 | 0.0647877 | 0.1297613 |
| Tgfbli1    | 0.881174  | 0.8861351 | 0.921971  | 0.5877821 | 0.6561338 | 0.5848572 |
| Ctdsp12    | 0.3267183 | 0.4116974 | 0.5307927 | 0.8128231 | 0.8298161 | 0.7716112 |
| Glcci1     | 0.5868805 | 0.6366273 | 0.5852528 | 0.9110386 | 0.8512121 | 0.876977  |
| Kbtbd3     | 0.3713637 | 0.4784621 | 0.4918454 | 0.7102209 | 0.6590305 | 0.7088756 |
| Adgrg6     | 0.4279294 | 0.5919853 | 0.4299856 | 0.7611145 | 0.712184  | 0.7456406 |
| Setd7      | 0.2228481 | 0.2838159 | 0.3322073 | 0.6719314 | 0.5641504 | 0.6052675 |

|            |           |           |           |           |           |           |
|------------|-----------|-----------|-----------|-----------|-----------|-----------|
| Mbps2      | 0.5254717 | 0.6441906 | 0.600791  | 0.8855366 | 0.8238685 | 0.8361748 |
| Hydin      | 0.0656985 | 0.0688798 | 0.0728061 | 0.1742344 | 0.145058  | 0.2184705 |
| Reep6      | 1.3789557 | 1.4901709 | 1.4382902 | 1.0646555 | 1.3095831 | 1.0296125 |
| Myo1b      | 0.1906796 | 0.3097729 | 0.2079514 | 0.5700434 | 0.4759613 | 0.6008048 |
| Nsun3      | 0.1118209 | 0.0956566 | 0.1766669 | 0.4303567 | 0.4088949 | 0.4689624 |
| LOC681177  | 0.1284078 | 0.2557117 | 0.2328522 | 0.5872743 | 0.5458445 | 0.4578204 |
| LOC1083492 | 0.0144074 | 0.0160868 | 0         | 0.1084687 | 0.0839274 | 0.1232409 |
| Rs11       | 0.2176634 | 0.2872077 | 0.3322945 | 0.5934848 | 0.528736  | 0.6538806 |
| Zfhx3      | 0.1396264 | 0.1890949 | 0.1422518 | 0.2956437 | 0.2444203 | 0.3178204 |
| LOC1009104 | 0.0208439 | 0.0101187 | 0.04791   | 0.0968441 | 0.1585493 | 0.3423216 |
| Grm3       | 0         | 0         | 0         | 0.0194486 | 0.008082  | 0.0093164 |
| Opcml      | 0.112491  | 0.0812786 | 0.0947777 | 0.254256  | 0.2726699 | 0.2693494 |
| Sptlc3     | 0.0066028 | 0         | 0         | 0.1266864 | 0.0122839 | 0.1427437 |
| Map9       | 0.3298753 | 0.4549592 | 0.3835197 | 0.6635455 | 0.5901438 | 0.659126  |
| Six4       | 0.1727013 | 0.204784  | 0.1374999 | 0.3140855 | 0.3902805 | 0.4404436 |
| Sgip1      | 0.193922  | 0.194322  | 0.150595  | 0.4256706 | 0.3048293 | 0.3588194 |
| LOC1036900 | 0         | 0.0012022 | 0         | 0.0395241 | 0.0282797 | 0.0034756 |
| LOC1025556 | 0.3355678 | 0.4588226 | 0.3977742 | 0.7087962 | 0.6093677 | 0.7118425 |
| Abra       | 0         | 0         | 0         | 0.0775619 | 0.0395052 | 0.1116492 |
| LOC499407  | 0.0525597 | 0.0676657 | 0.0650462 | 0.1994846 | 0.2000543 | 0.190963  |
| RT1-Bb     | 1.6627275 | 1.6104529 | 1.2694683 | 1.1996565 | 1.224122  | 1.2812331 |
| LOC1009101 | 0.105236  | 0.1568357 | 0.0688886 | 0.3109999 | 0.3141702 | 0.3324599 |
| Duoxa2     | 0.0375316 | 0.8985722 | 0.0539444 | 0.0093201 | 0.0179754 | 0         |
| Hoxc6      | 0.2008621 | 0.2824357 | 0.2033377 | 0.3661913 | 0.4281031 | 0.3956186 |
| LOC1003606 | 1.418749  | 1.439159  | 1.4678645 | 1.0038503 | 1.2177904 | 1.0243147 |
| Map3k1     | 0.2246326 | 0.2709285 | 0.247612  | 0.4192725 | 0.5629122 | 0.4638961 |
| Eya4       | 0.0833581 | 0.12173   | 0.0507716 | 0.2665879 | 0.290257  | 0.3372704 |
| Zfp770     | 0.3982865 | 0.5025445 | 0.4376216 | 0.6418288 | 0.6877828 | 0.705942  |
| Acta2      | 1.5824143 | 1.6943032 | 1.4282507 | 1.3217246 | 1.1340768 | 1.4108032 |
| Ren        | 1.1874032 | 1.028299  | 1.4020207 | 0.9026826 | 0.9386218 | 0.8165643 |
| Spred2     | 0.8482779 | 0.9272193 | 0.8317147 | 1.1489992 | 1.212376  | 1.1456376 |
| Phf6       | 0.0791683 | 0.0649359 | 0.0741731 | 0.1801489 | 0.2898623 | 0.2452652 |
| LOC1025504 | 0         | 0.0196665 | 0.0069703 | 0.0873933 | 0.0908329 | 0.0877059 |
| LOC1025564 | 0.1643091 | 0.1802559 | 0.1137624 | 0.4258888 | 0.4095499 | 0.452592  |
| LOC686967  | 0.214438  | 0.2117128 | 0.3293187 | 0.6347541 | 0.5832703 | 0.4642443 |
| LOC1025514 | 0.1540359 | 0.2351907 | 0.1963961 | 0.337772  | 0.4170189 | 0.5004036 |
| LOC1083481 | 1.7205961 | 0.6399807 | 0.5094744 | 0.3355604 | 0.4938347 | 0.3956664 |
| RT1-Db1    | 1.7642673 | 1.7005021 | 1.3265208 | 1.2427472 | 1.2491549 | 1.3964334 |
| Tbc1d24    | 0.291394  | 0.3755238 | 0.3638421 | 0.5450248 | 0.652442  | 0.6354188 |
| Odf21      | 0.3138321 | 0.3922165 | 0.32753   | 0.5606396 | 0.5763787 | 0.5902324 |
| Mcc        | 0.1398341 | 0.142873  | 0.0710691 | 0.3382823 | 0.3921951 | 0.3486447 |
| Apob       | 0.125987  | 0.1232493 | 0.0738969 | 0.4317191 | 0.1981664 | 0.2233632 |
| Dnajc6     | 0.3705451 | 0.3372912 | 0.3697177 | 0.5930127 | 0.6028005 | 0.5421715 |
| Inpp4b     | 0.2185249 | 0.2620507 | 0.2335587 | 0.4537092 | 0.3953366 | 0.4987328 |
| Mrap       | 1.312759  | 1.1655028 | 1.1151244 | 0.7833647 | 0.8458255 | 0.9422386 |
| Ccdc92     | 0.8305243 | 0.8400592 | 0.809601  | 0.4721821 | 0.5627698 | 0.5865305 |
| LOC1083482 | 0.1171373 | 0.1742753 | 0.1295146 | 0.3380115 | 0.3525787 | 0.4056927 |
| RGD1563986 | 0.3991723 | 0.4918583 | 0.4592029 | 0.74238   | 0.7915257 | 0.8134202 |
| Slit1      | 0.1792951 | 0.1587796 | 0.2650176 | 0.0272056 | 0.0720702 | 0.0571086 |
| Wispl      | 0.2771267 | 0.3359714 | 0.2072744 | 0.6173635 | 0.5423801 | 0.6455972 |
| Xkr4       | 0.0681527 | 0.0275724 | 0.0425818 | 0.207877  | 0.1563645 | 0.2263299 |

|            |           |           |           |           |           |           |
|------------|-----------|-----------|-----------|-----------|-----------|-----------|
| LOC1009125 | 0.380914  | 0.2569826 | 0.2905488 | 1.1252386 | 0.2471858 | 0.9536455 |
| Zfp169     | 0.2028881 | 0.1800323 | 0.1913464 | 0.4720989 | 0.3748174 | 0.4904844 |
| Nudt22     | 1.3385727 | 1.2095991 | 1.2579213 | 0.9544371 | 1.052293  | 0.9782283 |
| Gucyl1a2   | 0.0406598 | 0.0763299 | 0.0673576 | 0.2903266 | 0.241255  | 0.1822943 |
| Tmem253    | 0.179805  | 0.2414935 | 0.1921915 | 0.6054316 | 0.5537616 | 0.4545229 |
| Gk5        | 0.0309023 | 0.0453251 | 0.0515636 | 0.1698277 | 0.1523092 | 0.1813099 |
| Cenpf      | 0.0037342 | 0.0429112 | 0.0196949 | 0.1352107 | 0.1328319 | 0.1135035 |
| Dxo        | 1.2324712 | 1.0964831 | 1.1408065 | 0.8562873 | 0.935368  | 0.8763202 |
| Akr1c1     | 1.7586276 | 1.7976808 | 1.5835343 | 2.0422661 | 2.2025132 | 1.8393836 |
| Hgf        | 0.3039756 | 0.400893  | 0.3406025 | 0.6464056 | 0.5417919 | 0.6749485 |
| Ppp1r15a   | 1.397686  | 1.121705  | 1.1055647 | 0.9208942 | 0.9604145 | 0.9649182 |
| LOC1025546 | 0         | 0         | 0         | 0         | 0.1219113 | 0.0800429 |
| Zfp551     | 0.1013412 | 0.0879189 | 0.1061879 | 0.2433553 | 0.2787893 | 0.3771255 |
| Mdfi       | 0.7611923 | 0.7719766 | 0.6637477 | 0.3888213 | 0.4515399 | 0.3966427 |
| LOC1036905 | 0.0225455 | 0.0085449 | 0.0074701 | 0.0960639 | 0.0790241 | 0.1226632 |
| Polr21     | 0.4894206 | 0.361085  | 1.3356773 | 0.2767575 | 0.1223989 | 0.0512579 |
| Muc6       | 0.0097826 | 0.0059957 | 0.0086979 | 0.0404241 | 0.0470447 | 0.0407979 |
| LOC1003610 | 0.4092178 | 1.96395   | 0.1920558 | 0.2492903 | 0.1728052 | 0.3679929 |
| Klf2       | 1.5846982 | 1.3078264 | 1.3638272 | 1.1791034 | 1.1695831 | 1.0747021 |
| LOC1009115 | 0.018041  | 0.0135259 | 0         | 0.0950438 | 0.2665274 | 0.0731265 |
| LOC1083504 | 0.0251697 | 0.0057597 | 0.0340657 | 0.1247235 | 0.1570868 | 0.1579277 |
| Nfx11      | 0.4683713 | 0.5490006 | 0.4868519 | 0.7368489 | 0.7261956 | 0.7517984 |
| Slc26a7    | 0.3555964 | 0.423168  | 0.5389204 | 0.6270105 | 0.75199   | 0.7168538 |
| Rnf125     | 0.5910657 | 0.6212084 | 0.6238157 | 1.0204403 | 0.9090199 | 0.9147543 |
| Epm2a      | 0.1517587 | 0.0354612 | 0.2681752 | 0.4890399 | 0.6345908 | 0.6425395 |
| Pak2       | 0.1241127 | 0.0941123 | 0.323477  | 0.4050101 | 0.5559447 | 0.8808731 |
| Map1b      | 0.2509061 | 0.292454  | 0.2692019 | 0.5195595 | 0.3750804 | 0.4224194 |
| Nt5dc3     | 0.4524727 | 0.3786926 | 0.4911888 | 0.6220782 | 0.7110686 | 0.8092948 |
| Plagl1     | 0.0543376 | 0.1039649 | 0.0657642 | 0.1710489 | 0.2250811 | 0.2820831 |
| LOC1083481 | 0.0475887 | 0.0478978 | 0.0588703 | 0.1853975 | 0.1305265 | 0.1397819 |
| Igf1       | 0.8158319 | 0.7119472 | 0.6187205 | 0.9369731 | 0.8717866 | 1.1519998 |
| Mk12       | 0.0786354 | 0.1460379 | 0.1795137 | 0.3837442 | 0.3647111 | 0.395269  |
| Igfbp4     | 1.6864677 | 1.6001178 | 1.7255025 | 1.5657455 | 1.2444349 | 1.2756241 |
| LOC1003635 | 0.1731237 | 0.3092471 | 0.3315697 | 0.6203277 | 0.572818  | 0.646127  |
| Zscan4f    | 0.0054275 | 0.0407933 | 0.0503184 | 0.1886469 | 0.1462379 | 0.2654702 |
| Adra1b     | 0.9287769 | 0.8444861 | 1.0257144 | 0.6440708 | 0.6942165 | 0.7357406 |
| Med12l     | 0.0275216 | 0.0818408 | 0.0781084 | 0.2802701 | 0.2354692 | 0.1914296 |
| Dsg2       | 0.3470942 | 0.3088933 | 0.3008816 | 0.509249  | 0.4888459 | 0.621576  |
| Usp26      | 0.1311034 | 0.1129044 | 0.1352821 | 0.3063418 | 0.2806701 | 0.353253  |
| Rpl7a      | 1.2559205 | 1.8409138 | 1.2873555 | 1.0892108 | 1.1363149 | 1.0565351 |
| Kdm4c      | 0.4100212 | 0.5388972 | 0.419952  | 0.6883408 | 0.6460238 | 0.7923045 |
| Rel        | 0.1748892 | 0.2085396 | 0.146061  | 0.4437313 | 0.3735322 | 0.4529483 |
| Ghr1       | 0.0361992 | 0.0945103 | 0.0520634 | 0.4898115 | 0.3697592 | 0.2434445 |
| Tp53i13    | 1.1106249 | 1.0465949 | 1.0381834 | 0.7322166 | 0.8463548 | 0.7909095 |
| Ptchd1     | 0         | 0         | 0.0068359 | 0.0571001 | 0.064337  | 0.0294732 |
| Slc40a1    | 0.5203102 | 0.539769  | 0.4887224 | 0.7686731 | 0.7560988 | 0.7707605 |
| Zfp398     | 0.1910268 | 0.2686484 | 0.2410594 | 0.4416587 | 0.5056849 | 0.4712133 |
| Dnal1      | 0.3771339 | 0.4024462 | 0.3243631 | 0.7543918 | 0.7148798 | 0.6838984 |
| Lepr       | 0.2730461 | 0.3422073 | 0.3374102 | 0.6267084 | 0.4498378 | 0.662504  |
| Nhp2       | 0.295634  | 0.189084  | 0.2187902 | 1.1728158 | 0.1090307 | 1.1288075 |
| LOC1025546 | 0.3188618 | 0.3282709 | 0.3325477 | 0.5594349 | 0.4951217 | 0.6073577 |

|            |           |           |           |           |           |           |
|------------|-----------|-----------|-----------|-----------|-----------|-----------|
| Ctsz       | 1.1871189 | 1.4485859 | 1.1278458 | 0.9886139 | 0.9118439 | 1.045566  |
| Zbtb37     | 0.194563  | 0.1956377 | 0.1831172 | 0.4273477 | 0.4187741 | 0.488131  |
| Zfp655     | 0.2918188 | 0.250162  | 0.3273621 | 0.5211305 | 0.5323452 | 0.5211397 |
| Myo3b      | 0.3309289 | 0.3527154 | 0.3541862 | 0.5450666 | 0.5629897 | 0.6352613 |
| Gipc3      | 0.6502947 | 0.6740614 | 0.7949515 | 0.3361886 | 0.5154279 | 0.3592049 |
| Ptp4a3     | 0.9000527 | 0.9665332 | 0.8646283 | 0.6422165 | 0.6719638 | 0.6408105 |
| Tmed6      | 1.5597982 | 1.3067232 | 1.5245884 | 1.1179109 | 1.2311932 | 1.2503468 |
| LOC103690C | 0.00575   | 0         | 0.0083992 | 0.2012168 | 0.0945918 | 0.0092846 |
| Slf1       | 0.4372013 | 0.4987651 | 0.4795083 | 0.6875049 | 0.679489  | 0.7497594 |
| RT1-M6-2   | 0.3444719 | 0.1680164 | 0.4094729 | 0.5905423 | 0.6600435 | 0.9004923 |
| LOC102548C | 0.0018235 | 0.0030557 | 0.0017813 | 0.0201642 | 0.0118147 | 0.0126522 |
| Fsd11      | 0.1412976 | 0.2416772 | 0.2090563 | 0.3578346 | 0.4066955 | 0.4044539 |
| Ston1      | 0.4466197 | 0.5103735 | 0.4281224 | 0.7249472 | 0.7211707 | 0.6788023 |
| Adam11     | 0.1389737 | 0.0873883 | 0.1556197 | 0.3928047 | 0.235416  | 0.5019611 |
| Grik2      | 0.193513  | 0.2323743 | 0.4446623 | 0.6229349 | 0.7246877 | 0.5622891 |
| Ptgfr      | 0.2719177 | 0.3487517 | 0.4532818 | 0.5619526 | 0.7261459 | 0.6593897 |
| LOC688981  | 0         | 0         | 0         | 0.0403898 | 0.0135301 | 0.0487222 |
| Anln       | 0.0324553 | 0.056093  | 0.0170862 | 0.156663  | 0.1413366 | 0.1444762 |
| RGD156045E | 0.0127267 | 0.0279762 | 0.0154898 | 0.1461932 | 0.0670959 | 0.1210451 |
| Gja4       | 0.9288912 | 0.986089  | 0.8463983 | 0.6749726 | 0.6218492 | 0.6313987 |
| Scgn       | 0.0533674 | 0.0125231 | 0.0422508 | 0.1695624 | 0.2074018 | 0.3617689 |
| Pnpla5     | 0.0291259 | 0.0869705 | 0.0164975 | 0         | 0         | 0         |
| Ppp1r14a   | 1.1162409 | 1.0861437 | 1.1594109 | 0.7628807 | 0.8132734 | 0.7517185 |
| Trpc1      | 0.2749845 | 0.3359729 | 0.3425845 | 0.5529996 | 0.5462893 | 0.5848274 |
| LOC690044  | 0.0472666 | 2.3913491 | 0         | 0.0867346 | 0.1035115 | 0         |
| Klhl15     | 0.0680653 | 0.1441705 | 0.0711516 | 0.2787762 | 0.2868113 | 0.3021794 |
| Myh1       | 0.0123358 | 0.0205057 | 0.0075726 | 0         | 0         | 0         |
| Pex11g     | 1.0609594 | 1.0294689 | 1.012925  | 0.7092864 | 0.805328  | 0.7548776 |
| RT1-A1     | 1.2633371 | 1.0837082 | 1.4605333 | 0.9789761 | 1.0456517 | 1.0000212 |
| LOC102553C | 0.1083024 | 0.1099319 | 0.100332  | 0.3367659 | 0.2860494 | 0.2850336 |
| Wdr44      | 0.2016446 | 0.3541762 | 0.2496372 | 0.4886905 | 0.5027154 | 0.5797314 |
| Wnk3       | 0.0037009 | 0.0163215 | 0.0116417 | 0.0669182 | 0.0546975 | 0.0429948 |
| Cd16311    | 0.0660575 | 0.3991622 | 0.1534006 | 0.031732  | 0.0527745 | 0.0151558 |
| Zygl1a     | 0.0276156 | 0.0207611 | 0.0114524 | 0.0995773 | 0.0882776 | 0.1065097 |
| Rasef      | 0.0820031 | 0.1283    | 0.1718553 | 0.3387114 | 0.2837964 | 0.5242646 |
| LOC102551E | 0.044655  | 0.0337325 | 0.0705195 | 0.1719613 | 0.2286297 | 0.3083448 |
| Adam411    | 0.0260165 | 0.0746207 | 0.0877765 | 0.3465128 | 0.2413495 | 0.1803463 |
| LOC108351E | 0.0809208 | 0.0730978 | 0.0414057 | 0.2815414 | 0.1700972 | 0.2400354 |
| Nek1       | 0.1930441 | 0.294261  | 0.2652401 | 0.5067666 | 0.4434243 | 0.4611641 |
| Baat       | 1.0178921 | 1.2913116 | 1.2754734 | 1.375881  | 1.4084904 | 1.7026609 |
| Dnhd1      | 0.1539337 | 0.1777535 | 0.1878744 | 0.3082683 | 0.2819858 | 0.3252514 |
| LOC102554E | 0.5025206 | 0.6407817 | 0.5730291 | 0.8156693 | 0.8167293 | 0.8963329 |
| Mcpt2      | 0         | 0.0274934 | 0         | 0.3601308 | 0         | 0.6656417 |
| Trpc5      | 0.0442029 | 0.0708458 | 0.0503245 | 0.2004699 | 0.1285852 | 0.2317022 |
| Ier51      | 1.2557959 | 1.0286416 | 1.0361024 | 0.6341382 | 0.7392672 | 0.9483518 |
| Syt15      | 0.0633074 | 0.0570767 | 0.0502378 | 0.1967967 | 0.1370443 | 0.2035565 |
| Fam131c    | 1.1615058 | 1.0476917 | 1.2392968 | 0.6709214 | 0.9731358 | 0.8219459 |
| Clqtnf5    | 1.0314754 | 0.9056582 | 0.8945981 | 0.7193568 | 0.5755016 | 0.6493659 |
| Ttll10     | 0.546242  | 0.6229485 | 0.7412505 | 0.8683748 | 0.975045  | 0.8824289 |
| Adora2a    | 0.6320877 | 0.6420185 | 0.6398798 | 0.4115439 | 0.353433  | 0.453729  |
| Zfp780b    | 0.2534098 | 0.3758203 | 0.2995925 | 0.4965251 | 0.5189168 | 0.5597621 |



|            |           |           |           |           |           |           |
|------------|-----------|-----------|-----------|-----------|-----------|-----------|
| Ptp4a1     | 0.4088324 | 0.4058504 | 0.3986504 | 0.6156722 | 0.668374  | 0.6879705 |
| Mdk        | 1.4669642 | 1.4102949 | 1.2564399 | 0.9457032 | 1.0703094 | 1.2266746 |
| Glycam1    | 0.1603266 | 0.5060077 | 0.5878747 | 0.0580763 | 0.1298234 | 0.0795799 |
| Mphosph9   | 0.3376749 | 0.3418673 | 0.3730905 | 0.6113059 | 0.5823415 | 0.534301  |
| Xylt1      | 0.2152841 | 0.2100877 | 0.1913551 | 0.4880735 | 0.3414233 | 0.3715204 |
| Rhobtb3    | 0.153802  | 0.2123342 | 0.1704507 | 0.3905306 | 0.3550504 | 0.3762103 |
| Ccdc150    | 0.0281709 | 0.0413784 | 0.0203634 | 0.1240781 | 0.1044572 | 0.1201526 |
| Zbtb26     | 0.3164428 | 0.4588259 | 0.3697353 | 0.6097074 | 0.6360884 | 0.6223859 |
| Ppargc1b   | 0.482021  | 0.4355277 | 0.3991616 | 0.6465714 | 0.6913215 | 0.7261027 |
| Rab27b     | 0.0728428 | 0.0958169 | 0.0487985 | 0.2384041 | 0.1567281 | 0.3916287 |
| Fndc10     | 1.2991114 | 1.5066645 | 1.6133554 | 0.9505094 | 1.3545198 | 0.9692422 |
| Cd46       | 0.1059827 | 0.1327456 | 0.0582079 | 0.3126935 | 0.3085991 | 0.2863607 |
| Mvd        | 1.0365852 | 1.0014395 | 0.8954279 | 0.7133162 | 0.7671433 | 0.6539715 |
| Bicd1      | 0.0437102 | 0.0378731 | 0.0787843 | 0.2059615 | 0.1579164 | 0.1740646 |
| Mmp7       | 0         | 1.1885006 | 0.0089107 | 0         | 0.0169252 | 0         |
| Bend4      | 0.1338611 | 0.1548802 | 0.1270189 | 0.336917  | 0.2812645 | 0.330835  |
| Cep135     | 0.1646586 | 0.2137693 | 0.2292154 | 0.3688697 | 0.364735  | 0.4933501 |
| Etnk2      | 0.915668  | 0.9867287 | 1.0377962 | 0.4669491 | 0.7294567 | 0.6116335 |
| Ror1       | 0.0933809 | 0.1328427 | 0.0850391 | 0.2534109 | 0.2690755 | 0.3188321 |
| Tceanc     | 0.1716715 | 0.1202596 | 0.1430139 | 0.3698262 | 0.4285019 | 0.3834479 |
| Grem2      | 0.4569719 | 0.8439415 | 0.6530995 | 1.0899531 | 1.0684511 | 0.8213456 |
| Limd2      | 1.1348141 | 1.2110039 | 1.013855  | 0.9071543 | 0.7939232 | 0.8537868 |
| Cyp2c11    | 0.9244205 | 0.4808596 | 0.6475996 | 1.3706505 | 0.5188865 | 1.8147571 |
| Pde10a     | 0.1183249 | 0.0687826 | 0.0699678 | 0.2780722 | 0.2304975 | 0.2671104 |
| Qrich2     | 0.2827955 | 0.2203402 | 0.2684053 | 0.1068248 | 0.1225284 | 0.1350923 |
| LOC1025540 | 0.0226773 | 0.0445175 | 0.0321333 | 0.1424456 | 0.1041562 | 0.110488  |
| Emp3       | 1.0897833 | 1.1790107 | 1.0351888 | 0.7392983 | 0.7728204 | 0.8436443 |
| Rbfox2     | 0.3598611 | 0.3769237 | 0.3997547 | 0.6132968 | 0.6376157 | 0.6692409 |
| Cox4i2     | 0.619929  | 0.6403246 | 0.7133792 | 0.3440128 | 0.342666  | 0.2989595 |
| Cyp4f4     | 0.0508119 | 0.0779894 | 0.0377967 | 0.2613203 | 0.2016054 | 0.1737427 |
| Trim69     | 0.0342702 | 0.0501765 | 0.0370734 | 0.1605457 | 0.1192756 | 0.2124803 |
| Mgmt       | 1.4236462 | 1.3050993 | 1.2388109 | 1.0127829 | 1.0481972 | 1.1122486 |
| LOC1083481 | 0.2156188 | 0.2752418 | 0.2454883 | 0.4430684 | 0.4517961 | 0.5302723 |
| Cep126     | 0.2850821 | 0.3225742 | 0.3608629 | 0.5301716 | 0.5013373 | 0.555398  |
| Phka2      | 0.1988488 | 0.154815  | 0.2144885 | 0.3621987 | 0.3891544 | 0.4086121 |
| LOC1025528 | 0.258154  | 0.3421668 | 0.2748723 | 0.5122986 | 0.6031213 | 0.5357905 |
| Tmc4b      | 0.3695871 | 0.0782919 | 0.3324165 | 0.046558  | 0.0786032 | 0.0421    |
| Rassf9     | 0.6271963 | 0.678761  | 0.5539481 | 0.895304  | 0.8648969 | 0.9307919 |
| Zfp483     | 0.0196502 | 0         | 0.0223241 | 0.0924739 | 0.110227  | 0.0911284 |
| Cep295     | 0.2148695 | 0.2468361 | 0.2511509 | 0.4055041 | 0.386521  | 0.4305212 |
| RGD1566325 | 0.2011472 | 0.3208779 | 0.2563746 | 0.4218006 | 0.4744756 | 0.4284573 |
| Pgm211     | 0.1577378 | 0.2358792 | 0.1795463 | 0.4129247 | 0.3316695 | 0.3797937 |
| RGD1562521 | 0         | 0.0083589 | 0         | 0.0447509 | 0.0436459 | 0.0389696 |
| Adamts5    | 0.4071068 | 0.4655531 | 0.4399114 | 0.6521587 | 0.6786356 | 0.7111815 |
| Olfml2b    | 0.8697604 | 0.6952592 | 0.6279151 | 0.4440831 | 0.3540973 | 0.5654344 |
| Dhdh       | 0.352388  | 0.3826663 | 0.4484949 | 0.6768929 | 0.7154728 | 0.6725767 |
| LOC1036899 | 0         | 0.0203803 | 0.0178471 | 0.2614231 | 0.017122  | 0.3572791 |
| Pde6c      | 0.0208842 | 0.0232985 | 0.0051934 | 0.092291  | 0.0649974 | 0.1247635 |
| Ncapg      | 0.0411256 | 0.0892274 | 0.0381884 | 0.2464549 | 0.1801107 | 0.1619762 |
| RGD1562161 | 0.1023933 | 0.1503051 | 0.1318538 | 0.2810648 | 0.2974696 | 0.3792843 |
| LOC1025554 | 0.6949836 | 0.3745298 | 0.5550343 | 0.9452453 | 1.014146  | 0.7526239 |

|             |           |           |           |           |           |           |
|-------------|-----------|-----------|-----------|-----------|-----------|-----------|
| Cd36        | 0.6491945 | 0.9170808 | 0.7264782 | 1.0380872 | 0.9135265 | 1.1898728 |
| Fam50a      | 1.0672523 | 0.1972433 | 0.2614446 | 0.1835044 | 0.1174074 | 0.1607433 |
| Tbc1d32     | 0.2778115 | 0.3514643 | 0.2747844 | 0.5237722 | 0.4651444 | 0.5122116 |
| Syt12       | 0.2888476 | 0.1219871 | 0.1071518 | 0.4601521 | 0.4448297 | 0.3836721 |
| LOC10091010 | 0.2840796 | 0.0663445 | 0.0584681 | 0.4878129 | 0.4109141 | 0.5582787 |
| Nlrpla      | 0.2281754 | 0.2951849 | 0.2209578 | 0.4584292 | 0.3780169 | 0.4545255 |
| Filip1      | 0.1823341 | 0.2712349 | 0.2007072 | 0.4100549 | 0.3685829 | 0.4467678 |
| LOC1036900  | 0.4412194 | 0.0903243 | 0.0311534 | 0.8266289 | 0.7833015 | 0.7524648 |
| Afap1       | 0.2325231 | 0.2473501 | 0.2482121 | 0.5237424 | 0.4025023 | 0.5127355 |
| Tbkbp1      | 0.57279   | 0.6238273 | 0.5922739 | 0.3947807 | 0.4103051 | 0.353616  |
| Lanc13      | 0.0218578 | 0         | 0         | 0.0845817 | 0.0825825 | 0.1254019 |
| Kcnq3       | 0.0032433 | 0.0036268 | 0         | 0.0153719 | 0.0308818 | 0.0272757 |
| Wfdc10      | 0.6734541 | 0.5622095 | 0.9445504 | 0.1180829 | 0.362543  | 0.3433198 |
| Cabp1       | 1.0655915 | 0.8410919 | 0.8722029 | 0.5084759 | 0.5571807 | 0.7185018 |
| Sdf211      | 1.1589195 | 1.1682671 | 0.9665817 | 0.8179473 | 0.8082836 | 0.8398756 |
| Zfp64       | 0.7947122 | 0.8189361 | 0.8669374 | 0.5035653 | 0.6380841 | 0.6177193 |
| Neddl       | 0.3391276 | 0.4545043 | 0.4810849 | 0.6362354 | 0.6751297 | 0.694316  |
| LOC691254   | 0.0241517 | 0.0269322 | 0.056772  | 0.1326826 | 0.1493786 | 0.1804422 |
| LOC689268   | 0         | 0         | 0         | 0.5343938 | 0         | 0         |
| Skint10     | 0.2047827 | 0.184564  | 0.1893324 | 0.4984487 | 0.3892562 | 0.4748752 |
| Ccnd2       | 0.4921285 | 0.5029102 | 0.3902577 | 0.8281484 | 0.6665799 | 0.8540793 |
| Ten1        | 1.1017409 | 1.162112  | 1.0810835 | 0.7671719 | 0.8557848 | 0.8738809 |
| LOC1025537  | 0.2720167 | 0.2900214 | 0.2559987 | 0.4877599 | 0.4545985 | 0.5048849 |
| Hmcn1       | 0.0537463 | 0.1175016 | 0.0730476 | 0.1595079 | 0.1875429 | 0.2066496 |
| Rgn         | 1.872186  | 1.6678073 | 1.6464338 | 2.1378079 | 1.7504628 | 2.2663203 |
| Sycp2       | 0.0094167 | 0.0288403 | 0.0270369 | 0.0905325 | 0.0956181 | 0.089003  |
| Gpr4        | 0.7172831 | 0.735917  | 0.6256057 | 0.4954591 | 0.4310106 | 0.3585134 |
| Negr1       | 0.0302418 | 0.028259  | 0.0295638 | 0.1292446 | 0.1152312 | 0.1704633 |
| Rbl1        | 0.1781783 | 0.2338504 | 0.196817  | 0.4256573 | 0.3810139 | 0.4755802 |
| LOC1025502  | 0.4950949 | 0.4762246 | 0.5820869 | 0.7597628 | 0.8028468 | 0.8253724 |
| Slc8a2      | 0.0448106 | 0.0435131 | 0.0210015 | 0.1430361 | 0.1607063 | 0.1285983 |
| Mir196c     | 0         | 0.115241  | 0.1848829 | 0.6916816 | 0.7464916 | 0.5248984 |
| Fscn1       | 0.7356977 | 0.7691229 | 0.6355464 | 0.4737077 | 0.4762039 | 0.4735601 |
| Fign        | 0.10909   | 0.0720893 | 0.0666021 | 0.2075383 | 0.2000618 | 0.2754706 |
| Unc5c       | 0.0062931 | 0.0162396 | 0.0112061 | 0.0332258 | 0.059963  | 0.0596574 |
| Prox1       | 0.2428479 | 0.2417112 | 0.3515999 | 0.3700727 | 0.5044599 | 0.6120803 |
| Setdb2      | 0.4256354 | 0.5154733 | 0.4773778 | 0.6931267 | 0.6702902 | 0.7514175 |
| Mest        | 0.6275431 | 0.5204162 | 0.4188071 | 0.9089852 | 1.0604718 | 0.6847094 |
| Diras1      | 0.1054866 | 0.0901455 | 0.1033091 | 0.0187203 | 0.0270872 | 0.0053444 |
| Pafah1b3    | 1.2460606 | 1.2396864 | 1.2006727 | 0.8590502 | 1.0518099 | 0.9315721 |
| Hdx         | 0         | 0.0162414 | 0.0142143 | 0.0934601 | 0.0701889 | 0.0502717 |
| Mmrn1       | 0.2258192 | 0.3120991 | 0.2511962 | 0.4503301 | 0.4114724 | 0.5538797 |
| Dzank1      | 0.2452781 | 0.219676  | 0.2592169 | 0.4161223 | 0.491393  | 0.5483998 |
| Mmp9        | 0.3368779 | 0.3919936 | 0.1366519 | 0.0802465 | 0.0314012 | 0.126574  |
| Lpar4       | 0         | 0.002524  | 0         | 0.0253466 | 0.0206857 | 0.0144317 |
| LOC679739   | 0.1265293 | 0.5390134 | 0.2807032 | 1.6832722 | 0.1803046 | 0.820913  |
| Gareml      | 0.4817858 | 0.5376443 | 0.5331175 | 0.7449677 | 0.7918142 | 0.7807283 |
| LOC1025500  | 0.0065501 | 0.0145213 | 0.0063993 | 0.0963319 | 0.0631526 | 0.0840518 |
| Zfp949      | 0.3019921 | 0.417609  | 0.4023339 | 0.5961528 | 0.5952928 | 0.6632978 |
| Asb7        | 0.2892227 | 0.3533056 | 0.3245413 | 0.525266  | 0.5467434 | 0.5144001 |
| LOC1036910  | 0.0241793 | 0.0269628 | 0.0349848 | 0.0907439 | 0.1161958 | 0.0863722 |

|            |           |           |           |           |           |           |
|------------|-----------|-----------|-----------|-----------|-----------|-----------|
| Pcdh9      | 0.051389  | 0.0311647 | 0.0153967 | 0.0722952 | 0.3091573 | 0.1015956 |
| Golt1a     | 1.2003628 | 1.1094636 | 0.8819804 | 0.7190279 | 0.7808249 | 0.6546667 |
| Rem1       | 0.9778551 | 0.8434783 | 0.8484437 | 0.5574656 | 0.5565291 | 0.728043  |
| Ccbe1      | 0.2744884 | 0.3616192 | 0.3160125 | 0.5597881 | 0.5744493 | 0.5541444 |
| Paqr4      | 0.6403071 | 0.6853956 | 0.5615124 | 0.3733017 | 0.390453  | 0.3283528 |
| LOC1025507 | 0.3254905 | 0.2958506 | 0.3847799 | 0.5927827 | 0.5704541 | 0.7488122 |
| Map3k6     | 0.4271216 | 0.4957989 | 0.3993494 | 0.2705952 | 0.2622559 | 0.2178759 |
| Map2       | 0.1707833 | 0.2832781 | 0.2405106 | 0.427944  | 0.3708785 | 0.3961362 |
| Wdr62      | 0.0924742 | 0.1109261 | 0.0728969 | 0.0258848 | 0.02872   | 0.0229468 |
| Cadml      | 0.3917    | 0.4733266 | 0.4351248 | 0.6351995 | 0.6105926 | 0.7173726 |
| Izumolr    | 0.0496304 | 0.1618056 | 0.0167905 | 0         | 0         | 0         |
| Csnk1g1    | 0.1755309 | 0.229006  | 0.2967778 | 0.4455888 | 0.4835567 | 0.5055707 |
| Fam206a    | 0.3331807 | 0.4334921 | 0.4675656 | 0.5954251 | 0.648922  | 0.6492937 |
| Cldn1      | 0.6419421 | 0.9346693 | 0.84997   | 1.1892094 | 1.2039524 | 0.8851158 |
| Ufsp1      | 1.091897  | 0.9818109 | 1.0862817 | 0.7815002 | 0.8272405 | 0.787739  |
| Caps2      | 0.0353623 | 0.0840519 | 0.0535399 | 0.1729764 | 0.186435  | 0.2071729 |
| RGD1561166 | 0.5404385 | 1.9608022 | 0.1922821 | 0.4696569 | 0.3028658 | 0.5131972 |
| Plk3       | 0.9003427 | 0.6581578 | 0.7102584 | 0.5559385 | 0.4571626 | 0.4736675 |
| Samd12     | 0.0440123 | 0.0127654 | 0.0630601 | 0.1942061 | 0.2365419 | 0.2055374 |
| Pag1       | 0.1744301 | 0.2366807 | 0.2128925 | 0.5155254 | 0.511908  | 0.412349  |
| LOC500375  | 0.5113406 | 1.8429549 | 0.2180695 | 0.3358616 | 0.3060075 | 0.5265968 |
| LOC1009125 | 0.1515268 | 0.1562184 | 0.1576592 | 0.8906405 | 0.0827018 | 0.5271763 |
| LOC500175  | 0.8941342 | 2.1316014 | 0.3166569 | 0.8368207 | 0.3955093 | 0.5109876 |
| Twf2       | 0.8495111 | 0.9262302 | 0.8572742 | 0.6388831 | 0.5337751 | 0.6799824 |
| Zfp366     | 0.1774156 | 0.1459991 | 0.1491602 | 0.3832729 | 0.2959541 | 0.3627216 |
| Cox11      | 0.4541581 | 0.5033532 | 0.4425885 | 0.6774261 | 0.7378484 | 0.7654882 |
| Cdon       | 0.2770244 | 0.2336684 | 0.2554902 | 0.43438   | 0.4310149 | 0.4153148 |
| Rps6ka5    | 0.288087  | 0.3002624 | 0.3241613 | 0.4440046 | 0.4791407 | 0.5484036 |
| RGD1560289 | 0.1605967 | 0.1867558 | 0.1979383 | 0.3248463 | 0.3136311 | 0.3111386 |
| Mef2b      | 0.3529494 | 0.3807297 | 0.4393086 | 0.0489145 | 0.195267  | 0.1467954 |
| Strip2     | 0.2908323 | 0.2507431 | 0.2074278 | 0.4747911 | 0.4052804 | 0.473389  |
| Giot1      | 0.2313191 | 0.3016401 | 0.2688936 | 0.4528647 | 0.4736144 | 0.5308777 |
| Mis18bp1   | 0.0390708 | 0.0773049 | 0.0733161 | 0.2106873 | 0.1409523 | 0.2191337 |
| Mrp153     | 0.3818037 | 0.3466407 | 0.4911679 | 0.3591811 | 0.365323  | 1.7917661 |
| Klf7       | 0.2086097 | 0.2561285 | 0.211868  | 0.4704281 | 0.4105212 | 0.4440105 |
| Kbtbd8     | 0.252409  | 0.2444724 | 0.3022382 | 0.5142556 | 0.4267992 | 0.4836974 |
| Pkhd111    | 0.0100641 | 0.0175404 | 0.0070465 | 0.0381252 | 0.0302459 | 0.0872962 |
| LOC1036899 | 0.0055982 | 0.0124273 | 0.0108703 | 0.422626  | 0.0129929 | 0.0090405 |
| Hlfx       | 0.8657957 | 0.6690707 | 0.6636667 | 0.2889995 | 0.4751984 | 0.5866313 |
| Npm3       | 1.0669943 | 1.0569247 | 1.156139  | 0.8215215 | 0.8548298 | 0.8146973 |
| Olr338     | 0         | 0         | 0         | 0.0544137 | 0.0851808 | 0.0414157 |
| LOC1083481 | 0.0034429 | 0.0127024 | 0.0111114 | 0.0361138 | 0.065935  | 0.0346931 |
| Cebpd      | 1.4158202 | 1.2576024 | 1.2210499 | 1.0561644 | 1.1194397 | 0.7936103 |
| LOC1025521 | 0.0899814 | 0.0600503 | 0.0880924 | 0.2449672 | 0.2079076 | 0.2170848 |
| Kcns1      | 0.012118  | 0.0755219 | 0.0059607 | 0         | 0         | 0         |
| Ido1       | 0         | 0.5976353 | 0         | 0         | 0         | 0         |
| Tmprss9    | 0.5284696 | 0.2589042 | 0.4793888 | 0.1796573 | 0.2621499 | 0.1178821 |
| Map3k7     | 0.2026787 | 0.2548796 | 0.2938127 | 0.1280769 | 0.107784  | 0.1071447 |
| Nrxn1      | 0.0793264 | 0.0992976 | 0.1279363 | 0.3518263 | 0.1658955 | 0.2762333 |
| Spin4      | 0.1582552 | 0.154557  | 0.1793356 | 0.2834617 | 0.3697301 | 0.3898571 |
| Tex12      | 0.0431679 | 0.0533353 | 0.0302182 | 0.133689  | 0.1213416 | 0.1697955 |

|             |           |           |           |           |           |           |
|-------------|-----------|-----------|-----------|-----------|-----------|-----------|
| Sac3d1      | 0.9699864 | 0.8889447 | 1.0040213 | 0.7348179 | 0.695309  | 0.6996865 |
| Peli3       | 0.7410886 | 0.7132307 | 0.7206401 | 0.5445776 | 0.5245787 | 0.4158798 |
| Ky          | 0.0135344 | 0.0076226 | 0.0385255 | 0.1799796 | 0.0500944 | 0.0917476 |
| Rtkn2       | 0.0022493 | 0.009976  | 0.0108767 | 0.0432923 | 0.0364356 | 0.061279  |
| LOC10254810 | 0.2834591 | 0.180415  | 0.2067799 | 0.5735761 | 0.3875204 | 0.418676  |
| Rab8b       | 0.4323523 | 0.7148171 | 0.6033115 | 0.9692077 | 0.9799195 | 0.9362849 |
| Aspm        | 0.0697639 | 0.0986209 | 0.0633798 | 0.1823755 | 0.1687477 | 0.1965372 |
| RGD1560885  | 0.0938307 | 0.1460931 | 0.1341057 | 0.3023259 | 0.2804159 | 0.259896  |
| Gpsm3       | 0.7800101 | 0.9474127 | 0.776579  | 0.5545711 | 0.5564738 | 0.5633313 |
| Zfp113      | 0.3156272 | 0.4053057 | 0.4172206 | 0.6029442 | 0.6143218 | 0.6183746 |
| Kif20b      | 0.1487226 | 0.1135183 | 0.1445995 | 0.2852403 | 0.3042313 | 0.2883084 |
| Musk        | 0.0700622 | 0.0489133 | 0.0630087 | 0.2310655 | 0.1736986 | 0.1645682 |
| Igha        | 2.2346618 | 2.8043282 | 1.5682637 | 1.828811  | 1.8259933 | 1.8960899 |
| LOC499643   | 0.0921412 | 0.0425074 | 0.0424211 | 0.2385681 | 0.1877909 | 0.2219489 |
| LOC1025539  | 0.0179239 | 0.005088  | 0         | 0.049803  | 0.0561737 | 0.1087823 |
| RGD1307947  | 0.3730013 | 0.4105144 | 0.3883965 | 0.6101394 | 0.6468223 | 0.6313302 |
| Gria2       | 0         | 0         | 0         | 0.0053471 | 0.0065017 | 0.0148664 |
| Srrm5       | 0         | 0         | 0         | 0.0204162 | 0.0247337 | 0.055112  |
| RGD1562378  | 1.0000132 | 0.8113133 | 1.142354  | 0.6578201 | 0.5870968 | 0.7882736 |
| Ankrd61     | 0.0934062 | 0.1032723 | 0.1401574 | 0.2839019 | 0.3298925 | 0.3125304 |
| LOC1025567  | 0         | 0.00299   | 0.0077889 | 0.0346714 | 0.0267799 | 0.0212146 |
| Epha4       | 0.3630323 | 0.2498609 | 0.3459139 | 0.497325  | 0.5680963 | 0.5307701 |
| Pi15        | 0.0136716 | 0         | 0         | 0.0791184 | 0.0605934 | 0.0562455 |
| Arr3        | 0.0355981 | 0.082871  | 0.041443  | 0.2278222 | 0.1360598 | 0.2881965 |
| Efcab1      | 0.0153258 | 0.0295143 | 0.0365151 | 0.0627236 | 0.1625743 | 0.1603123 |
| LOC1009104  | 1.1001479 | 0.2185508 | 0.3684943 | 0.2081785 | 0.238882  | 0.2908926 |
| Pak3        | 0.0062799 | 0.0023525 | 0.0101778 | 0.0760384 | 0.0249356 | 0.0200418 |
| Nckap5      | 0.0610601 | 0.0431842 | 0.0557321 | 0.1366241 | 0.1237904 | 0.1962024 |
| RGD1560730  | 0.2265129 | 0.2203775 | 0.2078536 | 0.4989676 | 0.3682557 | 0.4647871 |
| LOC1009115  | 0.2056124 | 0.070268  | 0.0451392 | 0.009263  | 0.0265313 | 0.0104018 |
| Gcnt7       | 0         | 0.0181213 | 0.0091358 | 0.069149  | 0.0461356 | 0.0662021 |
| LOC1009115  | 0         | 0.009105  | 0.0039984 | 0.0590463 | 0.0076334 | 0.1705646 |
| Fam83b      | 0.0787178 | 0.0897237 | 0.0701584 | 0.1538714 | 0.2648901 | 0.2374247 |
| LOC1009105  | 0.234265  | 0.2117857 | 0.2426178 | 0.2916652 | 1.1108314 | 0.350647  |
| Rnf24       | 0.391405  | 0.4079704 | 0.4926336 | 0.8383403 | 0.8410253 | 0.781328  |
| Rps4y2      | 1.2049394 | 0.9841525 | 1.17871   | 0.7852853 | 0.9132377 | 0.8457486 |
| Ift27       | 1.0699801 | 1.0270857 | 1.0186522 | 0.7516173 | 0.8208548 | 0.7809092 |
| Chst12      | 0.5929848 | 0.7825986 | 0.5914417 | 0.3965672 | 0.3730256 | 0.4503343 |
| Tpbgl       | 0.275382  | 0.294925  | 0.3550935 | 0.1318092 | 0.1213516 | 0.1565963 |
| Klk1c6      | 0.0219086 | 0.0475738 | 0.0317359 | 0.1050172 | 0.0856501 | 0.5025765 |
| LOC502908   | 0.0046449 | 0.0204099 | 0.0134733 | 0.1068972 | 0.0171469 | 0.2327323 |
| Brd2        | 0.8147275 | 0.3568162 | 0.2956569 | 0.2637246 | 0.232376  | 0.2349254 |
| Nek10       | 0.0107106 | 0.0070195 | 0.0087383 | 0.0358324 | 0.0230675 | 0.056691  |
| Ccnt1       | 0.0114456 | 0.0252039 | 0.0300874 | 0.083425  | 0.1160446 | 0.0825231 |
| Creb5       | 0.0311037 | 0.0358001 | 0.0521327 | 0.1607429 | 0.0788074 | 0.1209045 |
| Ggt7        | 0.2731106 | 0.3178593 | 0.2475317 | 0.0992492 | 0.120428  | 0.1414276 |
| Cybb        | 0.613636  | 0.9692585 | 0.7411974 | 1.1696752 | 0.9602191 | 1.1340198 |
| No18        | 0.0672296 | 0.0684749 | 0.0919113 | 0.1738556 | 0.14933   | 0.3181659 |
| Zfp458      | 0.092091  | 0.1948625 | 0.1820682 | 0.3228112 | 0.3931089 | 0.361434  |
| LOC287274   | 0.1646385 | 0.4683453 | 1.0936608 | 0.3038063 | 0.1620159 | 0.1544445 |
| Cask        | 0.3080809 | 0.444319  | 0.312034  | 0.5970716 | 0.596968  | 0.5525176 |

|             |           |           |           |           |           |           |
|-------------|-----------|-----------|-----------|-----------|-----------|-----------|
| Hils1       | 0         | 0         | 0         | 0.0634314 | 0.0422289 | 0.0814553 |
| RGD15648612 | 3.3686025 | 3.267904  | 1.6250618 | 2.1333403 | 2.0421262 | 2.0451719 |
| Fzd3        | 0.3422157 | 0.3855263 | 0.3943361 | 0.6200785 | 0.5399289 | 0.6368494 |
| LOC1009106  | 0.3287807 | 0.026344  | 0.0174309 | 0.0057954 | 0.0112194 | 0.0065111 |
| Atad5       | 0.1149076 | 0.1663312 | 0.1516284 | 0.2928927 | 0.2656082 | 0.275863  |
| LOC1025474  | 0.2020387 | 0.209596  | 0.1851215 | 0.3453679 | 0.3694841 | 0.3472692 |
| Ckap2       | 0.0181288 | 0.075821  | 0.0413654 | 0.1615882 | 0.1994049 | 0.1449599 |
| RGD1560207  | 0.0049965 | 0.027238  | 0.0024475 | 0.0772435 | 0.0734208 | 0.0607309 |
| Gpr153      | 0.2915752 | 0.2675411 | 0.2651156 | 0.1373957 | 0.1382054 | 0.1281438 |
| Jade3       | 0.2485883 | 0.3574699 | 0.301172  | 0.5185709 | 0.4857073 | 0.6093479 |
| F10         | 0.0966129 | 0.1880759 | 0.1351486 | 0.0439293 | 0.0325224 | 0.0252419 |
| LOC1036901  | 0.0487784 | 0.040093  | 0.5429603 | 0.0089301 | 0.0338034 | 0.0479758 |
| Caln1       | 0.6449741 | 0.4538459 | 0.6109364 | 0.7824143 | 0.9162905 | 0.8302185 |
| Napb        | 0.4003127 | 0.4075325 | 0.3974309 | 0.6381589 | 0.656524  | 0.6147786 |
| Zfp280c     | 0.2909778 | 0.4974897 | 0.4026746 | 0.6411015 | 0.6254203 | 0.6886871 |
| LOC1036940  | 0.110971  | 0.1624611 | 0.2148059 | 0.4165064 | 0.3202268 | 0.4105084 |
| Ier2        | 1.795103  | 1.3997425 | 1.2245489 | 1.0635173 | 1.0969549 | 1.3581223 |
| LOC1036948  | 0.0322952 | 0.0301823 | 0.0416067 | 0.0260591 | 0.0278625 | 0.6622786 |
| LOC1083515  | 0         | 0         | 0         | 0.0636544 | 0.062115  | 0.0599093 |
| Mapk15      | 0.0945928 | 0.1257301 | 0.1169448 | 0.0198575 | 0.0317927 | 0.0434458 |
| Nt5c        | 0.8897673 | 0.9246454 | 0.9190412 | 0.6172808 | 0.5860611 | 0.659288  |
| LOC1036927  | 1.6987671 | 2.7761458 | 1.0005847 | 1.692273  | 1.2471498 | 1.0163513 |
| Mmp23       | 0.8660761 | 0.7936431 | 0.7429811 | 0.5654601 | 0.5801027 | 0.5793918 |
| Cenpe       | 0.0254799 | 0.0527145 | 0.0515753 | 0.1407701 | 0.1142408 | 0.1119026 |
| Atad2       | 0.1359568 | 0.3154395 | 0.241764  | 0.4378269 | 0.4069676 | 0.4652338 |
| Fkbp10      | 0.5790818 | 0.7095347 | 0.6572452 | 0.4217349 | 0.417325  | 0.4746    |
| LOC1036948  | 0.608768  | 0.7499562 | 0.6989989 | 0.4593479 | 0.2783392 | 0.2735423 |
| LOC1009124  | 0.1439464 | 0.1436756 | 0.070545  | 0.0462256 | 0.0127676 | 0.0147057 |
| Rps6ka6     | 0.2093458 | 0.3031243 | 0.2428028 | 0.4260362 | 0.4234805 | 0.5119745 |
| Sh2b2       | 0.3918476 | 0.2599689 | 0.3129558 | 0.1496428 | 0.1378394 | 0.1627798 |
| Zfp300      | 0.0533233 | 0.0613656 | 0.059654  | 0.1508718 | 0.1266935 | 0.2107345 |
| Ddx60       | 0.0363602 | 0.040482  | 0.0815966 | 0.188202  | 0.1039611 | 0.1826366 |
| Ogfod1      | 0.4559635 | 0.4203884 | 0.4857918 | 0.7026653 | 0.7075102 | 0.7302702 |
| LOC1009095  | 0.7052958 | 0.0845596 | 0.0882141 | 0.0736083 | 0.0583976 | 0.0589483 |
| Hectd2      | 0.1197578 | 0.1636037 | 0.1386022 | 0.2896008 | 0.2674944 | 0.329116  |
| LOC1003631  | 0.0143254 | 0.0463203 | 0         | 0.1106343 | 0.1676141 | 0.1782493 |
| Zfp575      | 0.1866856 | 0.1418362 | 0.1498884 | 0.0455671 | 0.044443  | 0.0345987 |
| Rab30       | 0.1635586 | 0.1980364 | 0.1427031 | 0.2967769 | 0.3058719 | 0.3051784 |
| Mir336      | 0         | 0         | 0         | 0.4710561 | 0.2137452 | 0.3470118 |
| LOC1009122  | 0.2634054 | 0.1876838 | 0.2131568 | 0.4599096 | 0.3957586 | 0.4271919 |
| Cep97       | 0.2858013 | 0.3140251 | 0.3155557 | 0.5415558 | 0.4828079 | 0.5545177 |
| LOC1025549  | 0.2854827 | 1.2606881 | 0         | 0.1255224 | 0.0855115 | 0         |
| Rasd1       | 0.9862211 | 0.6346674 | 0.401946  | 0.4243486 | 0.4080452 | 0.4371398 |
| Pnliprpl    | 0.0239677 | 0.0757029 | 0.1062299 | 0         | 0.0113857 | 0.0066081 |
| Stox2       | 0.1718648 | 0.1940931 | 0.1980927 | 0.3172837 | 0.3232847 | 0.3482778 |
| Ppp1r1b     | 1.6546507 | 1.2502563 | 1.3969714 | 0.9760188 | 1.2663941 | 1.2687971 |
| Slc25a40    | 0.7081744 | 0.6547707 | 0.6517108 | 0.9519076 | 0.897452  | 0.9672762 |
| LOC1009107  | 0.187178  | 0.0494318 | 0.2734986 | 0.4724793 | 0.4106054 | 0.4864947 |
| Gpr17       | 0.0517771 | 0.0438493 | 0.0196898 | 0.1153743 | 0.1321547 | 0.1674528 |
| LOC1009100  | 0.1907022 | 0.1822935 | 0.1597366 | 0.3393402 | 0.3094961 | 0.3431783 |
| Nxph4       | 1.0088546 | 0.9028899 | 0.8877871 | 0.6308839 | 0.651658  | 0.7617057 |

|            |           |           |           |           |           |           |
|------------|-----------|-----------|-----------|-----------|-----------|-----------|
| LOC1083480 | 0.4015331 | 0.2512757 | 0.492896  | 0.1871225 | 0.1382149 | 0.1220289 |
| Top2a      | 0.0811837 | 0.2032762 | 0.0886356 | 0.3294127 | 0.2927642 | 0.2837025 |
| LOC1083525 | 0         | 0         | 0         | 0.0320844 | 0.003589  | 0.043509  |
| Fam212a    | 0.4628466 | 0.4922094 | 0.5183285 | 0.2172496 | 0.2744668 | 0.2435323 |
| Cd109      | 0.018333  | 0.0123909 | 0.0143918 | 0.0556752 | 0.0574004 | 0.0603709 |
| LOC1025510 | 0.453151  | 0.463437  | 0.5297904 | 0.6203626 | 0.6887698 | 0.8319013 |
| LOC500028  | 0.4765465 | 0.3678431 | 0.4459934 | 0.700978  | 0.823939  | 0.7476718 |
| LOC1036936 | 0.3873088 | 0.4080822 | 0.3143092 | 0.6272315 | 0.6599614 | 0.6362023 |
| Lnp        | 0.2143134 | 0.3851594 | 0.3823307 | 0.5334704 | 0.5332499 | 0.6190417 |
| Ttpa       | 0.1829944 | 0.2003727 | 0.2084023 | 0.364448  | 0.4153639 | 0.3956498 |
| Rbms3      | 0.3485004 | 0.4129573 | 0.2996957 | 0.5425049 | 0.5114085 | 0.6482264 |
| LOC1083481 | 0.0218578 | 0.0147925 | 0.0255125 | 0.0732012 | 0.078514  | 0.0774676 |
| Slc22a7    | 1.2638937 | 1.1031221 | 1.0369042 | 0.4833001 | 0.9974918 | 0.8109157 |
| LOC1025472 | 0.5412464 | 0.5057219 | 0.4764457 | 0.7861105 | 0.7341732 | 0.7834434 |
| Fam111a    | 1.1588571 | 0.1392286 | 0.0522916 | 0.177156  | 0.1501869 | 0.1582624 |
| Mki67      | 0.0864944 | 0.1960203 | 0.1110081 | 0.2999078 | 0.243171  | 0.2644358 |
| Adamts13   | 0.1956852 | 0.2334354 | 0.2337618 | 0.3342007 | 0.3787659 | 0.4082199 |
| Trim66     | 0.1720729 | 0.3027983 | 0.3488585 | 0.39279   | 0.5205145 | 0.4656151 |
| Vwa5a      | 0.1515268 | 0.1846185 | 0.14081   | 0.191192  | 0.7448926 | 0.2230857 |
| Gas213     | 0.0066144 | 0.0092219 | 0.0359087 | 0.0894331 | 0.0528196 | 0.0950556 |
| LOC690471  | 0.6884674 | 1.2479062 | 0.2862441 | 0.196974  | 0.3259238 | 0.4381141 |
| LOC691135  | 0.1833455 | 0.2187432 | 0.2122834 | 0.3695243 | 0.3811526 | 0.440914  |
| Intu       | 0.1463192 | 0.2014764 | 0.1992655 | 0.3851955 | 0.3385009 | 0.4245796 |
| Fut9       | 0         | 0.0552359 | 0         | 0.1913276 | 0.0954997 | 0.1922649 |
| Mamdc2     | 0.1573678 | 0.1111537 | 0.2223305 | 0.3705327 | 0.3404611 | 0.3610319 |
| LOC1025530 | 0.1975569 | 1.3205124 | 0.080842  | 0.2052138 | 0.0207879 | 0.1788025 |
| Syne4      | 0         | 0.0641422 | 0.0630842 | 0.1545347 | 0.3918663 | 0.1531663 |
| LOC1025481 | 0         | 0.0081555 | 0.0311986 | 0.092081  | 0.0927141 | 0.0696646 |
| Mir146a    | 0         | 0         | 0         | 0.3221054 | 0.2687495 | 0.3950637 |
| LOC685406  | 0         | 0         | 0.0268374 | 0.2114712 | 0.1157824 | 0.1742798 |
| Ocm2       | 0.0704802 | 0.283275  | 0         | 0         | 0         | 0         |
| Cntnap3b   | 0.0224107 | 0.0051157 | 0.0121836 | 0.0693286 | 0.0361395 | 0.0624127 |
| LOC1009112 | 1.4149536 | 0.0256869 | 0.2917259 | 0.1519328 | 0.3053342 | 0.0918342 |
| Slpi       | 0.041328  | 0.3257006 | 0.1222384 | 0.0269336 | 0.013326  | 0         |
| Cxcl14     | 0.4194824 | 0.5187432 | 0.4304752 | 0.2429756 | 0.1431172 | 0.2790223 |
| Eda2r      | 0.0182057 | 0         | 0         | 0.0473644 | 0.0554895 | 0.0634579 |
| Csrnp3     | 0.2666228 | 0.2399434 | 0.2457825 | 0.4398285 | 0.506873  | 0.4406594 |
| Fam60a     | 0.2279227 | 0.1730737 | 0.3375837 | 0.4918541 | 0.5339383 | 0.4430962 |
| Inpp5b     | 0.4183458 | 0.2469682 | 0.2531792 | 0.6212667 | 0.4837241 | 0.5321155 |
| Alkbh6     | 0.3583934 | 0.1969688 | 0.1349455 | 0.0547976 | 0.0857613 | 0.0316538 |
| Fbxo32     | 0.5686096 | 0.5010911 | 0.5020346 | 0.7737639 | 0.8444906 | 0.816527  |
| Tnks2      | 0.056895  | 0.2184777 | 0.1276941 | 0.1204312 | 0.3128226 | 0.6881493 |
| Apba1      | 0.055309  | 0.1108178 | 0.0921928 | 0.2328852 | 0.2267595 | 0.1953653 |
| Pdgfd      | 0.3216387 | 0.4713338 | 0.3787016 | 0.6465744 | 0.6315803 | 0.7329926 |
| Camk2n2    | 1.1750899 | 0.850972  | 1.0706447 | 0.727088  | 0.524464  | 0.7213588 |
| LOC687780  | 0.880333  | 1.0198462 | 0.9041894 | 0.5533274 | 0.6903949 | 0.5802332 |
| B3galt4    | 0.6600373 | 0.7065355 | 0.7402532 | 0.4243667 | 0.477291  | 0.4957208 |
| Lacc1      | 0.1534382 | 0.1881603 | 0.1624535 | 0.3418215 | 0.2569958 | 0.3126261 |
| Mcpt1      | 0         | 0         | 0         | 0.1513432 | 0         | 0.0957725 |
| LOC1009126 | 0.0711906 | 0.0625781 | 0.0624539 | 0.6799719 | 0.0669897 | 0.1278419 |
| Mfap2      | 0.5173004 | 0.5190608 | 0.4788323 | 0.2270868 | 0.1960855 | 0.3295642 |

|             |           |           |           |           |           |           |
|-------------|-----------|-----------|-----------|-----------|-----------|-----------|
| Fosb        | 0.5768051 | 0.1136503 | 0.096255  | 0.0880989 | 0.0631345 | 0.0928705 |
| LOC10834810 | 0.5297014 | 0.6953167 | 0.7135229 | 0.4192643 | 0.4467896 | 0.4360498 |
| LOC1003621  | 0.079101  | 0.0539519 | 0.0831711 | 0.2166077 | 0.2029061 | 0.1325664 |
| Chml        | 0.1070397 | 0.1631608 | 0.1525634 | 0.3285177 | 0.3064258 | 0.3365916 |
| LOC1083531  | 0         | 0         | 0         | 0.0302585 | 0.0703008 | 0.1478856 |
| LOC1083482  | 0.0089556 | 0.0197881 | 0         | 0.0719758 | 0.1114736 | 0.0635744 |
| LOC1003632  | 0.5968808 | 2.0779102 | 0.0693151 | 0.1952493 | 0.7298172 | 0.0987517 |
| LOC10834810 | 0.2080687 | 0.1589719 | 0.1349748 | 0.827256  | 0.270265  | 0.2568819 |
| Prrgl       | 0.1875978 | 0.2107384 | 0.2358436 | 0.4137495 | 0.353929  | 0.4110686 |
| LOC502834   | 0.4526432 | 1.4403341 | 0.1476375 | 0.3634529 | 0.2494908 | 0.3062171 |
| Clgn        | 0.0228273 | 0.0143281 | 0.0125364 | 0.0540678 | 0.0978326 | 0.057891  |
| Pfn2        | 0.1556265 | 0.1847876 | 0.1775809 | 0.5524822 | 0.369531  | 0.2476282 |
| RGD1561812  | 0.0389156 | 0.0328829 | 0.0288466 | 0.111555  | 0.1479732 | 0.0708949 |
| Hmmr        | 0.1339324 | 0.1821597 | 0.1222151 | 0.3418463 | 0.3497091 | 0.2889871 |
| P2ry4       | 0.0334293 | 0.0891468 | 0.073622  | 0.1647967 | 0.1713081 | 0.1758763 |
| Galnt5      | 0.0106182 | 0.002996  | 0         | 0.0275243 | 0.0172654 | 0.0960269 |
| Ciart       | 0.5104169 | 0.4604845 | 0.7398942 | 0.1315578 | 0.3204209 | 0.3603958 |
| Lilra5      | 0.3314397 | 0.4790036 | 0.3645818 | 0.6620462 | 0.6416146 | 0.6407811 |
| LOC1009118  | 0         | 0         | 0         | 0.0332545 | 0.016514  | 0.1032707 |
| Zfp763      | 0.1964162 | 0.2784225 | 0.2680157 | 0.4128648 | 0.4058943 | 0.5156129 |
| Znf761      | 0.2024657 | 0.2394559 | 0.2368339 | 0.348012  | 0.3891377 | 0.4721697 |
| Bmp3        | 0.3538675 | 0.5524933 | 0.4220449 | 0.683373  | 0.8195916 | 0.6048614 |
| LOC1009119  | 0.1474592 | 0.1108473 | 0.1079173 | 0.6596485 | 0.5218463 | 0.0450294 |
| Dnajb7      | 0.034479  | 0.0309843 | 0.020538  | 0.0872127 | 0.1468429 | 0.1549384 |
| LOC1083531  | 0         | 0         | 0.0090774 | 0.0304984 | 0.0458524 | 0.0388138 |
| Flrt3       | 0.2039489 | 0.257218  | 0.2737425 | 0.3504347 | 0.4480785 | 0.5749007 |
| Zfp36       | 1.9783431 | 1.6297181 | 1.3737871 | 1.4180959 | 1.353394  | 1.5022899 |
| LOC1009117  | 0.6522767 | 0.4027667 | 0.2553833 | 1.6960457 | 0.5909146 | 0.2359625 |
| LOC1025521  | 0.475554  | 1.213988  | 0.0992075 | 0.2077251 | 0.3272679 | 0.1085562 |
| Noxol       | 0.0209247 | 0.2521014 | 0.0204507 | 0         | 0.0099219 | 0.0114336 |
| LOC1025562  | 0.7222582 | 0.6475409 | 0.6139056 | 0.404838  | 0.4936875 | 0.4414614 |
| RGD1559600  | 0.4037461 | 0.5548713 | 0.4475876 | 0.7401848 | 0.743449  | 0.6869288 |
| Asb15       | 0.2096757 | 0.1992901 | 0.3312186 | 0.4559197 | 0.4779437 | 0.5046501 |
| LOC1009122  | 0.0040621 | 0         | 0.0019887 | 0.0210583 | 0.0150224 | 0.0215144 |
| Micb        | 0.139772  | 0.1537351 | 0.0834728 | 0.3065023 | 0.3494215 | 0.3045229 |
| Tspan4      | 0.8760957 | 0.7757297 | 0.3203629 | 0.3970745 | 0.4040899 | 0.2576679 |
| Zfp82       | 0.0022606 | 0.0149532 | 0.0109309 | 0.0551684 | 0.0519429 | 0.035275  |
| Emid1       | 0.9770406 | 0.8156373 | 0.8162758 | 0.6746443 | 0.5356209 | 0.6951562 |
| LOC1009094  | 0         | 0         | 0         | 0.036318  | 0.0239265 | 0.0275056 |
| Ppml        | 0.0487661 | 0.0261413 | 0.0164872 | 0.120526  | 0.1250931 | 0.0933404 |
| LOC10834810 | 0.0218578 | 0.0902529 | 0.0611739 | 0.6977565 | 0.0825825 | 0.060237  |
| Cpa3        | 0         | 0         | 0         | 0.0590223 | 0         | 0.095353  |
| Myct1       | 0.3392647 | 0.4435116 | 0.3254701 | 0.6149015 | 0.6146154 | 0.643734  |
| Ceacam20    | 0.533161  | 1.26265   | 1.068084  | 0.4722429 | 0.7681341 | 0.6739963 |
| Pla2g2a     | 0.2146179 | 1.0090114 | 0.2365914 | 0.1516122 | 0.1698985 | 0.2556052 |
| LOC10255210 | 0.0795408 | 0.1632602 | 0.1082096 | 0.2213813 | 0.3026355 | 0.284772  |
| Bche        | 0         | 0.0219254 | 0.0284972 | 0.0711352 | 0.0773763 | 0.1303995 |
| Zc3h12b     | 0.01154   | 0.0097033 | 0.0056745 | 0.0427888 | 0.0442096 | 0.042131  |
| Uts2r       | 0.0534712 | 0.0432441 | 0.0989783 | 0.0153536 | 0         | 0         |
| LOC1036900  | 0.9945597 | 0.1320566 | 1.0904766 | 0.0583099 | 0.1130825 | 0.5188321 |
| Mif         | 0.861886  | 0.9250416 | 0.8718905 | 2.0350604 | 0.7274261 | 0.7718294 |

LOC1025505 0.5705721 0.1236777 0.3606906 0.0714393 0.1866699 0.1415549  
 LOC1083480 0.0932753 0.205623 0.0694284 0.3562064 0.2058854 0.4263256  
 Nefh 0.2085386 0.1515301 0.1816188 0.0736506 0.0757688 0.0819988  
 LOC1036900 0.4830877 0.6755294 0.5685321 0.8863935 0.7729724 0.8777703  
 Nav3 0.0442847 0.0772768 0.0343024 0.1448968 0.1015791 0.1665087  
 Hlx 0.7561483 0.5331031 0.5207865 0.3510026 0.4012841 0.3859578  
 Mcpt812 0 0 0 0.0874336 0 0.1516605  
 Parpbp 0.0048589 0.0187227 0.0094423 0.0488173 0.0696013 0.0379069  
 Tmem236 0.3753183 0.176357 0.276305 0.5745712 0.4518951 0.6594646  
 Car3 0.3702309 0.8945125 0.1773382 1.1592683 0.6447545 1.3801805  
 Hspb2 1.0418232 0.9667555 0.9580559 0.6552066 0.7370447 0.7646621  
 Kif18a 0.0542739 0.0741397 0.0844138 0.2113892 0.1477006 0.1853616  
 Serpine1 1.0022874 0.751524 0.6205525 0.5698822 0.4751258 0.6609796  
 Upk3b 0.0236473 0.0592134 0.0450582 0.2256647 0.0699107 0.2616533  
 LOC1036948 0.949346 1.2087317 1.2014502 0.7136073 0.8144688 0.9589598  
 Pcdhb22 0.0540295 0.0815025 0.0492806 0.1518072 0.1800945 0.1377729  
 Mblac2 0.4277263 0.4112992 0.4858111 0.6345342 0.6936032 0.713975  
 Capns1 1.8235348 1.7648626 1.8156637 1.5801291 0.7885447 1.5649977  
 Dusp4 0.2149029 0.1675157 0.176178 0.3685412 0.4194779 0.4185125  
 Meis3 0.6377286 0.6332554 0.6063893 0.4026869 0.4218913 0.4303718  
 Adamts7 0.3567078 0.4043459 0.3449097 0.2551358 0.1805165 0.2302308  
 LOC1083508 0.0022455 0.0050083 0.0087086 0.0432235 0.0225902 0.0259754  
 Kn11 0.0022737 0.0199376 0.0077245 0.0496439 0.0338638 0.0444607  
 Slco1b2 0.0118219 0 0.0058141 0.0489732 0.0218819 0.0546978  
 Cyp21a1 0.5771931 0.440897 0.4866475 0.268388 0.2773674 0.3346446  
 LOC1025468 2.0295846 2.9736243 1.1036842 1.8888383 1.7835074 1.6655777  
 RGD1563962 0.3926597 0.1442905 0.2898615 0.1112344 0.0767684 0.131778  
 RGD1563231 0.8170838 1.4931414 0.2933323 0.4231105 0.5295873 0.5744319  
 Cracr2b 0.8942743 1.023496 0.3793746 0.306467 0.5487211 0.5487795  
 Mcpt111 0 0 0 0.1014527 0 0.0809306  
 Rel12 0.4475567 0.3878218 0.383527 0.2420579 0.2098381 0.1762717  
 Dnah10 0.0143719 0.0119178 0.0288109 0.0036489 0.0053211 0.0054592  
 Rabep2 1.115671 1.3243239 1.3802396 1.0881769 0.6651274 1.157781  
 LOC1025578 0.0547945 0.0064849 0.053599 0.2709323 0.166097 0.0804429  
 Dear 0 0 0 0.0348213 0.002708 0.0123658  
 RGD1563091 0.2611423 0.4854367 0.3113716 0.6308166 0.4435386 0.630798  
 Lhcgr 0.0131159 0.0558392 0.0221859 0.1291473 0.170518 0.0603709  
 LOC1025541 0.1509119 0.252909 0.1086019 0.5558456 0.4075961 0.3788077  
 Clecla 0.2545589 0.4457182 0.3944351 0.6390883 0.5438123 0.5646638  
 Galnt6 0.3603453 0.4596087 0.2633124 0.1849282 0.1514225 0.233552  
 Olr1584 0 0.0034362 0.0205894 0.0476774 0.0477992 0.0517829  
 Fam156b 0.0063962 0.0256585 0.0495175 0.1263073 0.0855204 0.0936155  
 Cym 0.0692535 0.0323619 0.0980569 0.0142 0 0.0080405  
 LOC690255 0.5100315 1.2583236 0.1258219 0.0865271 0.3278551 0.3125123  
 Jph2 0.3347832 0.3393893 0.2293911 0.1577669 0.1413224 0.1616391  
 Gvinp1 0.0114298 0 0.0025067 0.0446322 0.0165493 0.033451  
 LOC1025518 0.1566238 0.1468183 0.145137 0.2429342 0.2594909 0.3880017  
 Galnt13 0.222914 0.2007587 0.2351129 0.3685072 0.3856322 0.4643388  
 Akt3 0.3545659 0.4283412 0.3284499 0.6284346 0.6078322 0.6096052  
 Hdac9 0.1340547 0.2753703 0.2092978 0.3687127 0.3777136 0.387266  
 LOC1003611 0.5034753 1.5295594 0.075529 0.2186034 0.4573243 0.3441153



|             |           |           |           |           |           |           |
|-------------|-----------|-----------|-----------|-----------|-----------|-----------|
| Tmem86a     | 1.5086575 | 0.9572052 | 1.0706577 | 0.8041542 | 0.8716654 | 1.0856909 |
| Fcgbp       | 0.1906063 | 0.2198783 | 0.1748073 | 0.0789179 | 0.1066606 | 0.1131988 |
| Lrfn3       | 0.5678765 | 0.3607009 | 0.5789357 | 0.0748604 | 0.2486566 | 0.3541019 |
| Htr2a       | 0.0347329 | 0.0132792 | 0         | 0.084015  | 0.1469928 | 0.0606947 |
| LOC1025537  | 0.1087968 | 0.7466462 | 0.0540077 | 0.096075  | 0.0893681 | 0.0810381 |
| Prdm10      | 0.1351914 | 0.1953586 | 0.1663299 | 0.3088422 | 0.3165243 | 0.2414181 |
| Slc25a36    | 0.0425958 | 0.0584675 | 0.0366604 | 0.10463   | 0.1709806 | 0.168319  |
| RGD1561247  | 0.0927725 | 1.2232112 | 0.0477857 | 0.1463207 | 0.0671598 | 0.1803613 |
| LOC10835310 | 0.1231356 | 0.0731189 | 0.137852  | 0.2679781 | 0.3004971 | 0.2616804 |
| Ccnb3       | 0.027566  | 0.0782309 | 0.0465927 | 0.0873907 | 0.1935881 | 0.165282  |
| LOC1025555  | 0.0222181 | 0.3006578 | 0.0423967 | 0         | 0         | 0         |
| Mkx         | 0         | 0         | 0         | 0.0037129 | 0.007204  | 0.0164554 |
| Rufy2       | 0.2972698 | 0.1709683 | 0.1926642 | 0.5061699 | 0.4312882 | 0.3857464 |
| LOC1003655  | 0.2131524 | 0.30052   | 0.3012438 | 0.4467223 | 0.4641451 | 0.4968163 |
| Soat2       | 0.0639141 | 0.027967  | 0.1107186 | 0.020207  | 0.0079852 | 0         |
| LOC1009115  | 0.0170521 | 0.2219396 | 0.0728165 | 0.0217373 | 0.0211867 | 0.0282989 |
| LOC1083524  | 0         | 0         | 0         | 0.0052641 | 0.0012878 | 0.0175075 |
| LOC1009108  | 0.2048956 | 0.0824726 | 0.1051342 | 0.3004449 | 0.2760675 | 0.3172136 |
| RGD1359290  | 1.9179917 | 1.964209  | 2.2240006 | 1.7074031 | 1.7708752 | 0.7741512 |
| Kcnma1      | 0.0849584 | 0.0698822 | 0.0887356 | 0.1760987 | 0.2169967 | 0.1547794 |
| Cep295n1    | 0.0052936 | 0.0117562 | 0.0051715 | 0.0391401 | 0.0171125 | 0.0690466 |
| Slc2a12     | 0.3837316 | 0.6013155 | 0.4485973 | 0.6788932 | 0.8955979 | 0.541017  |
| Senp1       | 0.1553924 | 0.1928479 | 0.1443716 | 0.323005  | 0.26693   | 0.2935239 |
| LOC500174   | 0.2590299 | 0.9224691 | 0.1275754 | 0.1931361 | 0         | 0.0751516 |
| Stk26       | 0.1833088 | 0.2636012 | 0.200632  | 0.3792783 | 0.4168021 | 0.3849803 |
| Calcr       | 0.2024649 | 0.1871087 | 0.2537921 | 0.3307857 | 0.3714745 | 0.4781257 |
| Armcx6      | 0.3295648 | 0.2034753 | 0.3514605 | 0.1579794 | 0.1470773 | 0.1541342 |
| Lrriq1      | 0.0080551 | 0.0195631 | 0.0047391 | 0.0359817 | 0.0392774 | 0.0544409 |
| Ankar       | 0.0122774 | 0.0091895 | 0.0013494 | 0.0525502 | 0.0288193 | 0.0275242 |
| Gnrh1       | 0.2965103 | 0.3722527 | 0.2707902 | 0.7425336 | 0.6219517 | 0.4866576 |
| LOC1036920  | 0.6188574 | 0.5051354 | 0.471712  | 0.8011201 | 0.8822784 | 0.6813329 |
| LOC691828   | 0.5599234 | 1.2674033 | 0.0351231 | 0.3175693 | 0.2472526 | 0.1929171 |
| LOC1083505  | 0.0818712 | 0.0906417 | 0.0980569 | 0.1898867 | 0         | 1.0427548 |
| Fbxo48      | 0.0527961 | 0.0606865 | 0.0896057 | 0.1476753 | 0.1648666 | 0.17516   |
| Hcrtr1      | 0.1290655 | 0.2029294 | 0.1843293 | 0.0839487 | 0.0667615 | 0.0397755 |
| Abcg314     | 0.2194448 | 0.258387  | 0.2124409 | 0.4500042 | 0.365041  | 0.472736  |
| Cdcp2       | 0.0057117 | 0.024995  | 0.097661  | 0         | 0.0053503 | 0.0061704 |
| Cmc1        | 1.1021718 | 0.9709727 | 1.3205348 | 0.7888726 | 0.9060217 | 0.9139324 |
| Dnph1       | 1.02077   | 0.9381459 | 1.1547731 | 0.7268271 | 0.7475802 | 0.8111402 |
| Zmat4       | 0.1894506 | 0.2120834 | 0.1844044 | 0.2988798 | 0.2601333 | 0.5671998 |
| LOC1083495  | 0.024276  | 0.0630309 | 0.0302761 | 0.0936984 | 0.1215516 | 0.1160292 |
| Sgcd        | 0.0454441 | 0.0793754 | 0.0847558 | 0.1922052 | 0.1695861 | 0.2190016 |
| Ptgis       | 0.4212772 | 0.4450889 | 0.4302943 | 0.2489959 | 0.1937827 | 0.2685182 |
| Gucy2e      | 0.0777898 | 0.0837156 | 0.0847776 | 0.1659922 | 0.2017232 | 0.1976804 |
| Vsig4       | 0.0259449 | 0.1554695 | 0.0314757 | 0.006378  | 0.0123397 | 0         |
| Gimap1      | 0.5093287 | 0.5448242 | 0.4585304 | 0.3459409 | 0.2360554 | 0.3326637 |
| LOC691851   | 0.1140865 | 0.2905427 | 0.0207383 | 0         | 0.0198983 | 0         |
| Dfnb59      | 0.6852214 | 0.5630386 | 0.606076  | 0.3372224 | 0.3700495 | 0.4916428 |
| Trmt13      | 0.2149945 | 0.2547303 | 0.2671774 | 0.4418471 | 0.4236123 | 0.4769419 |
| Cfap47      | 0         | 0.0472012 | 0.0212401 | 0.0811762 | 0.1045758 | 0.1453478 |
| LOC1025564  | 0         | 0.006642  | 0         | 0.0224155 | 0.0164883 | 0.0281661 |

|            |           |           |           |           |           |           |
|------------|-----------|-----------|-----------|-----------|-----------|-----------|
| Nr4a1      | 1.483045  | 0.780346  | 0.5525936 | 0.7670757 | 0.6439607 | 0.6904895 |
| LOC1003631 | 0         | 0.0063868 | 0         | 0.0370711 | 0.0361479 | 0.0241796 |
| Illa       | 0         | 0.2202036 | 0         | 0         | 0         | 0         |
| Cyp2d3     | 0.1293854 | 0.2309237 | 0.1709747 | 0.0717494 | 0.0746249 | 0.0417856 |
| Cxcr3      | 0.4900674 | 0.4879698 | 0.4247765 | 0.3310391 | 0.2039932 | 0.2247832 |
| Zfp367     | 0.2482185 | 0.290696  | 0.252746  | 0.4442228 | 0.4063043 | 0.4545677 |
| Mzb1       | 0.2936658 | 1.1863748 | 0.1643165 | 0.295917  | 0.2798596 | 0.2430193 |
| RGD1565119 | 0.009554  | 0.015915  | 0.0361923 | 0         | 0         | 0         |
| Zgrf1      | 0.0515966 | 0.0573349 | 0.0946515 | 0.1614929 | 0.1511335 | 0.1489307 |
| RGD1565622 | 0.1070496 | 0.1377473 | 0.1137656 | 0.227654  | 0.2506564 | 0.2370668 |
| Pcdhb11    | 0.0302869 | 0.0421352 | 0.0394506 | 0.0864903 | 0.1009539 | 0.0925812 |
| LOC1036945 | 0.1811335 | 0.2250421 | 0.2335837 | 0.3579109 | 0.3376941 | 0.3970809 |
| Ccr5       | 0.3161387 | 0.5571811 | 0.2867299 | 0.7069855 | 0.6041908 | 0.6933056 |
| Cc15       | 0.8962219 | 1.1212216 | 0.6680099 | 0.6625545 | 0.5702809 | 0.5411848 |
| Ccl19      | 1.1261299 | 1.5251178 | 1.028503  | 0.958701  | 0.9934544 | 0.9899527 |
| Slc9a7     | 0.1193723 | 0.1068869 | 0.0756066 | 0.1886126 | 0.2491263 | 0.2380241 |
| LOC1009098 | 0.2280807 | 0.1348716 | 0.0881047 | 0.0410845 | 0.0685519 | 0.049275  |
| Fzd10      | 0.042216  | 0.022551  | 0.0490876 | 0.0084413 | 0.0055001 | 0.0094802 |
| Alox15     | 0.2611217 | 0.5346484 | 0.3790184 | 0.2127752 | 0.2310953 | 0.1645203 |
| Tlr5       | 0.0487238 | 0.0713754 | 0.049207  | 0.1278777 | 0.1324202 | 0.1414461 |
| Trappc31   | 0.0836546 | 0.0668298 | 0.1037171 | 0.1963853 | 0.2954807 | 0.2216379 |
| Pappa2     | 0.0150233 | 0.0200513 | 0.0279488 | 0.0490432 | 0.0686957 | 0.0576787 |
| Cyp46a1    | 0.1856203 | 0.0761897 | 0.3877098 | 0.0829803 | 0.0612942 | 0.0849885 |
| RGD1561327 | 0.0132354 | 0.0147805 | 0.0097357 | 0.0545593 | 0.0390838 | 0.0702599 |
| Kcnb2      | 0.0034718 | 0.0153249 | 0.0084299 | 0.0322779 | 0.0284235 | 0.05645   |
| P2rx1      | 0.5033196 | 0.530972  | 0.4004237 | 0.2718506 | 0.2075051 | 0.3576606 |
| Mfsd14a    | 0.0300811 | 0.0679576 | 0.0449222 | 0.0898373 | 0.2548806 | 0.1086468 |
| Zfp945     | 0.1261786 | 0.1885284 | 0.1827133 | 0.335995  | 0.2924701 | 0.3026558 |
| Trank1     | 0.0184887 | 0.0250875 | 0.0200307 | 0.0557734 | 0.0500571 | 0.0641986 |
| Mmp20      | 0         | 0         | 0         | 0.0293922 | 0.0049089 | 0.0056618 |
| RGD1563435 | 0.7809069 | 0.7750506 | 0.3276801 | 0.2730615 | 0.3411502 | 0.338655  |
| Comp       | 0.1887471 | 0.1449868 | 0.1067093 | 0.0379703 | 0.0590435 | 0.0674838 |
| LOC691422  | 0.1652619 | 0.1967435 | 0.1954572 | 0.2692196 | 0.3287676 | 0.3785447 |
| LOC1083480 | 0.0397598 | 0.071425  | 0.0550992 | 0.1146374 | 0.1411384 | 0.161083  |
| RGD1560556 | 0.0173154 | 0.0570222 | 0.0196788 | 0.1483863 | 0.0331606 | 0.149326  |
| LOC1036925 | 0.2463137 | 0.331198  | 0.2788184 | 0.4977189 | 0.4956106 | 0.5086511 |
| Ly75       | 0.1145216 | 0.1899202 | 0.0550289 | 0.3139705 | 0.1912471 | 0.3051751 |
| Tlr8       | 0.1103312 | 0.3354313 | 0.1544013 | 0.4572625 | 0.3740373 | 0.4328134 |
| Nrn11      | 0.7790298 | 0.5202853 | 0.9430896 | 0.4850484 | 0.405255  | 0.4996109 |
| Trpm3      | 0.0492068 | 0.0932158 | 0.0662132 | 0.1419189 | 0.1261309 | 0.2086651 |
| Slc22a13   | 0.6237076 | 1.0141761 | 0.3450837 | 0.5214144 | 0.3672466 | 0.188513  |
| Slitrk2    | 0         | 0         | 0         | 0.002531  | 0.0073549 | 0.0056713 |
| Cdh22      | 0.2051066 | 0.0538948 | 0.1228267 | 0.0442351 | 0.0258936 | 0.0548994 |
| Oas1f      | 0.0405329 | 0.1670297 | 0.3148701 | 0.0748431 | 0.0221563 | 0.0065111 |
| Unc13d     | 0.3450663 | 0.514076  | 0.3445999 | 0.2592385 | 0.2035025 | 0.2697654 |
| Klc3       | 0.6282769 | 0.5079093 | 0.6344154 | 0.3841385 | 0.4166074 | 0.3292201 |
| Podn11     | 0.1195422 | 0.1168568 | 0.0932912 | 0.0407042 | 0.0082345 | 0.045512  |
| Fzd9       | 0.5597117 | 0.5400637 | 0.7074585 | 0.3205307 | 0.495132  | 0.3296799 |
| Cst6       | 0.159094  | 0.3901862 | 0.2269559 | 0.0792317 | 0.0947092 | 0.1076515 |
| Enam       | 0         | 0         | 0         | 0.0084616 | 0.0041416 | 0.0141777 |
| Nobox      | 0.0330998 | 0.0333184 | 0.0197038 | 0.0811837 | 0.0765662 | 0.11381   |

|             |           |           |           |           |           |           |
|-------------|-----------|-----------|-----------|-----------|-----------|-----------|
| Pcdhb4      | 0.0252602 | 0.0509315 | 0.0246907 | 0.1042821 | 0.0675271 | 0.156741  |
| Igkv28      | 0.9009518 | 1.7251314 | 0.2209819 | 0.5092555 | 0.6778032 | 0.7424478 |
| LOC10835010 | 0.1949974 | 0.1689466 | 0.1454755 | 0.3235858 | 0.3278998 | 0.4288799 |
| Abcd2       | 0.0233162 | 0.0187313 | 0.0131685 | 0.0808077 | 0.0294192 | 0.0761388 |
| Tekt2       | 0.066774  | 0.0683499 | 0.0446307 | 0         | 0         | 0.0252575 |
| Havcr1      | 0.2020364 | 0.4637281 | 0.6411397 | 1.1085156 | 0.8289792 | 0.3929831 |
| LOC1003626  | 0.9011306 | 0.9709996 | 0.7983923 | 0.6217844 | 0.6254173 | 0.6061787 |
| Ttk         | 0.0249391 | 0.0425196 | 0.0347864 | 0.0821846 | 0.1018885 | 0.1061361 |
| LOC1009095  | 0.2272666 | 0.2014896 | 0.1282798 | 0.3771994 | 0.329987  | 0.4625807 |
| Lemd2       | 0.1693248 | 0.2208242 | 0.1446313 | 0.1249421 | 0.9824683 | 0.1382458 |
| Ect2        | 0.0960169 | 0.1182372 | 0.1571844 | 0.2568682 | 0.2744778 | 0.2238665 |
| Spaca5      | 0         | 0.0365989 | 0.0762492 | 0.1270965 | 0.2207101 | 0.2140821 |
| Zfp136      | 0.1928252 | 0.2014715 | 0.2613804 | 0.3741701 | 0.2651785 | 0.5082887 |
| Krt15       | 0.1631572 | 1.6326385 | 0         | 0.2339731 | 0.0104685 | 0.294831  |
| LOC1083517  | 0.765882  | 0.7962591 | 0.8884342 | 0.54426   | 0.5852356 | 0.5375045 |
| Idi2        | 0.0556355 | 0.031994  | 0.0280633 | 0.2832255 | 0.0989697 | 0.275626  |
| LOC1009120  | 0.2217709 | 0.9618462 | 0.4134876 | 0.2884849 | 0.2907563 | 0.260144  |
| Zfp683      | 0.0455172 | 0.023228  | 0.0397873 | 0.010132  | 0         | 0         |
| Adgrf1      | 0.232157  | 0.3396329 | 0.2435201 | 0.4702763 | 0.4645218 | 0.5083114 |
| Tmem241     | 0.2668672 | 0.3939189 | 0.3060991 | 0.5285332 | 0.5034895 | 0.5649943 |
| Kcnj11      | 0.2401664 | 0.1776271 | 0.0952096 | 0.0664777 | 0.0623568 | 0.079719  |
| Tbxa2r      | 0.5836523 | 0.5615927 | 0.5168392 | 0.3645135 | 0.3954289 | 0.3021809 |
| Fam110d     | 0.7136421 | 0.7844711 | 0.7250015 | 0.3826391 | 0.56508   | 0.554764  |
| Rundc3a     | 0.53927   | 0.4825972 | 0.4059398 | 0.2682881 | 0.3130133 | 0.2819944 |
| Cyp3a18     | 0         | 0.0105098 | 0.0356497 | 0.0393004 | 0.1265435 | 0.1004837 |
| Zfp428      | 0.6196194 | 0.5095077 | 0.5694655 | 0.3317197 | 0.4077181 | 0.3573048 |
| Foxd3       | 0         | 0         | 0         | 0.0126021 | 0.0122797 | 0.0106516 |
| LOC691387   | 0.0030597 | 0.0011435 | 0.0019949 | 0.0078004 | 0.012283  | 0.0130765 |
| LOC1009123  | 0.3072149 | 0.2702409 | 0.3198477 | 0.3877597 | 0.4780826 | 0.9078577 |
| LOC290209   | 0.0054732 | 0         | 0.0261002 | 0.0546524 | 0.0946223 | 0.0343269 |
| Fam115c     | 0.3374266 | 0.2880321 | 0.2779165 | 0.4519413 | 0.422721  | 0.5818067 |
| LOC691153   | 0.1280422 | 0.2433442 | 0.2041487 | 0.0911319 | 0.0441559 | 0.0794556 |
| Trhde       | 0.0630321 | 0.0896759 | 0.0815676 | 0.1698511 | 0.1382309 | 0.180999  |
| LOC1003596  | 0.261915  | 0.2250725 | 0.2675629 | 0.6247555 | 0.4822695 | 0.2856658 |
| LOC679087   | 0.0735933 | 0.093777  | 0.0418346 | 0.1480219 | 0.1536306 | 0.161548  |
| Lgr6        | 0.1932383 | 0.3833884 | 0.3978146 | 0.1390724 | 0.2161785 | 0.1983078 |
| RGD1566337  | 0         | 0         | 0         | 0.0574866 | 0.0400081 | 0         |
| Edaradd     | 0.1173722 | 0.1820499 | 0.1739288 | 0.2943425 | 0.2743247 | 0.3903889 |
| LOC691485   | 0.0133054 | 0.0292254 | 0.0287242 | 0.071675  | 0.0421641 | 0.1575038 |
| LOC500194   | 0.7933429 | 1.7146812 | 0.1478652 | 0.5075285 | 0.7115747 | 0.5846232 |
| Trpc7       | 0         | 0         | 0.0025906 | 0.007604  | 0.0146924 | 0.0196736 |
| LOC499565   | 0         | 0         | 0         | 0.0647158 | 0.1006683 | 0.0721331 |
| Plin1       | 0.0263433 | 0.1486341 | 0         | 0.3184908 | 0.077433  | 0.4954322 |
| Tmem52      | 0.7118027 | 0.5941062 | 0.5533968 | 0.3460385 | 0.4162886 | 0.4097405 |
| LOC1009125  | 0.0555699 | 0.0617196 | 0.0644589 | 0.5866438 | 0.0619696 | 0.0920422 |
| Pdilt       | 0.0800119 | 0.0969586 | 0.100373  | 0.0953922 | 0.2618466 | 0.366137  |
| Itgbl1      | 0.1797407 | 0.1849878 | 0.139946  | 0.3397271 | 0.2616665 | 0.397625  |
| Ubap11      | 0.6145327 | 0.5309094 | 0.6358692 | 0.4586324 | 0.3854779 | 0.3292621 |
| Gpr21       | 0.0040231 | 0         | 0         | 0.0336314 | 0.0362859 | 0.0043469 |
| Lrfn1       | 0.2146179 | 0.2325287 | 0.1842011 | 0.1003491 | 0.1231976 | 0.0789213 |
| Mas1        | 0.0211924 | 0.0236413 | 0.0318063 | 0.0991206 | 0.0802302 | 0.0515854 |

|             |           |           |           |           |           |           |
|-------------|-----------|-----------|-----------|-----------|-----------|-----------|
| LOC10035970 | 0.0056215 | 0.0062842 | 0.0189255 | 0.0439324 | 0.0331387 | 0.0545283 |
| Elov16      | 0.0728965 | 0.0701307 | 0.0421863 | 0.130773  | 0.2093285 | 0.1416622 |
| Jun         | 1.9844632 | 1.367643  | 1.3561644 | 1.3397005 | 1.278294  | 1.462257  |
| Cnr1        | 0.1353592 | 0.083154  | 0.1639835 | 0.1705756 | 0.2673272 | 0.357443  |
| LOC1025552  | 0.1064935 | 1.006039  | 0         | 0         | 0.1180121 | 0         |
| Ccdc18      | 0.0333809 | 0.0744084 | 0.0656452 | 0.1300409 | 0.1527889 | 0.1582504 |
| LOC1003646  | 0.0076367 | 0.0169046 | 0.0147961 | 0.0555394 | 0.0966153 | 0.0546978 |
| Fam49a      | 0.1852059 | 0.2082999 | 0.2231688 | 0.3708026 | 0.3722664 | 0.370675  |
| Mir568      | 1.3694031 | 1.641453  | 1.4766288 | 1.8970802 | 1.7149039 | 1.835881  |
| Serpine3    | 0.0147432 | 0.0191447 | 0.008462  | 0.0666858 | 0.0538545 | 0.0223766 |
| LOC1025544  | 0         | 0.0155937 | 0         | 0.0806927 | 0.0618248 | 0.0150752 |
| Eppin       | 0.0250827 | 0.027967  | 0.0124315 | 0.1461508 | 0.1066499 | 0.0765654 |
| RGD1565987  | 0.010356  | 0.0944632 | 0.0296748 | 0         | 0.009704  | 0         |
| Spns3       | 0.7005092 | 0.4314447 | 0.3230976 | 0.276105  | 0.2414984 | 0.3563022 |
| LOC1009124  | 0.0979059 | 0.1170775 | 0.1091057 | 0.2203354 | 0.2254937 | 0.2327248 |
| Asphd2      | 0.0068521 | 0.0262341 | 0.0066944 | 0         | 0         | 0         |
| Btc         | 0.6719956 | 0.8356282 | 0.7443808 | 1.0487661 | 1.1179955 | 0.9091261 |
| Mcmcdc2     | 0.0937409 | 0.1233528 | 0.1205391 | 0.1993648 | 0.1863167 | 0.2738905 |
| Oprd1       | 0.116182  | 0.0357435 | 0.103682  | 0.0308872 | 0         | 0.0141645 |
| Mpc11       | 0.0647057 | 0.1354929 | 0.07832   | 0.2400207 | 0.1876457 | 0.1965699 |
| Mclr        | 0.065111  | 0.0376158 | 0.0706221 | 0.1251006 | 0.1295089 | 0.16365   |
| Eid3        | 0         | 0.0078904 | 0.0398303 | 0.0329285 | 0.1111126 | 0.1749289 |
| Aqp8        | 0.198282  | 0.3398071 | 0.3593489 | 0.1418482 | 0.1434197 | 0.1405749 |
| Syt1        | 0.0271036 | 0.0509354 | 0.0536642 | 0.1529203 | 0.095751  | 0.1023536 |
| Kcna2       | 0.0240358 | 0.0405787 | 0.0055354 | 0.1135264 | 0.0787399 | 0.0411391 |
| Pik3c2b     | 0.1421936 | 0.2113441 | 0.1219976 | 0.3125904 | 0.2286662 | 0.3258845 |
| LOC10254710 | 0.1254923 | 0.1300006 | 0.0594515 | 0.2862018 | 0.2085994 | 0.2520524 |
| Bhlha15     | 0.1491955 | 0.1672933 | 0.1010596 | 0.0682856 | 0.0595239 | 0.057751  |
| Adcy10      | 0.0288706 | 0.0763653 | 0.0560054 | 0.1163579 | 0.1867886 | 0.0978147 |
| Kcnv2       | 0.0703161 | 0.0825362 | 0.1004684 | 0.1701422 | 0.2154595 | 0.1660539 |
| Gdf15       | 1.225254  | 0.6823217 | 0.6806853 | 0.6379057 | 0.6291415 | 0.5374086 |
| Spem1       | 0         | 0.0569002 | 0.0731105 | 0         | 0         | 0         |
| LOC1036948  | 0.1226578 | 0.0995826 | 0.0711975 | 0.0527615 | 0.0684679 | 0.7690958 |
| RGD1565779  | 0.2363357 | 0.2877041 | 0.6373333 | 0.2405613 | 0.1953284 | 0.1105843 |
| Cd84        | 0.1279743 | 0.2904411 | 0.1544481 | 0.4301587 | 0.3001159 | 0.4628633 |
| Hmga2       | 0         | 0.0129217 | 0         | 0.0628445 | 0.0516855 | 0.047942  |
| Vom2r44     | 0.0975263 | 0.0463655 | 0.042906  | 0.2384116 | 0.1422861 | 0.116749  |
| Trim43a     | 0.0304304 | 0         | 0.0239594 | 0.1021355 | 0.060514  | 0.0972741 |
| Ccdc155     | 0.0198222 | 0.0148689 | 0.0318235 | 0         | 0         | 0.0072465 |
| Pgbd1       | 0         | 0         | 0.0223357 | 0.041457  | 0.0418571 | 0.0762328 |
| St18        | 0.0028579 | 0.0031959 | 0.0137829 | 0.0318761 | 0.0273125 | 0.0241117 |
| Fam188b2    | 0         | 0         | 0         | 0.0237069 | 0         | 0.0392665 |
| LOC502812   | 0.3896279 | 0.6785356 | 0         | 0.0672804 | 0.0855115 | 0.0749671 |
| RGD1564381  | 0         | 0.5134185 | 0.0452057 | 0         | 0.022254  | 0         |
| Zfp70911    | 0         | 0.0152249 | 0.0053782 | 0.0333062 | 0.0276328 | 0.0427384 |
| Cc111       | 0         | 0.1049782 | 0.0361568 | 0         | 0         | 0         |
| Serpina1    | 0.0123479 | 0.2119626 | 0.1740586 | 0.2322196 | 0.8016275 | 0.1572812 |
| LOC1003628  | 0.0071663 | 0.0062423 | 0.0077725 | 0.0269313 | 0.0262531 | 0.0145076 |
| Gp5         | 0         | 0         | 0         | 0.0103124 | 0.0067243 | 0.0228564 |
| Akain1      | 0.3116497 | 0.2305833 | 0.2164599 | 0.4333754 | 0.3809054 | 0.5105715 |
| Slc24a2     | 0.0021396 | 0         | 0         | 0.0081701 | 0.006973  | 0.0057577 |

|            |           |           |           |           |           |           |
|------------|-----------|-----------|-----------|-----------|-----------|-----------|
| Ism1       | 0.4628042 | 0.3595286 | 0.3223181 | 0.6132657 | 0.5704541 | 0.7439957 |
| Rnase12    | 0.0480291 | 0.0933662 | 0.054331  | 0.0080612 | 0.0078539 | 0.0179228 |
| Cenpm      | 0.1753275 | 0.2480778 | 0.1664725 | 0.080004  | 0.071556  | 0.0816234 |
| Nfatc2ip   | 0.3856168 | 0.3622894 | 0.4242458 | 0.6421785 | 0.6375517 | 0.5501863 |
| Srm        | 0.8663187 | 0.805615  | 0.8156064 | 0.5472179 | 0.7230058 | 0.4147246 |
| Col24a1    | 0.0528939 | 0.0192329 | 0.0377982 | 0.120259  | 0.0655652 | 0.121803  |
| Ncf2       | 0.1719866 | 0.2612021 | 0.1256464 | 0.0825623 | 0.0777678 | 0.0854049 |
| LOC362382  | 0.1519551 | 0.8683715 | 0         | 0.0213284 | 0.0777746 | 0.1082255 |
| LOC1025515 | 0.0045464 | 0.0050831 | 0         | 0.0129839 | 0.0249455 | 0.0511994 |
| Kcnip3     | 0.5036874 | 0.4173016 | 0.6111407 | 0.3273529 | 0.2951211 | 0.3592194 |
| LOC1036905 | 0.1551343 | 0.2017123 | 0.0884264 | 0.3436817 | 0.3496514 | 0.3722657 |
| Mum111     | 0.0535254 | 0.0554762 | 0.0576086 | 0.1189957 | 0.0861135 | 0.2020542 |
| Atpla3     | 0.0768961 | 0.1563684 | 0.0921985 | 0.0386603 | 0.0354366 | 0.0534074 |
| LOC1025514 | 0.0112444 | 0.0125604 | 0.019935  | 0.0367278 | 0.0341729 | 0.0820333 |
| LOC1083480 | 0.0115797 | 0.0304187 | 0.0068241 | 0.0819966 | 0.2033359 | 0.0025296 |
| Zcchc16    | 0.1397141 | 0.1536724 | 0.099703  | 0.2616271 | 0.2109    | 0.288908  |
| Tnfsf14    | 0.0773304 | 0.2256628 | 0.0756844 | 0.0388883 | 0         | 0.0330206 |
| LOC688442  | 0.0183153 | 0.0204395 | 0.0753056 | 0.0665591 | 0         | 0.6679042 |
| LOC680933  | 0.295242  | 0.2881232 | 0.3566562 | 0.5640414 | 0.5576298 | 0.4609746 |
| LOC1083481 | 0.5558881 | 0.0912973 | 0.1642357 | 0.0855667 | 0.1226555 | 0.0951241 |
| LOC1025540 | 0         | 0         | 0         | 0.0809148 | 0.0376953 | 0         |
| Macc1      | 0.0286644 | 0.0786232 | 0.0644401 | 0.1441143 | 0.0921502 | 0.2249164 |
| Mir30c2    | 0.099923  | 0         | 0         | 0.3965672 | 0.1715691 | 0.5101454 |
| Dcp2       | 0         | 0.0773569 | 0.0221726 | 0.0951169 | 0.1505196 | 0.19855   |
| Bcl2       | 0.412482  | 0.4364961 | 0.3874501 | 0.6202948 | 0.655203  | 0.6341896 |
| Cidea      | 0.8363269 | 0.6105809 | 0.9205733 | 0.4654404 | 0.5659799 | 0.6122581 |
| Ccdc36     | 0         | 0         | 0         | 0         | 0.022695  | 0.0260954 |
| Nfe213     | 0.0116926 | 0         | 0.022557  | 0.0634808 | 0.0181117 | 0.1316036 |
| Snx20      | 0.4163158 | 0.5752958 | 0.3988607 | 0.2692253 | 0.290368  | 0.2934996 |
| RT1-DMa    | 0.2352861 | 0.7234733 | 0.189289  | 0.1289157 | 0.2471796 | 0.0611214 |
| Mybpc2     | 0.4497704 | 0.5349281 | 0.6267771 | 0.5524375 | 0.5428582 | 1.1738092 |
| Cadm4      | 0.9112628 | 0.7158706 | 0.8210827 | 0.4828517 | 0.6836447 | 0.5628507 |
| Mlana      | 0.1544894 | 0.0874402 | 0.0670421 | 0.2047492 | 0.4367027 | 0.2246011 |
| LOC1003654 | 0.0843799 | 0.1071757 | 0         | 0         | 0         | 0         |
| Hist1h2aa  | 0         | 0         | 0         | 0.0224919 | 0.0627037 | 0.1697161 |
| Tbc1d12    | 0.0961336 | 0.1561493 | 0.1428881 | 0.2471878 | 0.3264081 | 0.2114042 |
| Zfp53      | 0.2212713 | 0.2949218 | 0.2569922 | 0.4047462 | 0.3866282 | 0.5077268 |
| Mast1      | 0.0223828 | 0.0542802 | 0.0674073 | 0.1219258 | 0.1252452 | 0.1303824 |
| Fgf10      | 0.264437  | 0.3118565 | 0.3250561 | 0.5803106 | 0.5570531 | 0.4814266 |
| Ccne2      | 0.2502388 | 0.3360312 | 0.2386633 | 0.4842115 | 0.5220004 | 0.3593175 |
| Btbd8      | 0.1100961 | 0.1550071 | 0.1405787 | 0.2340874 | 0.2255576 | 0.2829684 |
| LOC1009126 | 0.165292  | 0.1931709 | 0.147215  | 0.0446567 | 0.0873186 | 0.0753371 |
| Batf2      | 0.121212  | 0.4010287 | 0.0505898 | 0.041185  | 0.052767  | 0.0876757 |
| Ak9        | 0.2915367 | 0.399081  | 0.291308  | 0.1522708 | 0.2620308 | 0.1633355 |
| Sbp1       | 0.2422091 | 0.5490962 | 0.241681  | 0.0878868 | 0.1747029 | 0.2055542 |
| Vom2r45    | 0         | 0         | 0         | 0.0163843 | 0.0107095 | 0         |
| LOC691893  | 0.2110569 | 0.9847659 | 0.0871679 | 0.173816  | 0.1854443 | 0         |
| Hrct1      | 0.6836473 | 0.8927701 | 0.8486238 | 0.5369847 | 0.6329975 | 0.5137948 |
| Grin2b     | 0.0108965 | 0         | 0.0677267 | 0.0021162 | 0.0041132 | 0         |
| Plpp4      | 0         | 0.0182963 | 0.0160174 | 0.0157673 | 0.1038374 | 0.1246944 |
| Wdr77      | 0.6818924 | 0.5274892 | 0.7062504 | 0.3200861 | 0.3714043 | 0.566058  |

|             |           |           |           |           |           |           |
|-------------|-----------|-----------|-----------|-----------|-----------|-----------|
| LOC1083480  | 0.0747082 | 0.0395927 | 0.0638391 | 0.014019  | 0.0236316 | 0.015732  |
| LOC10254810 | 0.2072245 | 0.3646527 | 0.2830563 | 0.5212767 | 0.4411735 | 0.4544235 |
| Prp211      | 0.0305665 | 0.0581122 | 0.0477764 | 0.1107213 | 0.0937905 | 0.0813063 |
| LOC367858   | 0.2913042 | 0.3709217 | 0.2389234 | 0.1641598 | 0.1476199 | 0.0868435 |
| Gpr25       | 0.0055717 | 0.0123691 | 0.0108193 | 0         | 0         | 0         |
| Trim29      | 0.3023298 | 0.4667679 | 0.316248  | 0.108419  | 0.200804  | 0.2672351 |
| Fam169a     | 0.1506833 | 0.2567552 | 0.3181425 | 0.3723957 | 0.4834109 | 0.3608048 |
| Primpol     | 0.1048656 | 0.209946  | 0.1346123 | 0.2778924 | 0.2429203 | 0.3324909 |
| Ogn         | 0.876475  | 1.0882607 | 0.9708697 | 0.8556835 | 0.783531  | 0.3300523 |
| Nat3        | 0         | 0         | 0.0042481 | 0.0083219 | 0.0121058 | 0.0207532 |
| Spocd1      | 0.0139033 | 0.0155249 | 0.0202226 | 0         | 0         | 0.0038011 |
| S100a9      | 0.1485135 | 0.8629933 | 0.3170785 | 0.0917212 | 0.1157443 | 0.3133721 |
| Zfp354c     | 0.202476  | 0.2250308 | 0.1737371 | 0.3308016 | 0.4282166 | 0.3586949 |
| Kirrel3     | 0.048027  | 0.0815462 | 0.0977734 | 0.0051084 | 0.021959  | 0.0413067 |
| LOC1036906  | 0.0231446 | 0.0381654 | 0.0544871 | 0         | 0         | 0         |
| RGD1564074  | 0.2114601 | 0.2568644 | 0.2075599 | 0.4745396 | 0.3264711 | 0.3575699 |
| Fam92b      | 0.0559515 | 0.028116  | 0.0591809 | 0.0147224 | 0.0072325 | 0.019213  |
| LOC1036935  | 0.0591261 | 0.0478761 | 0.0655106 | 0.1337017 | 0.1609774 | 0.2123393 |
| LOC1083505  | 0         | 0         | 0         | 0.0206486 | 0.0330415 | 0.0155699 |
| Was         | 0.6295384 | 0.8135047 | 0.605081  | 0.5077641 | 0.3973451 | 0.5026106 |
| LOC1036900  | 0.02155   | 0.1055368 | 0.0378657 | 0.0139328 | 0.0169058 | 0         |
| Apitd1      | 0.798523  | 0.777547  | 0.8565986 | 0.5524454 | 0.6361631 | 0.5404457 |
| Akr1c2      | 0.040413  | 0.0589827 | 0.0519288 | 0.05115   | 0.6789042 | 0         |
| Mcf2        | 0.010479  | 0.0047206 | 0.012258  | 0.035236  | 0.0232038 | 0.0435945 |
| Rorc        | 0         | 0.0392938 | 0.0128653 | 0.079081  | 0.1099856 | 0.0478375 |
| Polq        | 0.0157478 | 0.0076217 | 0         | 0.0130165 | 0.0418881 | 0.0675187 |
| Evalc       | 0.3617552 | 0.3423249 | 0.390876  | 0.2215391 | 0.2021812 | 0.2334477 |
| Oacy1       | 0.30719   | 0.1943352 | 0.2379301 | 0.0820039 | 0.1058652 | 0.1789351 |
| NEWGENE_15  | 0.0776494 | 0.0078551 | 0.0102594 | 0.2278982 | 0.0130698 | 0.2786033 |
| LOC1009117  | 0.481749  | 0.0614884 | 0.1046882 | 0.1102161 | 0.0597135 | 0.0739456 |
